# Supplementary material for: Enantioselective construction of substituted hydantoins via chiral phosphoric acid catalyzed annulation/Heyns rearrangement of aryl-substituted ureas with glyoxals
Source: Royal Society of Chemistry journal article supplement (doi:10.1039/d3qo01194a), 2023-01-01

Supporting Information for:

**Enantioselective construction of substituted hydantoins via  
chiral phosphoric acid catalyzed annulation/Heyns  
rearrangement of aryl-substituted ureas with glyoxals**

Yong Wang,<sup>a</sup> Jingyuan Li,<sup>b</sup> Yanyan Li,<sup>a</sup> Chao Pi,<sup>a</sup> Yangjie Wu,<sup>a</sup> and Xiuling Cui<sup>\*a</sup>

<sup>a</sup> Henan Key Laboratory of Chemical Biology and Organic Chemistry, Key Laboratory of Applied Chemistry of Henan Universities, Green Catalysis Center, and College of Chemistry, Zhengzhou University, Zhengzhou 450052, China

<sup>b</sup> School of Chemistry and Chemical Engineering, Shanghai Jiao Tong University, Shanghai 200240, China

\*E-mail: [cuixl@zzu.edu.cn](mailto:cuixl@zzu.edu.cn)

**Table of Contents:**

|                                                                           |            |
|---------------------------------------------------------------------------|------------|
| <b>I. General Information</b> .....                                       | <b>S2</b>  |
| <b>II. Optimization of the Reaction Conditions</b> .....                  | <b>S2</b>  |
| <b>III. General Procedure and Characterization of Products 4</b> .....    | <b>S3</b>  |
| <b>IV. Control Experiments</b> .....                                      | <b>S10</b> |
| <b>V. Gram-scale Synthesis and Further Chemical Transformations</b> ..... | <b>S12</b> |
| <b>VI. References</b> .....                                               | <b>S13</b> |
| <b>VII. Copies of NMR Spectra</b> .....                                   | <b>S14</b> |
| <b>VIII. Copies of HPLC Spectra</b> .....                                 | <b>S40</b> |

## I. General Information

Unless otherwise noted, substrates, catalysts and solvents were obtained from commercial suppliers and used without further purification. The urea **1e**, **1i-1k** were prepared according to the literatures.<sup>1</sup> Products **3** were visualized by UV-light at 254 nm. Flash chromatography was conducted on silica gel (200–300 mesh). The <sup>1</sup>H NMR, <sup>13</sup>C NMR and <sup>19</sup>F NMR spectra were obtained using a Bruker AVANCE III spectrometer at 400, 100 and 376 MHz, respectively. Chemical shifts are reported in units of parts per million (ppm) downfield from tetramethylsilane (TMS), and all coupling constants are reported in hertz. Peak multiplicity is indicated as follows: br = broad, s = singlet, d = doublet, t = triplet, q = quartet, quint = quintet, sext = sextet, m = multiplet, and broad = b. Enantiomeric excesses values were determined with HPLC on Chiral Daicel Chiralpak AS-H and AD-H (mobile phase: hexane/<sup>i</sup>PrOH). Optical rotation were measured on a Anton Paar MCP 4100 polarimeter and reported as follows: [α]<sub>D</sub> 20 (c = g/100 mL, solvent). Melting points were uncorrected. All high-resolution mass spectra were obtained on an TOF LC/MS equipped with an ESI source.

## II. Optimization of the Reaction Conditions

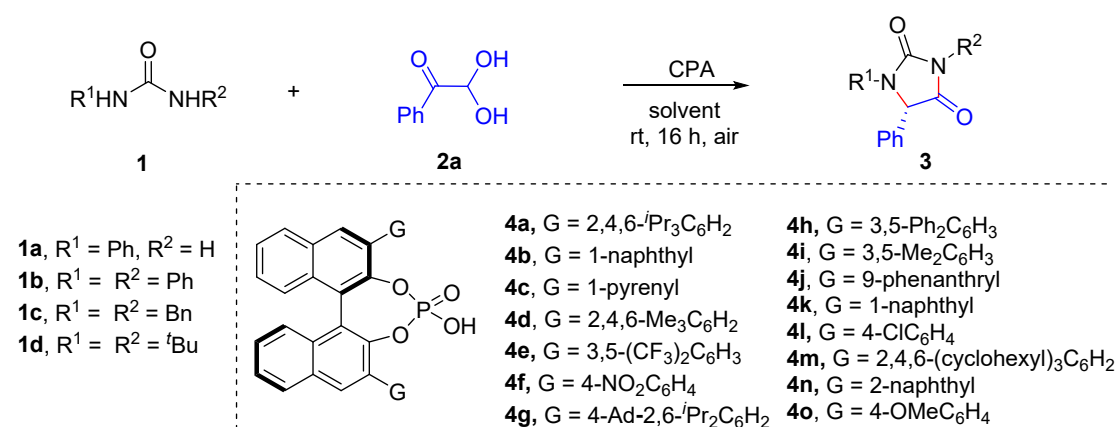

| entry | CPA       | 1/3           | solvent | yield (%) <sup>b</sup> | ee (%) <sup>c</sup> |
|-------|-----------|---------------|---------|------------------------|---------------------|
| 1     | <b>4a</b> | <b>1a/3aa</b> | toluene | 61                     | 14                  |
| 2     | <b>4a</b> | <b>1b/3ba</b> | toluene | 23                     | 92                  |
| 3     | <b>4a</b> | <b>1c/3ca</b> | toluene | 50                     | 0                   |
| 4     | <b>4a</b> | <b>1d/3da</b> | toluene | quant.                 | 28                  |
| 5     | <b>4b</b> | <b>1b/3ba</b> | toluene | 80                     | 78                  |
| 6     | <b>4c</b> | <b>1b/3ba</b> | toluene | 87                     | 89                  |
| 7     | <b>4d</b> | <b>1b/3ba</b> | toluene | 45                     | 89                  |
| 8     | <b>4e</b> | <b>1b/3ba</b> | toluene | 41                     | -68                 |
| 9     | <b>4f</b> | <b>1b/3ba</b> | toluene | quant.                 | -38                 |
| 10    | <b>4h</b> | <b>1b/3ba</b> | toluene | 27                     | 33                  |
| 11    | <b>4i</b> | <b>1b/3ba</b> | toluene | 98                     | 78                  |
| 12    | <b>4j</b> | <b>1b/3ba</b> | toluene | 48                     | 86                  |
| 13    | <b>4k</b> | <b>1b/3ba</b> | toluene | 80                     | 78                  |

|                 |           |               |                   |        |     |
|-----------------|-----------|---------------|-------------------|--------|-----|
| 14              | <b>4l</b> | <b>1b/3ba</b> | toluene           | quant. | -33 |
| 15              | <b>4m</b> | <b>1b/3ba</b> | toluene           | 18     | 92  |
| 16              | <b>4n</b> | <b>1b/3ba</b> | toluene           | 93     | 48  |
| 17              | <b>4o</b> | <b>1b/3ba</b> | toluene           | quant. | 45  |
| 18 <sup>d</sup> | <b>4a</b> | <b>1b/3ba</b> | PhCl              | quant. | 91  |
| 19 <sup>d</sup> | <b>4a</b> | <b>1b/3ba</b> | <i>o</i> -xylene  | 97     | 91  |
| 20 <sup>d</sup> | <b>4a</b> | <b>1b/3ba</b> | <i>m</i> -xylene  | 85     | 85  |
| 21 <sup>d</sup> | <b>4a</b> | <b>1b/3ba</b> | <i>p</i> -xylene  | 89     | 75  |
| 22 <sup>d</sup> | <b>4a</b> | <b>1b/3ba</b> | benzene           | 73     | 95  |
| 23 <sup>d</sup> | <b>4a</b> | <b>1b/3ba</b> | CCl <sub>4</sub>  | quant. | 94  |
| 24 <sup>d</sup> | <b>4a</b> | <b>1b/3ba</b> | mesitylene        | 51     | 93  |
| 25 <sup>d</sup> | <b>4a</b> | <b>1b/3ba</b> | PhCF <sub>3</sub> | quant. | 90  |
| 26 <sup>e</sup> | <b>4a</b> | <b>1b/3ba</b> | benzene           | quant. | 95  |
| 27 <sup>e</sup> | <b>4g</b> | <b>1b/3ba</b> | benzene           | quant. | 96  |

<sup>a</sup>Reaction conditions: **1** (0.05 mmol), **2a** (0.075 mmol), CPA (10 mol %), solvent (2 mL), rt, 16 h, air. <sup>b</sup>Isolated yields, quant. = quantitative yield. <sup>c</sup>Determined by chiral HPLC. <sup>d</sup>90 °C. <sup>e</sup>**1b** (0.12 mmol), **2a** (0.1 mmol), CPA (10 mol %), solvent (2 mL), 90 °C, 16 h, air.

### III. General Procedure and Characterization of Products **3**

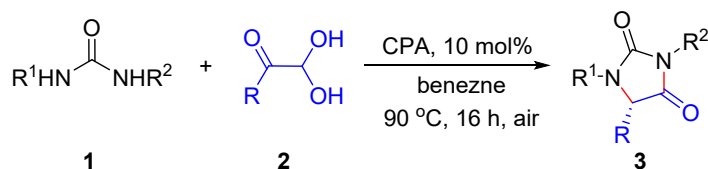

The urea **1** (0.12 mmol), glyoxal hydrate **2** (0.1 mmol) and CPA (10 mol %) was dissolved in benzene (2 mL). The reaction mixture was stirred at 90 °C for 16 h. The crude product was separated by flash column chromatography on silica gel to afford target products **3**.

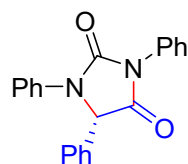

#### (*S*)-1,3,5-triphenylimidazolidine-2,4-dione (**3ba**).<sup>2</sup>

Product **3ba** was obtained by flash chromatography (PE:EA = 5:1) in quantitative yield as white solid. 35.4 mg, 96% ee. M.p.: 124-125 °C. <sup>1</sup>H NMR (CDCl<sub>3</sub>)  $\delta$ : 7.53 (d, *J* = 7.9 Hz, 2H), 7.50-7.43 (m, 4H), 7.43-7.33 (m, 6H), 7.30 (t, *J* = 8.4 Hz, 2H), 7.11 (t, *J* = 7.4 Hz, 1H), 5.61 (s, 1H); <sup>13</sup>C NMR (CDCl<sub>3</sub>)  $\delta$ : 168.9, 153.6, 136.3, 132.9, 131.4, 129.3, 129.2, 129.1, 129.1, 128.4, 126.8, 126.5, 126.3, 125.0, 120.6, 64.1;  $[\alpha]_D^{20} = +25.9$  (*c* 0.4, DCM). Chiral HPLC: Chiralpak AD-H, hexane:*i*PrOH = 60:40, 0.5 mL/min, 270 nm; t<sub>R</sub> = 36.0 min (minor), 77.4 min (major).

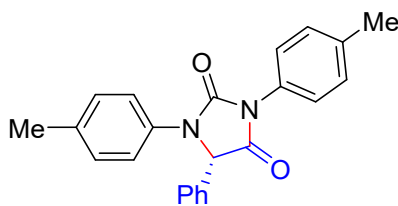

**(S)-5-phenyl-1,3-di-*p*-tolylimidazolidine-2,4-dione (3ea).**

Product **3ea** was obtained by flash chromatography (PE:EA = 5:1) in quantitative yield as white solid. 36.7 mg, 95% ee. M.p.: 166-168 °C. <sup>1</sup>H NMR (CDCl<sub>3</sub>) δ: 7.43-7.29 (m, 9H), 7.29-7.23 (m, 2H), 7.09 (d, *J* = 8.3 Hz, 2H), 5.56 (s, 1H), 2.37 (s, 3H), 2.26 (s, 3H); <sup>13</sup>C NMR (CDCl<sub>3</sub>) δ: 169.2, 153.8, 138.5, 134.8, 133.8, 133.1, 129.8, 129.7, 129.3, 129.2, 128.8, 126.9, 126.2, 120.8, 64.3, 21.2, 20.8; HRMS (ESI) *m/z* calcd for C<sub>23</sub>H<sub>21</sub>N<sub>2</sub>O<sub>2</sub><sup>+</sup> (M+H)<sup>+</sup> 357.1598, found 357.1597. [α]<sub>D</sub><sup>20</sup> = +25.2 (*c* 0.4, DCM). Chiral HPLC: Chiralpak AD-H, hexane:<sup>i</sup>PrOH = 60:40, 0.5 mL/min, 270 nm; t<sub>R</sub> = 42.8 min (minor), 69.2 min (major).

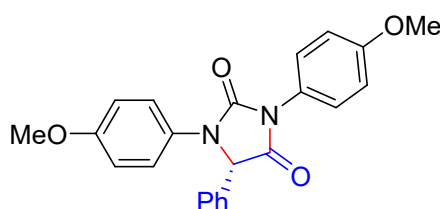

**(S)-1,3-bis(4-methoxyphenyl)-5-phenylimidazolidine-2,4-dione (3fa).**

Product **3fa** was obtained by flash chromatography (PE:EA = 5:1) in quantitative yield as white solid. 42.9 mg, 90% ee. M.p.: 68-70 °C. <sup>1</sup>H NMR (CDCl<sub>3</sub>) δ: 7.41-7.28 (m, 9H), 7.00-6.93 (m, 2H), 6.85-6.79 (m, 2H), 5.52 (s, 1H), 3.81 (s, 3H), 3.73 (s, 3H); <sup>13</sup>C NMR (CDCl<sub>3</sub>) δ: 169.4, 159.4, 157.0, 154.1, 133.2, 129.3, 129.2, 127.7, 127.1, 124.2, 123.0, 114.4, 114.4, 64.7, 55.5, 55.4; HRMS (ESI) *m/z* calcd for C<sub>23</sub>H<sub>21</sub>N<sub>2</sub>O<sub>4</sub><sup>+</sup> (M+H)<sup>+</sup> 389.1496, found 389.1496. [α]<sub>D</sub><sup>20</sup> = +32.3 (*c* 0.4, DCM). Chiral HPLC: Chiralpak AS-H, hexane:<sup>i</sup>PrOH = 60:40, 0.5 mL/min, 270 nm; t<sub>R</sub> = 37.0 min (minor), 123.2 min (major).

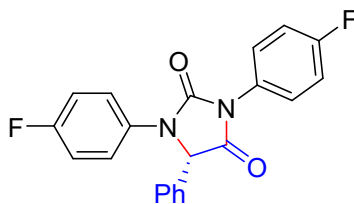

**(S)-1,3-bis(4-fluorophenyl)-5-phenylimidazolidine-2,4-dione (3ga).**

Product **3ga** was obtained by flash chromatography (PE:EA = 5:1) in quantitative yield as white solid. 37.1 mg, 93% ee. M.p.: 131-133 °C. <sup>1</sup>H NMR (CDCl<sub>3</sub>) δ: 7.50-7.41 (m, 4H), 7.41-7.30 (m, 5H), 7.20-7.10 (m, 2H), 7.04-6.91 (m, 2H), 5.56 (s, 1H); <sup>13</sup>C NMR (CDCl<sub>3</sub>) δ: 168.8, 163.4, 161.0, (d, *J* = 19.0 Hz), 158.7, 153.6, 132.5, 132.2 (d, *J* = 2.9 Hz), 129.5, 128.2 (d, *J* = 8.8 Hz), 127.3 (d, *J* = 3.1 Hz), 126.9, 122.8 (d, *J* = 8.1 Hz), 116.3 (d, *J* = 11.5 Hz), 116.0 (d, *J* = 11.2 Hz), 64.5; <sup>19</sup>F NMR (CDCl<sub>3</sub>): -112.2, -116.4. HRMS (ESI) *m/z* calcd for C<sub>21</sub>H<sub>15</sub>F<sub>2</sub>N<sub>2</sub>O<sub>2</sub><sup>+</sup> (M+H)<sup>+</sup> 365.1096, found 365.1098. [α]<sub>D</sub><sup>20</sup> = +32.0 (*c* 0.4, DCM). Chiral HPLC: Chiralpak AS-H, hexane:<sup>i</sup>PrOH = 60:40, 0.5 mL/min, 270 nm; t<sub>R</sub> = 21.7 min (minor), 30.4 min (major).

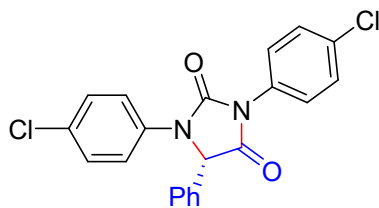

**(S)-1,3-bis(4-chlorophenyl)-5-phenylimidazolidine-2,4-dione (3ha).**

Product **3ha** was obtained by flash chromatography (PE:EA = 5:1) in quantitative yield as white solid. 42.2 mg, 95% ee. M.p.: 158-161 °C. <sup>1</sup>H NMR (CDCl<sub>3</sub>) δ: 7.49-7.32 (m, 11H), 7.29-7.21 (m, 2H), 5.56 (s, 1H); <sup>13</sup>C NMR (CDCl<sub>3</sub>) δ: 168.4, 153.2, 134.8, 134.4, 132.3, 130.5, 129.8, 129.6, 129.4, 129.3, 127.5, 126.8, 121.8, 64.1; HRMS (ESI) m/z calcd for C<sub>21</sub>H<sub>14</sub>Cl<sub>2</sub>N<sub>2</sub>O<sub>2</sub>Na<sup>+</sup> (M+Na)<sup>+</sup> 419.0325, found 419.0324. [α]<sub>D</sub><sup>20</sup> = +16.8 (c 0.4, DCM). Chiral HPLC: Chiralpak AS-H, hexane:PrOH = 60:40, 0.5 mL/min, 270 nm; tR = 24.7 min (minor), 45.5 min (major).

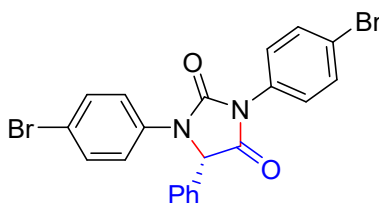

**(S)-1,3-bis(4-bromophenyl)-5-phenylimidazolidine-2,4-dione (3ia).**

Product **3ia** was obtained by flash chromatography (PE:EA = 5:1) in quantitative yield as white solid. 52.8 mg, 98% ee. M.p.: 207-208 °C. <sup>1</sup>H NMR (CDCl<sub>3</sub>) δ: 7.62-7.56 (m, 2H), 7.44-7.31 (m, 11H), 5.55 (s, 1H); <sup>13</sup>C NMR (CDCl<sub>3</sub>) δ: 168.3, 153.1, 135.3, 132.4, 132.3, 132.2, 130.3, 129.6, 127.7, 126.7, 122.4, 122.0, 118.2, 64.0; HRMS (ESI) m/z calcd for C<sub>21</sub>H<sub>14</sub>Br<sub>2</sub>N<sub>2</sub>O<sub>2</sub>Na<sup>+</sup> (M+Na)<sup>+</sup> 506.9314, found 506.9311. [α]<sub>D</sub><sup>20</sup> = +22.1 (c 0.5, DCM). Chiral HPLC: Chiralpak AS-H, hexane:PrOH = 60:40, 0.5 mL/min, 270 nm; tR = 23.4 min (minor), 49.6 min (major).

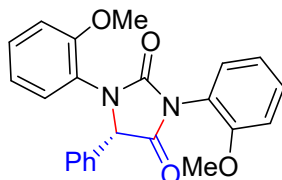

**(S)-1,3-bis(2-methoxyphenyl)-5-phenylimidazolidine-2,4-dione (3ja).**

Product **3ja** was obtained by flash chromatography (PE:EA = 2:1) in 93% yield as white solid. 35.9 mg, 68% ee. M.p.: 75-76 °C. <sup>1</sup>H NMR (CDCl<sub>3</sub>) δ: 7.43-7.26 (m, 7H), 7.23-7.15 (m, 2H), 7.10-6.98 (m, 2H), 6.92-6.79 (m, 2H), 5.68 (s, 1H), 3.88 (s, 3H), 3.85 (s, 3H); <sup>13</sup>C NMR (CDCl<sub>3</sub>) δ: 170.9, 155.2, 154.9, 154.9, 134.2, 130.8, 130.1, 130.0, 129.1, 129.0, 128.9, 128.2, 123.8, 121.0, 120.8, 120.6, 112.2, 111.9, 66.2, 56.0, 55.7; HRMS (ESI) m/z calcd for C<sub>23</sub>H<sub>20</sub>N<sub>2</sub>O<sub>4</sub>Na<sup>+</sup> (M+Na)<sup>+</sup> 411.1315, found 411.1313. [α]<sub>D</sub><sup>20</sup> = +5.5 (c 0.4, DCM). Chiral HPLC: Chiralpak AS-H, hexane:PrOH = 60:40, 0.5 mL/min, 270 nm; tR = 13.9 min (minor), 28.2 min (major).

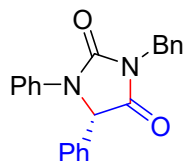

**(S)-3-benzyl-1,5-diphenylimidazolidine-2,4-dione (3ka).<sup>3</sup>**

Product **3ka** was obtained by flash chromatography (PE:EA = 10:1) in quantitative yield as white

solid. 76 % ee. M.p.: 183-185 °C. <sup>1</sup>H NMR (CDCl<sub>3</sub>) δ: 7.48-7.40 (m, 4H), 7.36-7.21 (m, 10H), 7.06 (t, *J* = 7.4 Hz, 1H), 5.44 (s, 1H), 4.76 (q, *J* = 17.5 Hz, 2H); <sup>13</sup>C NMR (CDCl<sub>3</sub>) δ: 169.7, 154.4, 136.4, 135.8, 132.8, 129.3, 129.2, 129.1, 128.8, 128.1, 126.7, 124.7, 120.2, 64.2, 42.9; HRMS (ESI) *m/z* calcd for C<sub>22</sub>H<sub>19</sub>N<sub>2</sub>O<sub>2</sub><sup>+</sup> (M+H)<sup>+</sup> 343.1441, found 343.1442. [α]<sub>D</sub><sup>20</sup> = +46.6 (*c* 0.4, DCM). Chiral HPLC: Chiralpak AD-H, hexane:PrOH = 60:40, 0.5 mL/min, 254 nm; t<sub>R</sub> = 19.2 min (minor), 26.2 min (major).

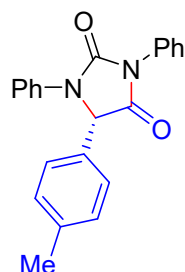

**(S)-1,3-diphenyl-5-(*p*-tolyl)imidazolidine-2,4-dione (3bb).**

Product **3bb** was obtained by flash chromatography (PE:EA = 5:1) in quantitative yield as colorless oil. 34.9 mg, 83% ee. <sup>1</sup>H NMR (CDCl<sub>3</sub>) δ: 7.56-7.50 (m, 2H), 7.50-7.42 (m, 4H), 7.41-7.34 (m, 1H), 7.33-7.25 (m, 4H), 7.18 (d, *J* = 8.0 Hz, 2H), 7.10 (t, *J* = 7.4 Hz, 1H), 5.57 (s, 1H), 2.31 (s, 3H); <sup>13</sup>C NMR (CDCl<sub>3</sub>) δ: 169.2, 153.7, 139.3, 136.4, 131.5, 130.1, 129.9, 129.2, 129.1, 128.5, 126.8, 126.4, 125.0, 120.7, 64.0, 29.7, 21.2; HRMS (ESI) *m/z* calcd for C<sub>22</sub>H<sub>19</sub>N<sub>2</sub>O<sub>2</sub><sup>+</sup> (M+H)<sup>+</sup> 343.1441, found 343.1442. [α]<sub>D</sub><sup>20</sup> = +29.8 (*c* 0.3, DCM). Chiral HPLC: Chiralpak AS-H, hexane:PrOH = 60:40, 0.5 mL/min, 254 nm; t<sub>R</sub> = 20.6 min (minor), 31.5 min (major).

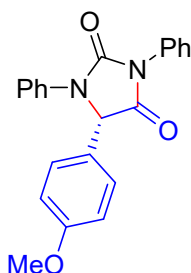

**(S)-5-(4-methoxyphenyl)-1,3-diphenylimidazolidine-2,4-dione (3bc).**

Product **3bc** was obtained by flash chromatography (PE:EA = 5:1) in 97% yield as white solid. 34.6 mg, 87% ee. M.p.: 56-58 °C. <sup>1</sup>H NMR (CDCl<sub>3</sub>) δ: 7.55-7.50 (m, 2H), 7.50-7.43 (m, 4H), 7.42-7.36 (m, 1H), 7.36-7.28 (m, 4H), 7.12 (t, *J* = 7.4 Hz, 1H), 6.90 (d, *J* = 8.8 Hz, 2H), 5.57 (s, 1H), 3.77 (s, 3H); <sup>13</sup>C NMR (CDCl<sub>3</sub>) δ: 169.3, 160.3, 153.6, 136.4, 131.5, 129.2, 129.1, 128.5, 128.1, 126.4, 125.0, 124.8, 120.8, 114.9, 63.7, 55.3; HRMS (ESI) *m/z* calcd for C<sub>22</sub>H<sub>19</sub>N<sub>2</sub>O<sub>3</sub><sup>+</sup> (M+H)<sup>+</sup> 359.1390, found 359.1390. [α]<sub>D</sub><sup>20</sup> = +17.3 (*c* 0.3, DCM). Chiral HPLC: Chiralpak AS-H, hexane:PrOH = 60:40, 0.5 mL/min, 270 nm; t<sub>R</sub> = 34.0 min (minor), 41.3 min (major).

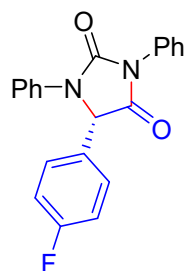

**(S)-5-(4-fluorophenyl)-1,3-diphenylimidazolidine-2,4-dione (3bd).**

Product **3bd** was obtained by flash chromatography (PE:EA = 5:1) in quantitative yield as white solid. 35.3 mg. 95% ee. M.p.: 55-57 °C. <sup>1</sup>H NMR (CDCl<sub>3</sub>) δ: 7.54-7.42 (m, 6H), 7.50-7.43 (m, 4H), 7.42-7.35 (m, 3H), 7.35-7.27 (m, 2H), 7.13 (tt, *J* = 7.4, 0.9 Hz, 1H), 7.10-7.02 (m, 2H), 5.60 (s, 1H); <sup>13</sup>C NMR (CDCl<sub>3</sub>) δ: 168.8, 163.1 (d, *J* = 248.8 Hz), 153.5, 136.2, 131.3, 129.2 (d, *J* = 9.9 Hz), 129.0, 128.8, 128.7, 128.6, 128.6, 126.3, 125.2, 120.7, 116.5 (d, *J* = 22.0 Hz), 63.4; <sup>19</sup>F NMR (CDCl<sub>3</sub>): -111.8. HRMS (ESI) *m/z* calcd for C<sub>21</sub>H<sub>16</sub>FN<sub>2</sub>O<sub>2</sub><sup>+</sup> (M+H)<sup>+</sup> 347.1190, found 347.1190. [α]<sub>D</sub><sup>20</sup> = +32 (*c* 0.1, DCM). Chiral HPLC: Chiralpak AD-H, hexane:*i*PrOH = 60:40, 0.5 mL/min, 270 nm; t<sub>R</sub> = 33.5 min (minor), 84.4 min (major).

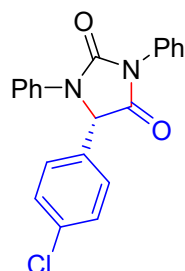

**(S)-5-(4-chlorophenyl)-1,3-diphenylimidazolidine-2,4-dione (3be).**

Product **3be** was obtained by flash chromatography (PE:EA = 5:1) in quantitative yield as white solid. 40.5 mg. 86% ee. M.p.: 149-150 °C. <sup>1</sup>H NMR (CDCl<sub>3</sub>) δ: 7.53-7.37 (m, 7H), 7.36-7.27 (m, 6H), 7.13 (t, *J* = 7.4 Hz, 1H), 5.59 (s, 1H); <sup>13</sup>C NMR (CDCl<sub>3</sub>) δ: 168.6, 153.5, 136.1, 135.3, 131.4, 131.3, 129.7, 129.3, 129.2, 128.6, 128.2, 126.3, 125.2, 120.6, 63.4. HRMS (ESI) *m/z* calcd for C<sub>21</sub>H<sub>16</sub>ClN<sub>2</sub>O<sub>2</sub><sup>+</sup> (M+H)<sup>+</sup> 363.0895, found 363.0895. [α]<sub>D</sub><sup>20</sup> = +34.3 (*c* 0.3, DCM). Chiral HPLC: Chiralpak AS-H, hexane:*i*PrOH = 60:40, 0.5 mL/min, 270 nm; t<sub>R</sub> = 25.7 min (minor), 61.7 min (major).

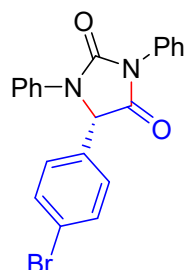

**(S)-5-(4-bromophenyl)-1,3-diphenylimidazolidine-2,4-dione (3bf).**

Product **3bf** was obtained by flash chromatography (PE:EA = 5:1) in 88% yield as white solid. 35.6 mg. 75% ee. M.p.: 166-168 °C. <sup>1</sup>H NMR (CDCl<sub>3</sub>) δ: 7.54-7.36 (m, 9H), 7.35-7.25 (m, 4H), 7.13 (t, *J* = 7.4 Hz, 1H), 5.57 (s, 1H); <sup>13</sup>C NMR (CDCl<sub>3</sub>) δ: 168.4, 153.5, 136.1, 132.6, 131.9, 131.3, 129.3, 129.2, 128.8, 128.6, 128.5, 126.3, 125.3, 123.5, 120.6, 63.5. HRMS (ESI) *m/z* calcd for C<sub>21</sub>H<sub>15</sub>BrN<sub>2</sub>O<sub>2</sub>Na<sup>+</sup> (M+Na)<sup>+</sup> 429.0209, found 429.0209. [α]<sub>D</sub><sup>20</sup> = +27.2 (*c* 0.4, DCM). Chiral HPLC: Chiralpak AS-H, hexane:*i*PrOH = 60:40, 0.5 mL/min, 254 nm; t<sub>R</sub> = 23.5 min (minor), 35.8 min (major).

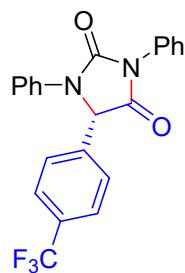

**(S)-1,3-diphenyl-5-(4-(trifluoromethyl)phenyl)imidazolidine-2,4-dione (3bg).**

Product **3bg** was obtained by flash chromatography (PE:EA = 5:1) in quantitative yield as colorless oil. 40.1 mg. 60% ee.  $^1\text{H NMR}$  ( $\text{CDCl}_3$ )  $\delta$ : 7.55-7.49 (m, 2H), 7.49-7.27 (m, 8H), 7.21 (d,  $J = 7.8$  Hz, 1H), 7.17-7.09 (m, 2H), 7.084 (td,  $J = 8.4, 2.2$  Hz, 1H), 5.60 (s, 1H);  $^{13}\text{C NMR}$  ( $\text{CDCl}_3$ )  $\delta$ : 168.4, 163.2 (d,  $J = 248.2$  Hz), 153.5, 136.2, 135.3 (d,  $J = 7.3$  Hz), 131.3, 131.1 (d,  $J = 8.2$  Hz), 129.3 (d,  $J = 12.8$  Hz), 128.6, 126.3, 125.2, 122.6 (d,  $J = 3.0$  Hz), 120.6, 116.4 (d,  $J = 21.2$  Hz), 114.1 (d,  $J = 23.0$  Hz), 63.5 (d,  $J = 1.6$  Hz);  $^{19}\text{F NMR}$  ( $\text{CDCl}_3$ ): -110.9. HRMS (ESI)  $m/z$  calcd for  $\text{C}_{22}\text{H}_{16}\text{F}_3\text{N}_2\text{O}_2^+$  ( $\text{M}+\text{H}$ ) $^+$  397.1158, found 397.1155.  $[\alpha]_D^{20} = +22.6$  ( $c$  0.4, DCM). Chiral HPLC: Chiralpak AS-H, hexane: $i$ PrOH = 60:40, 0.5 mL/min, 270 nm;  $t_R = 16.8$  min (minor), 24.7 min (major).

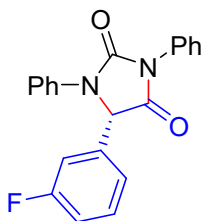

**(S)-5-(3-fluorophenyl)-1,3-diphenylimidazolidine-2,4-dione (3bh).**

Product **3bh** was obtained by flash chromatography (PE:EA = 5:1) in quantitative yield as colorless oil. 35.7 mg. 91% ee.  $^1\text{H NMR}$  ( $\text{CDCl}_3$ )  $\delta$ : 7.55-7.49 (m, 2H), 7.49-7.27 (m, 8H), 7.21 (d,  $J = 7.8$  Hz, 1H), 7.17-7.09 (m, 2H), 7.04 (td,  $J = 8.4, 2.2$  Hz, 1H), 5.60 (s, 1H);  $^{13}\text{C NMR}$  ( $\text{CDCl}_3$ )  $\delta$ : 168.4, 163.2 (d,  $J = 248.2$  Hz), 153.5, 136.2, 135.3 (d,  $J = 7.3$  Hz), 131.3, 131.1 (d,  $J = 8.2$  Hz), 129.3, 129.2, 128.6, 126.3, 125.2, 122.6 (d,  $J = 3.0$  Hz), 120.6, 116.4 (d,  $J = 21.1$  Hz), 114.1 (d,  $J = 23.0$  Hz), 63.5 (d,  $J = 1.5$  Hz);  $^{19}\text{F NMR}$  ( $\text{CDCl}_3$ ): -110.9. HRMS (ESI)  $m/z$  calcd for  $\text{C}_{21}\text{H}_{16}\text{FN}_2\text{O}_2^+$  ( $\text{M}+\text{H}$ ) $^+$  347.1190, found 347.1187.  $[\alpha]_D^{20} = +25.7$  ( $c$  0.4, DCM). Chiral HPLC: Chiralpak AS-H, hexane: $i$ PrOH = 60:40, 0.5 mL/min, 270 nm;  $t_R = 22.3$  min (minor), 48.9 min (major).

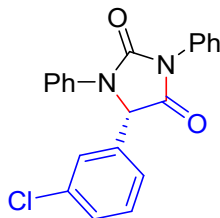

**(S)-5-(3-chlorophenyl)-1,3-diphenylimidazolidine-2,4-dione (3bi).**

Product **3bi** was obtained by flash chromatography (PE:EA = 5:1) in 95% yield as white solid. 34.3 mg. 85% ee. M.p.: 135-136 °C.  $^1\text{H NMR}$  ( $\text{CDCl}_3$ )  $\delta$ : 7.56-7.36 (m, 8H), 7.36-7.26 (m, 5H), 7.17-7.11 (m, 1H), 5.58 (s, 1H);  $^{13}\text{C NMR}$  ( $\text{CDCl}_3$ )  $\delta$ : 168.3, 153.5, 136.1, 135.4, 134.9, 131.3, 130.7, 129.6, 129.4, 129.2, 128.6, 127.2, 126.3, 125.3, 125.0, 120.6, 63.5. HRMS (ESI)  $m/z$  calcd for  $\text{C}_{21}\text{H}_{16}\text{ClN}_2\text{O}_2^+$  ( $\text{M}+\text{H}$ ) $^+$  363.0895, found 363.0894.  $[\alpha]_D^{20} = +27.5$  ( $c$  0.4, DCM). Chiral HPLC:



Chiralpak AS-H, hexane:*i*PrOH = 60:40, 0.5 mL/min, 270 nm; tR = 26.8 min (minor), 42.1 min (major).

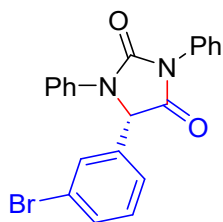

**(S)-5-(3-bromophenyl)-1,3-diphenylimidazolidine-2,4-dione (3bj).**

Product **3bj** was obtained by flash chromatography (PE:EA = 5:1) in quantitative yield as white solid. 41.0 mg. 81% ee. M.p.: 138-139 °C. <sup>1</sup>H NMR (CDCl<sub>3</sub>) δ: 7.58 (t, *J* = 1.7 Hz, 1H), 7.54-7.36 (m, 8H), 7.36-7.28 (m, 3H), 7.25 (t, *J* = 7.8 Hz, 1H), 7.17-7.10 (m, 1H), 5.57 (s, 1H); <sup>13</sup>C NMR (CDCl<sub>3</sub>) δ: 168.3, 153.5, 136.1, 135.1, 132.6, 131.3, 130.9, 130.0, 129.4, 129.2, 128.6, 126.3, 125.4, 125.3, 123.5, 120.6, 63.4. HRMS (ESI) *m/z* calcd for C<sub>21</sub>H<sub>16</sub>BrN<sub>2</sub>O<sub>2</sub><sup>+</sup> (M+H)<sup>+</sup> 407.0390, found 407.0387. [α]<sub>D</sub><sup>20</sup> = +25.7 (*c* 0.4, DCM). Chiral HPLC: Chiralpak AS-H, hexane:*i*PrOH = 60:40, 0.5 mL/min, 254 nm; tR = 26.6 min (minor), 56.3 min (major).

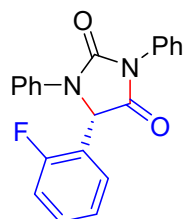

**(S)-5-(2-fluorophenyl)-1,3-diphenylimidazolidine-2,4-dione (3bk).**

Product **3bk** was obtained by flash chromatography (PE:EA = 5:1) in quantitative yield as white solid. 35.2 mg. 80% ee. M.p.: 74-74 °C. <sup>1</sup>H NMR (CDCl<sub>3</sub>) δ: 7.53-7.44 (m, 6H), 7.44-7.37 (m, 1H), 7.35-7.26 (m, 4H), 7.15-7.06 (m, 3H), 5.86 (s, 1H); <sup>13</sup>C NMR (CDCl<sub>3</sub>) δ: 168.7, 163.2 (d, *J* = 249.5 Hz), 153.6, 135.8, 131.5, 131.4 (d, *J* = 8.4 Hz), 129.6 (d, *J* = 2.8 Hz), 129.2, 129.2, 128.6, 126.5, 125.6, 124.9 (d, *J* = 3.6 Hz), 121.6, 116.5 (d, *J* = 20.8 Hz), 59.8 (d, *J* = 1.5 Hz); <sup>19</sup>F NMR (CDCl<sub>3</sub>): -117.9. [α]<sub>D</sub><sup>20</sup> = +20.0 (*c* 0.1, DCM). Chiral HPLC: Chiralpak AD-H, hexane:*i*PrOH = 60:40, 0.5 mL/min, 254 nm; tR = 38.4 min (minor), 89.6 min (major).

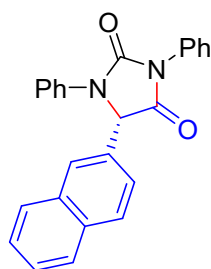

**(S)-5-(naphthalen-2-yl)-1,3-diphenylimidazolidine-2,4-dione (3bl).**

Product **3bl** was obtained by flash chromatography (PE:EA = 5:1) in 98% yield as white solid. 37.2 mg. 71% ee. M.p.: 158-160 °C. <sup>1</sup>H NMR (CDCl<sub>3</sub>) δ: 7.89 (s, 1H), 7.86 (t, *J* = 8.5 Hz, 1H), 7.83-7.77 (m, 2H), 7.57 (d, *J* = 8.4 Hz, 1H), 7.52-7.41 (m, 7H), 7.41-7.33 (m, 1H), 7.30-7.21 (m, 2H), 7.07 (t, *J* = 7.3 Hz, 1H), 5.75 (s, 1H); <sup>13</sup>C NMR (CDCl<sub>3</sub>) δ: 169.0, 153.7, 136.4, 133.6, 133.3, 131.5, 130.4, 129.6, 129.2, 129.2, 128.5, 128.1, 127.9, 127.1, 126.9, 126.8, 126.4, 125.1, 123.4, 120.7, 64.4. HRMS (ESI) *m/z* calcd for C<sub>25</sub>H<sub>18</sub>N<sub>2</sub>O<sub>2</sub>Na<sup>+</sup> (M+Na)<sup>+</sup> 401.1260, found 401.1258. [α]<sub>D</sub><sup>20</sup> = +8.8 (*c*

0.4, DCM). Chiral HPLC: Chiralpak AS-H, hexane:*i*PrOH = 60:40, 0.5 mL/min, 270 nm; tR = 28.1 min (minor), 50.1 min (major).

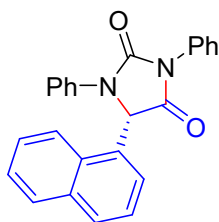

**(S)-5-(naphthalen-1-yl)-1,3-diphenylimidazolidine-2,4-dione (3bm).**

Product **3bm** was obtained by flash chromatography (PE:EA = 5:1) in 86% yield as white solid. 32.5 mg. 60% ee. M.p.: 170-171 °C. <sup>1</sup>H NMR (CDCl<sub>3</sub>) δ: 8.36 (br, s, 1H), 7.90 (d, *J* = 8.1 Hz, 1H), 7.83 (d, *J* = 8.2 Hz, 1H), 7.70-7.61 (m, 1H), 7.56 (t, *J* = 7.5 Hz, 1H), 7.54-7.42 (m, 7H), 7.41-7.35 (m, 2H), 7.22 (t, *J* = 8.4 Hz, 2H), 7.05 (t, *J* = 7.4 Hz, 1H), 6.51 (br, s, 1H), 5.75 (s, 1H); <sup>13</sup>C NMR (CDCl<sub>3</sub>) δ: 168.8, 153.8, 136.4, 134.5, 131.5, 131.3, 129.9, 129.2, 129.1, 128.5, 127.2, 126.4, 126.4, 125.4, 124.9, 123.4, 120.0, 59.9. HRMS (ESI) *m/z* calcd for C<sub>25</sub>H<sub>19</sub>N<sub>2</sub>O<sub>2</sub><sup>+</sup> (M+H)<sup>+</sup> 379.1441, found 379.1443. [α]<sub>D</sub><sup>20</sup> = +37.8 (*c* 0.3, DCM). Chiral HPLC: Chiralpak AS-H, hexane:*i*PrOH = 60:40, 0.5 mL/min, 270 nm; tR = 22.2 min (minor), 33.6 min (major).

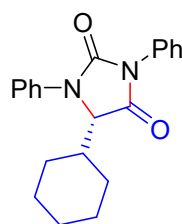

**(S)-5-cyclohexyl-1,3-diphenylimidazolidine-2,4-dione (3bn).**

Product **3bn** was obtained by flash chromatography (PE:EA = 5:1) in 98% yield as colorless oil. 32.8 mg. 92% ee. <sup>1</sup>H NMR (CDCl<sub>3</sub>) δ: 7.51-7.34 (m, 9H), 7.29-7.24 (m, 1H), 4.58 (d, *J* = 2.8 Hz, 1H), 2.03-1.92 (m, 1H), 1.84-1.59 (m, 6H), 1.28-0.96 (m, 4H); <sup>13</sup>C NMR (CDCl<sub>3</sub>) δ: 170.5, 153.7, 135.7, 132.0, 131.5, 129.4, 129.1, 128.4, 126.4, 125.9, 122.9, 64.5, 39.0, 27.9, 26.8, 26.2, 25.9. [α]<sub>D</sub><sup>20</sup> = +6.7 (*c* 0.1, DCM). Chiral HPLC: Chiralpak AD-H, hexane:*i*PrOH = 60:40, 0.5 mL/min, 254 nm; tR = 26.1 min (major), 35.9 min (minor).

**IV. Control experiments**

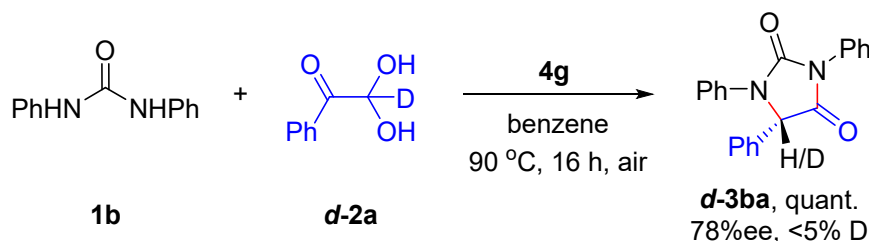

The 1-deuterated phenylglyoxal monohydrate (**d-2a**) was synthesized according to reference.<sup>4</sup> The urea **1b** (1.2 mmol), **d-2a** (0.1 mmol) and **4g** (10 mol %) was dissolved in benzene (2 mL). The reaction mixture was stirred at 90 °C for 16 h. The product was separated by flash column chromatography (PE:EA = 5:1) on silica gel to afford compound **d-3ba** (35.1 mg, <5%D) in quant yield.

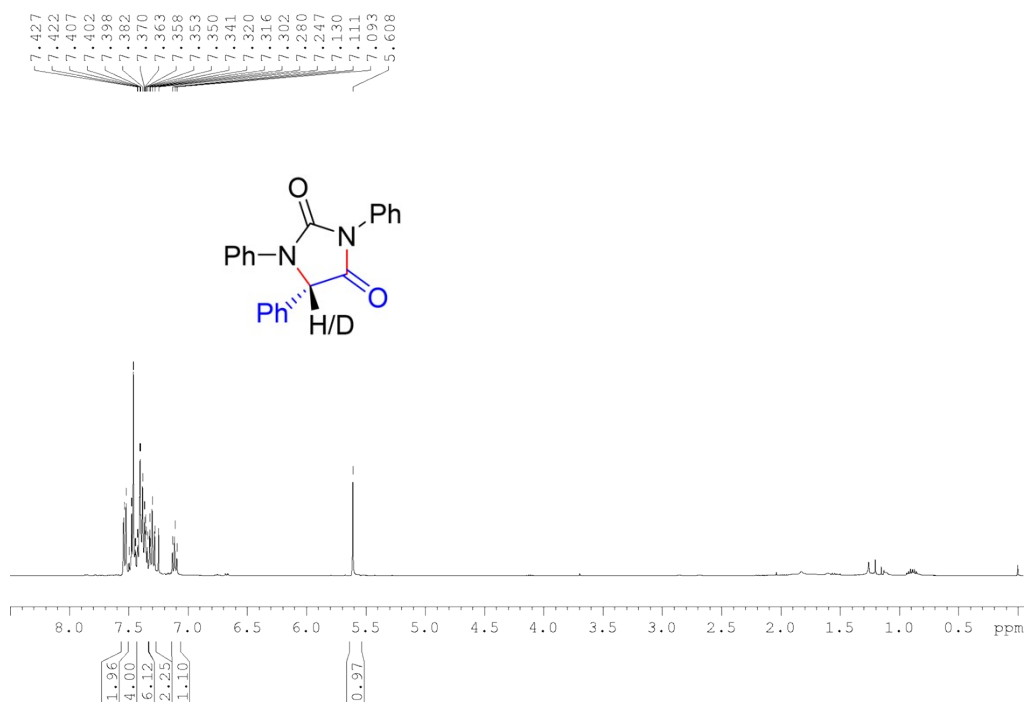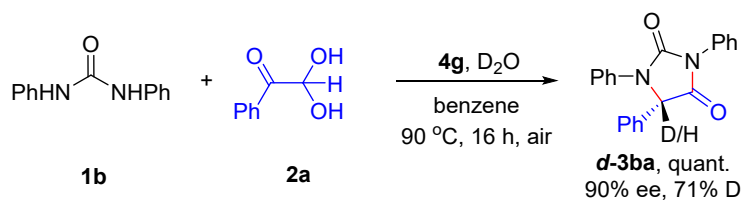

The urea **1b** (1.2 mmol), **2a** (0.1 mmol) and **4g** (10 mol %) was dissolved in benzene (2 mL). The D<sub>2</sub>O (4.0 equiv) was added into the mixture. The reaction mixture was stirred at 90 °C for 16 h. The product was separated by flash column chromatography (PE:EA = 5:1) on silica gel to afford compound **d-3ba** (33.4 mg, 71%D) in quant yield.

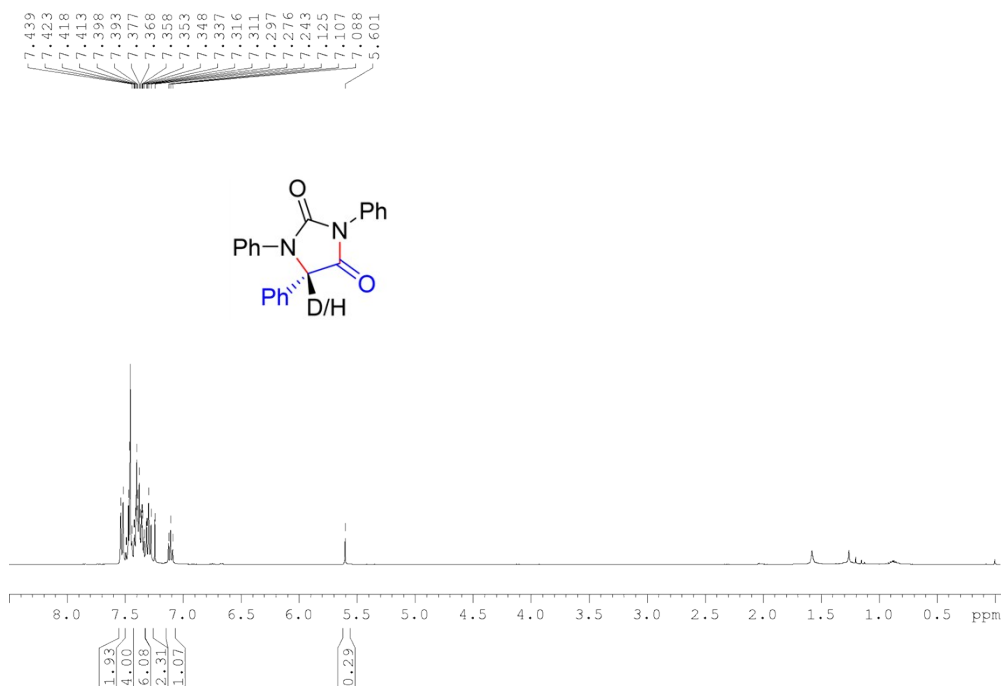

## V. Gram-scale Synthesis and Further Chemical Transformations

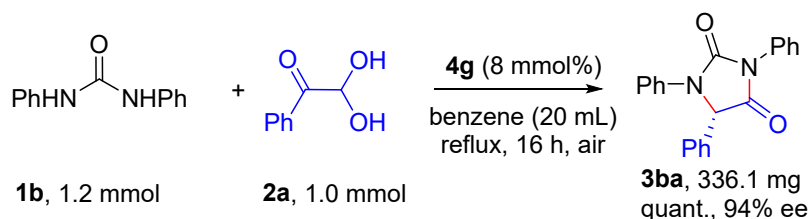

The *N,N'*-diphenylurea **1b** (1.2 mmol), **2a** (1.0 mmol) and **4g** (8 mol %) was dissolved in benzene (20 mL). The reaction mixture was refluxed for 16 h. Then solvent was removed in vacuo and the crude product was separated by flash column chromatography on silica gel (PE:EA = 5:1) to afford products **3ba** in quantitative yield with 94% ee.

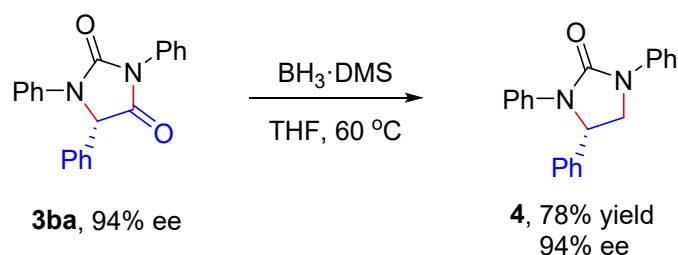

A solution of **3ba** (0.1 mmol) in THF (0.5 mL) was treated with borane-dimethyl sulfide complex (2 M in THF, 2 equiv) at 0 °C under N<sub>2</sub>. The resulting mixture was heated at 60 °C for 6 h and then cooled to 0 °C. The reaction was then quenched with MeOH (0.5 mL) at 0 °C. The solvent was removed under reduced pressure, and the crude product was purified by silica gel column chromatography (PE:EA = 5:1) to afford white solid (24.6 mg) in 78% yield. (*S*)-1,3,4-triphenylimidazolidin-2-one (**4**): white solid, m.p.: 150-152 °C, 94% ee; <sup>1</sup>H NMR (CDCl<sub>3</sub>) δ: 7.58 (d, *J* = 8.4 Hz, 2H), 7.43 (d, *J* = 8.2 Hz, 2H), 7.40-7.31 (m, 6H), 7.30-7.19 (m, 3H), 7.08 (t, *J* = 7.3 Hz, 1H), 7.01 (t, *J* = 7.3 Hz, 1H), 5.32 (dd, *J* = 9.2, 5.9 Hz, 1H), 4.33 (t, *J* = 9.0 Hz, 1H), 3.72 (dd, *J* = 9.0, 5.9 Hz, 1H); <sup>13</sup>C NMR (CDCl<sub>3</sub>) δ: 155.5, 140.0, 139.8, 138.7, 129.2, 128.9, 128.7, 128.4, 126.2, 123.7, 123.2, 120.8, 118.2, 57.3, 51.6. HRMS (ESI) *m/z* calcd for C<sub>21</sub>H<sub>19</sub>N<sub>2</sub>O<sup>+</sup> (M+H)<sup>+</sup> 315.1492, found 315.1493. [α]<sub>D</sub><sup>20</sup> = -30.5 (*c* 0.2, DCM). Chiral HPLC: Chiralpak AS-H, hexane:PrOH = 80:20, 1.0 mL/min, 254 nm; t<sub>R</sub> = 12.5 min (major), 14.3 min (minor).

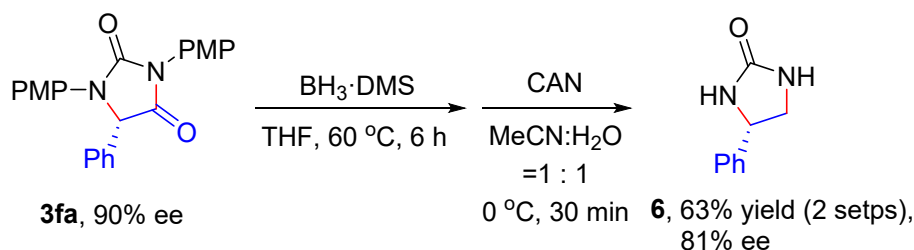

A solution of **3fa** (0.1 mmol) in THF (0.5 mL) was treated with borane-dimethyl sulfide complex (2 M in THF, 2 equiv) at 0 °C under N<sub>2</sub>. The resulting mixture was heated at 60 °C for 6 h and then cooled to 0 °C. The reaction was then quenched with MeOH (0.5 mL) at 0 °C. The solvent was removed under reduced pressure, and the crude product was purified by silica gel column

chromatography (PE:EA = 3:1) to afford white solid. To a solution of the white solid in MeCN (1.5 mL), was added a solution of CAN in water (1.5 mL) slowly in 30 min at 0 °C. Then the solution was extracted with EA, and dried with Na<sub>2</sub>SO<sub>4</sub>. Then solvent was removed in vacuo and the crude product was separated by flash column chromatography on silica gel (DCM:MeOH = 95:5) to afford products **6** in 63% yield with 81% ee. **(S)-4-phenylimidazolidin-2-one (6)**:<sup>5</sup> yellow solid, m.p.: 126-128 °C, 81% ee; <sup>1</sup>H NMR (CDCl<sub>3</sub>) δ: 7.42-7.29 (m, 5H), 5.09 (br, s, 1H), 4.93 (br, s, 1H), 4.88 (t, *J* = 8.2 Hz, 1H), 3.87 (t, *J* = 8.8 Hz, 1H), 3.35 (t, *J* = 8.1 Hz, 1H); <sup>13</sup>C NMR (CDCl<sub>3</sub>) δ: 141.3, 128.9, 128.3, 126.1, 56.7, 49.6. [α]<sub>D</sub><sup>20</sup> = +19.3 (*c* 0.1, DCM). Chiral HPLC: Chiralpak IB-3, hexane:PrOH = 80:20, 1.0 mL/min, 210 nm; tR = 9.0 min (major), 9.8 min (minor).

## VI. References

- (1) Wang, M.; Han, J.; Si, X.; Hu, Y.; Zhu, J.; Sun, X., Effective approach to ureas through organocatalyzed one-pot process. *Tetrahedron Lett.* **2018**, *59*, 1614-1618.
- (2) Han, G. H.; Kim, S. Y.; Lee, H. R.; Lee, J. S.; Park, Y. S., A Convenient One-Pot Synthesis of Both Enantiomers of 1,3,5-Trisubstituted Hydantoins. *Synlett* **2020**, *31*, 171-174.
- (3) Xu, Z.-G.; Ding, Y.; Meng, J.-P.; Tang, D.-Y.; Li, Y.; Lei, J.; Xu, C.; Chen, Z.-Z., Facile Construction of Hydantoin Scaffolds via a Post-Ugi Cascade Reaction. *Synlett* **2018**, *29*, 2199-2202.
- (4) Marchand, N. J.; Grée, D. M.; Martelli, J. T.; Grée, R. L.; Toupet, L. J., Synthesis and Reactivity of Cross-Conjugated Polyenones with a Planar Chirality. *J. Org. Chem.* **1996**, *61*, 5063-5072.
- (5) Zhou, Z.; Tan, Y.; Yamahira, T.; Ivlev, S.; Xie, X.; Riedel, R.; Hemming, M.; Kimura, M.; Meggers, E., Enantioselective Ring-Closing C–H Amination of Urea Derivatives. *Chem* **2020**, *6*, 2024-2034.

## VII. Copies of NMR Spectra

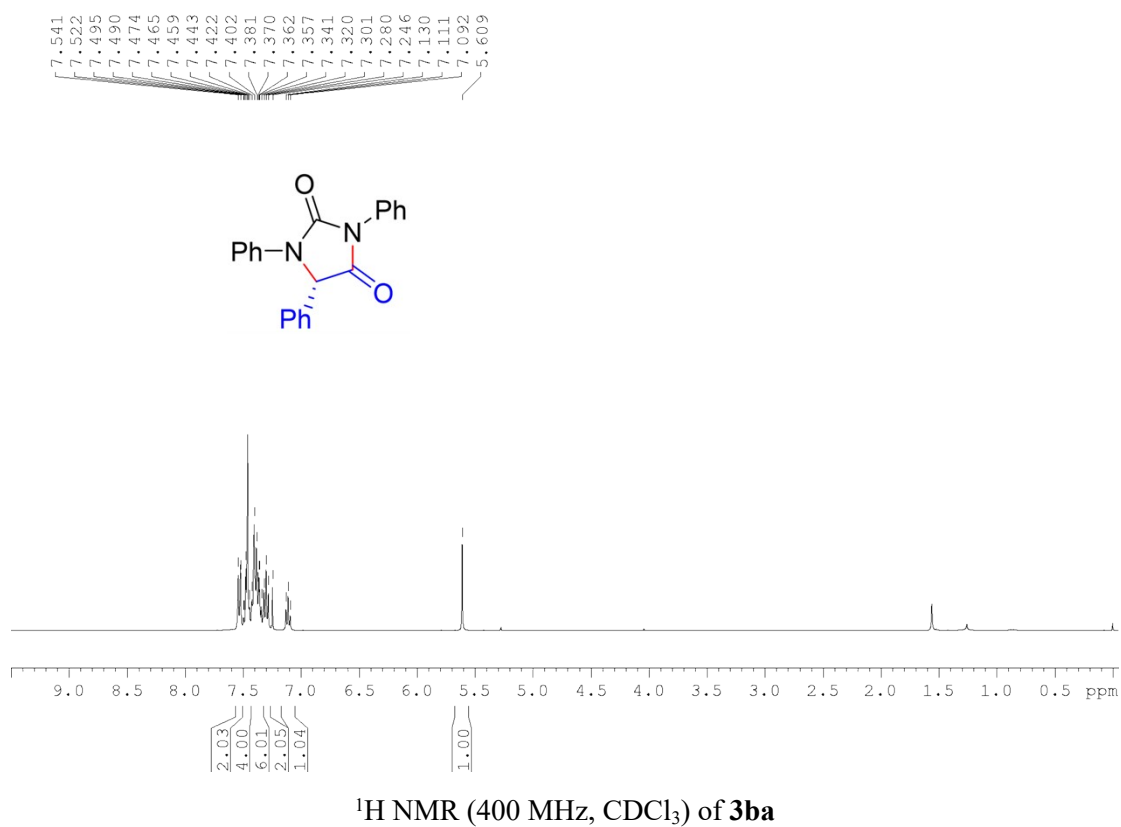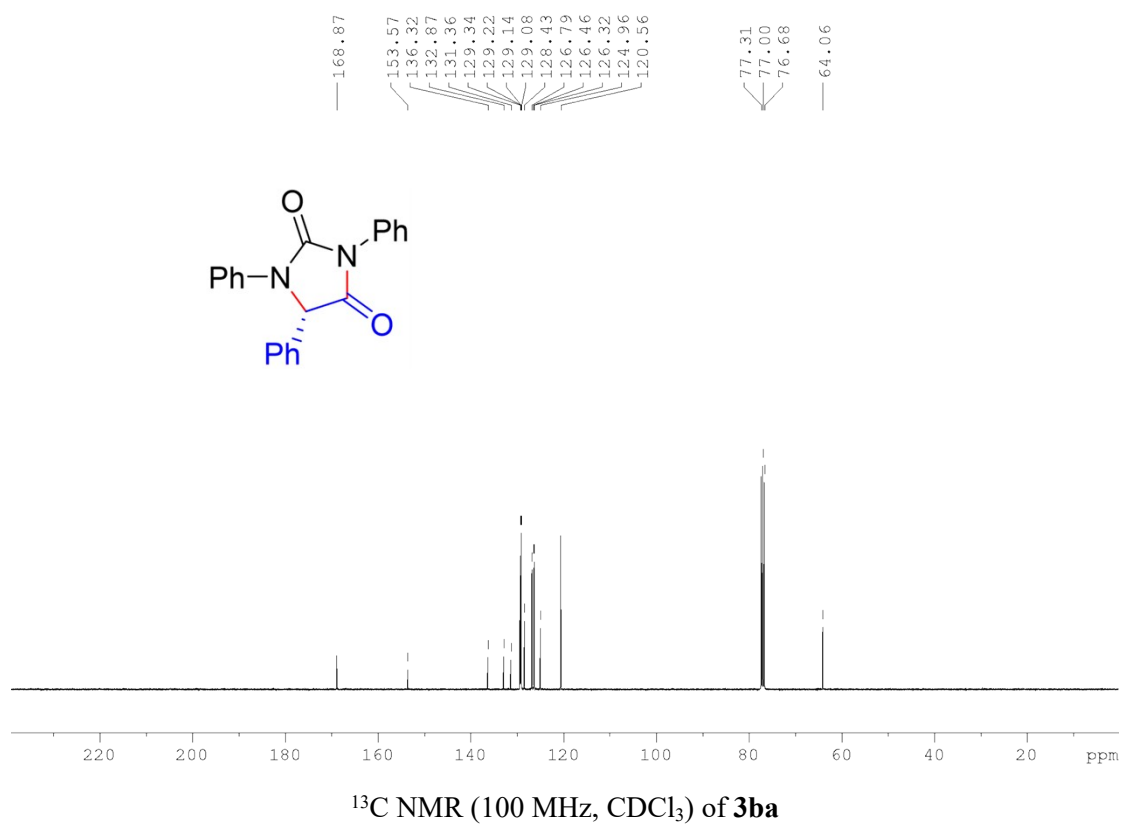

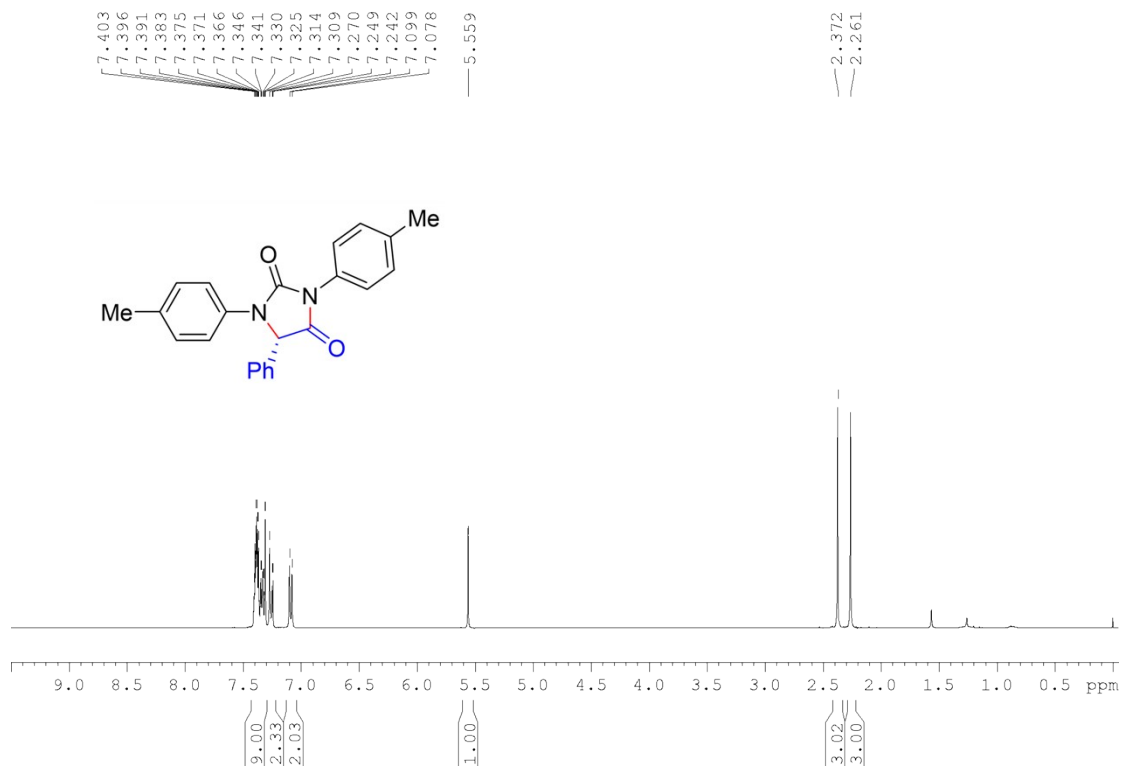

<sup>1</sup>H NMR (400 MHz, CDCl<sub>3</sub>) of 3ea

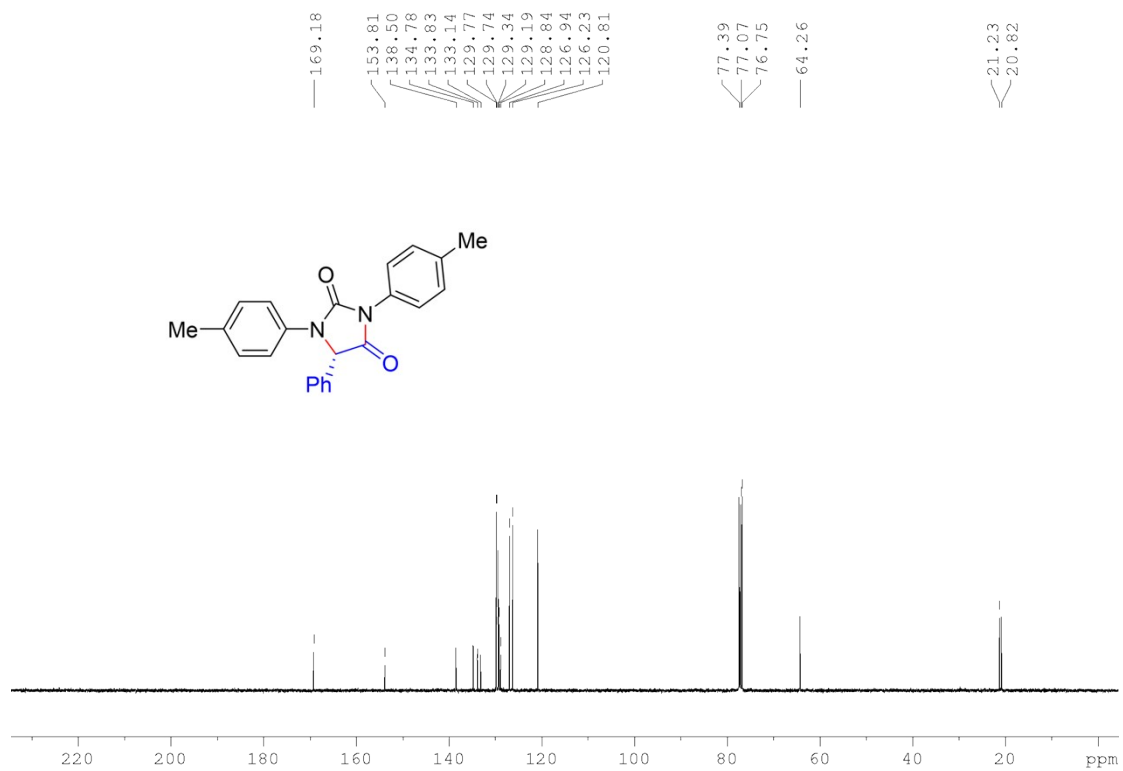

<sup>13</sup>C NMR (100 MHz, CDCl<sub>3</sub>) of 3ea

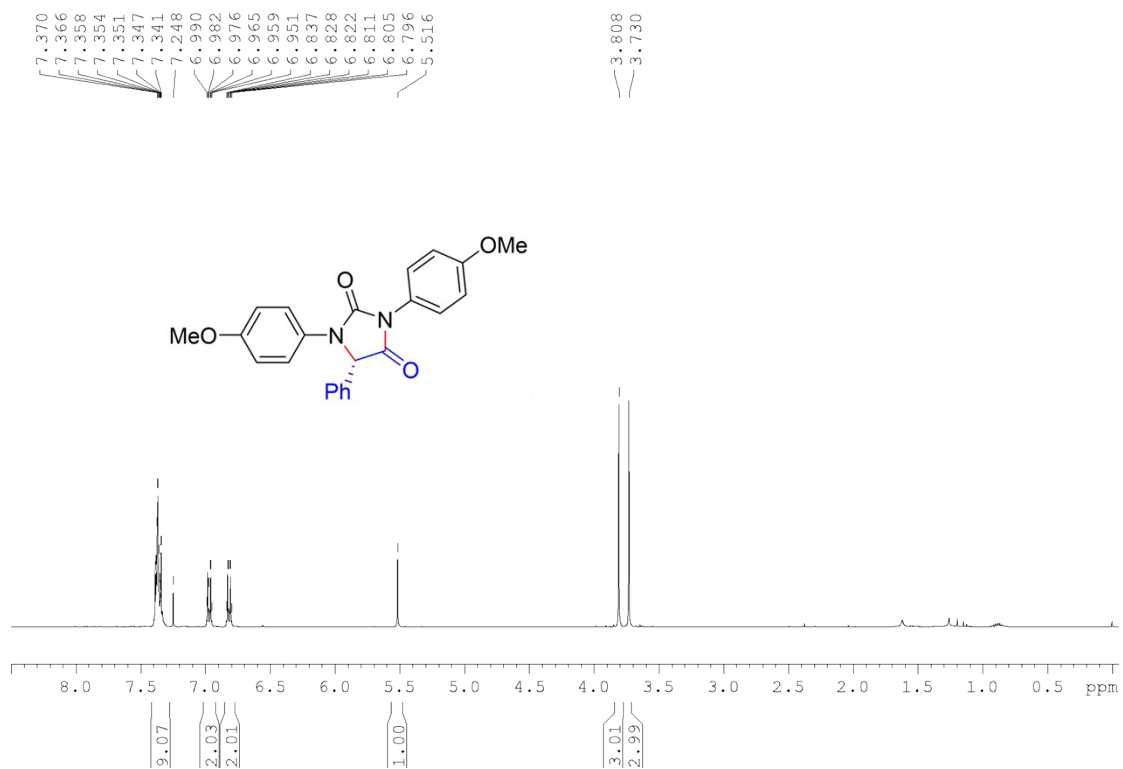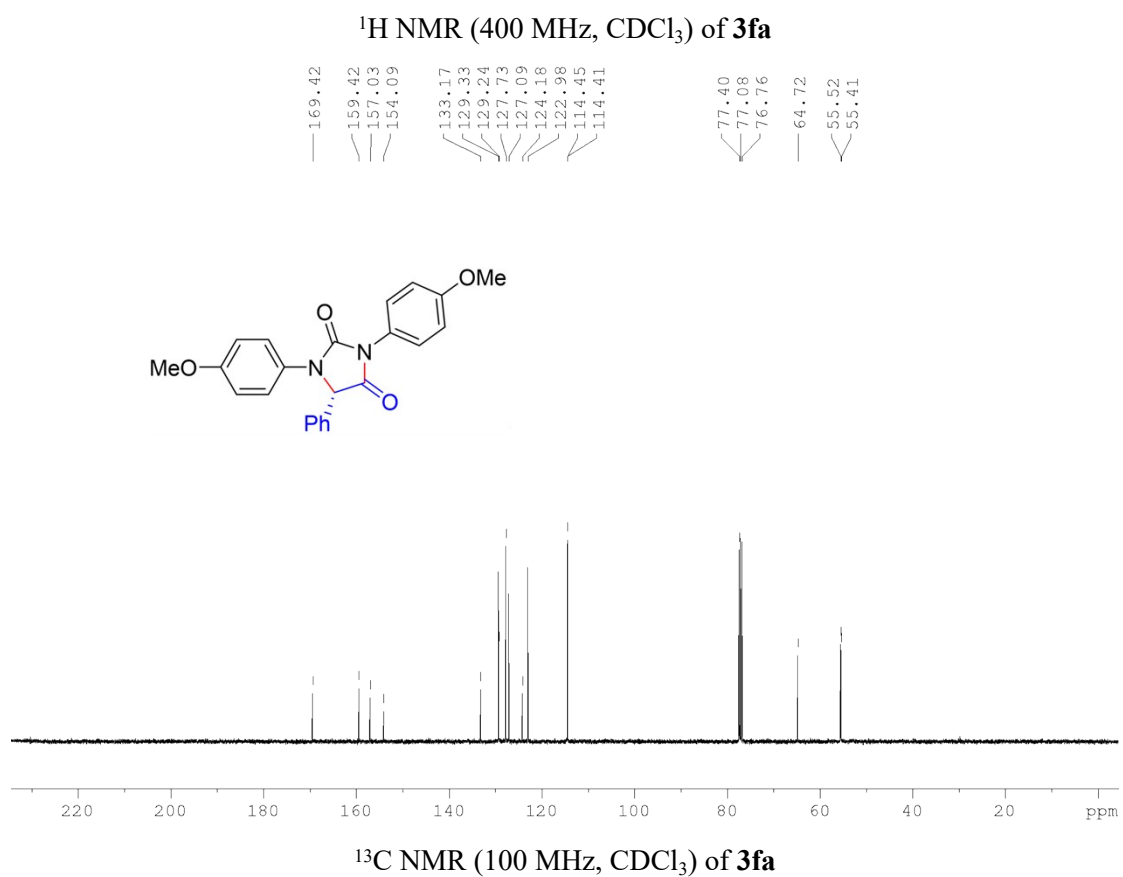



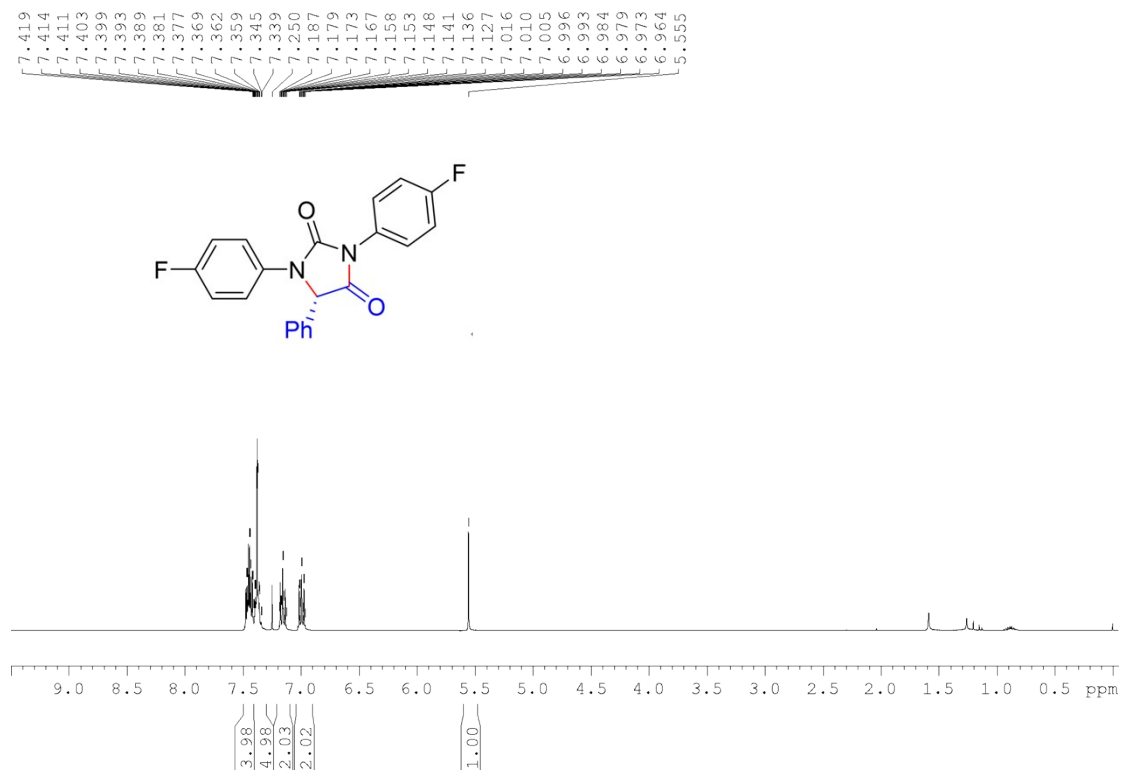

<sup>1</sup>H NMR (400 MHz, CDCl<sub>3</sub>) of **3ga**

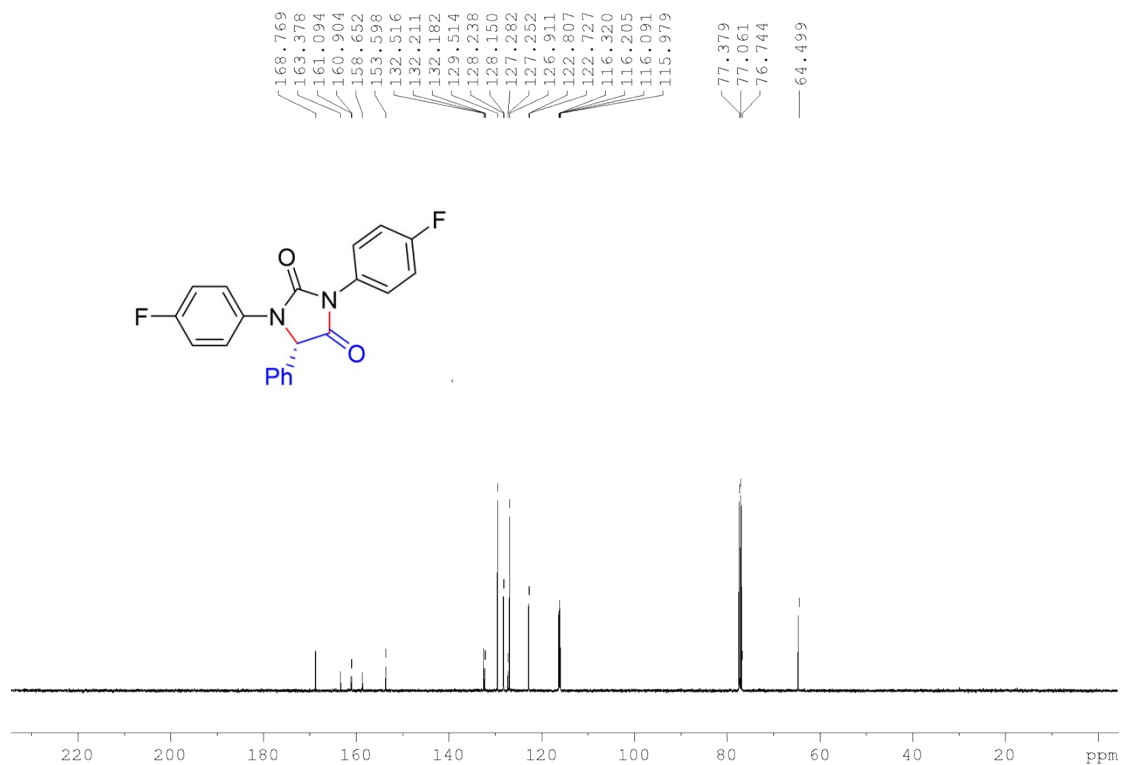

<sup>13</sup>C NMR (100 MHz, CDCl<sub>3</sub>) of **3ga**

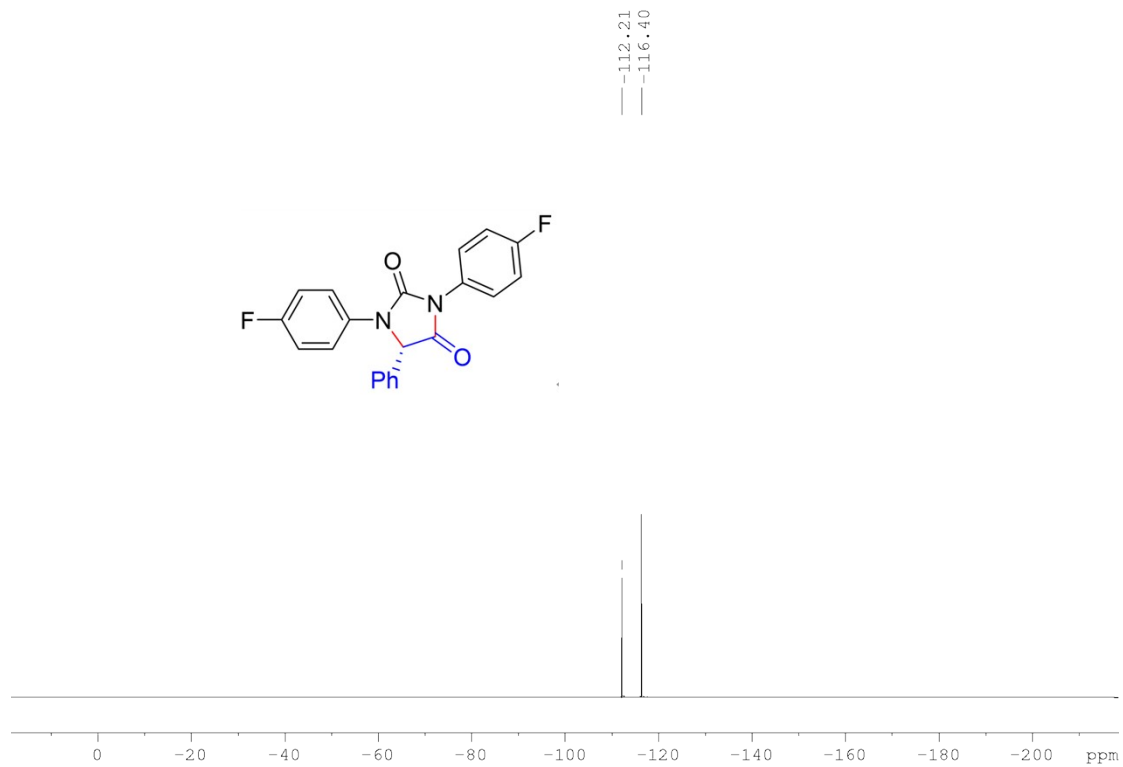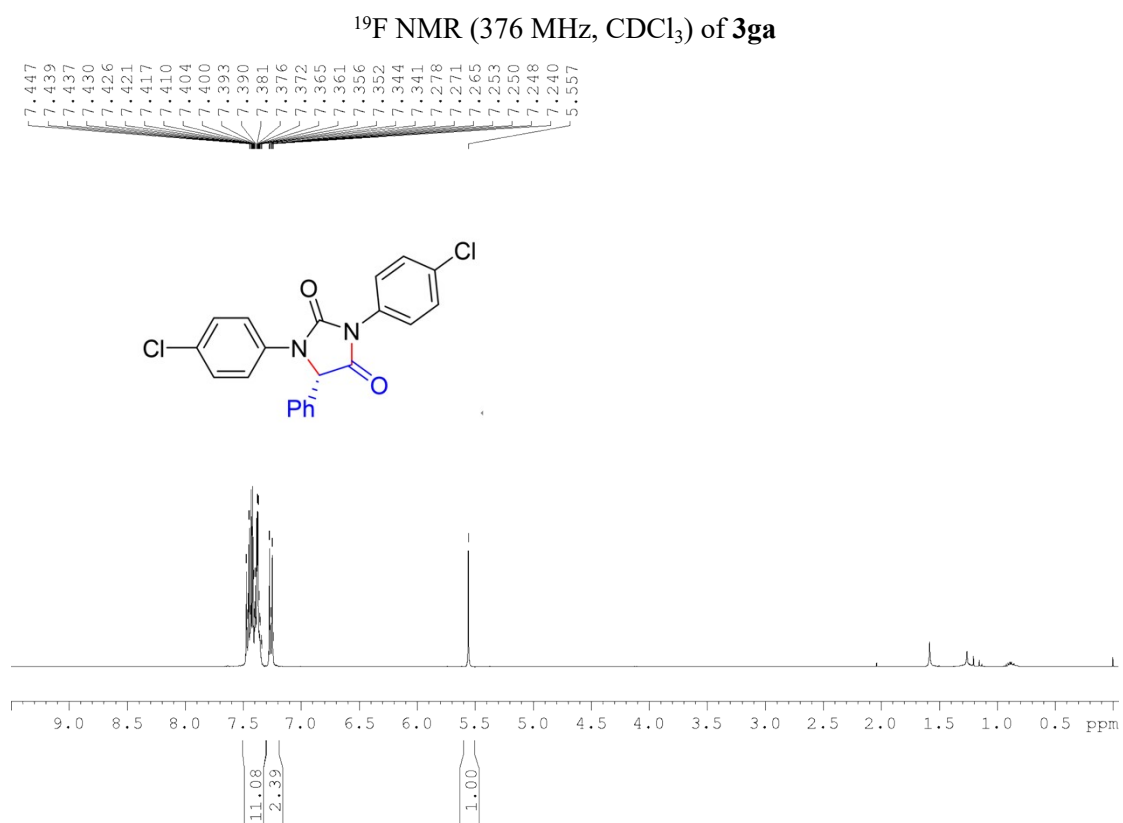

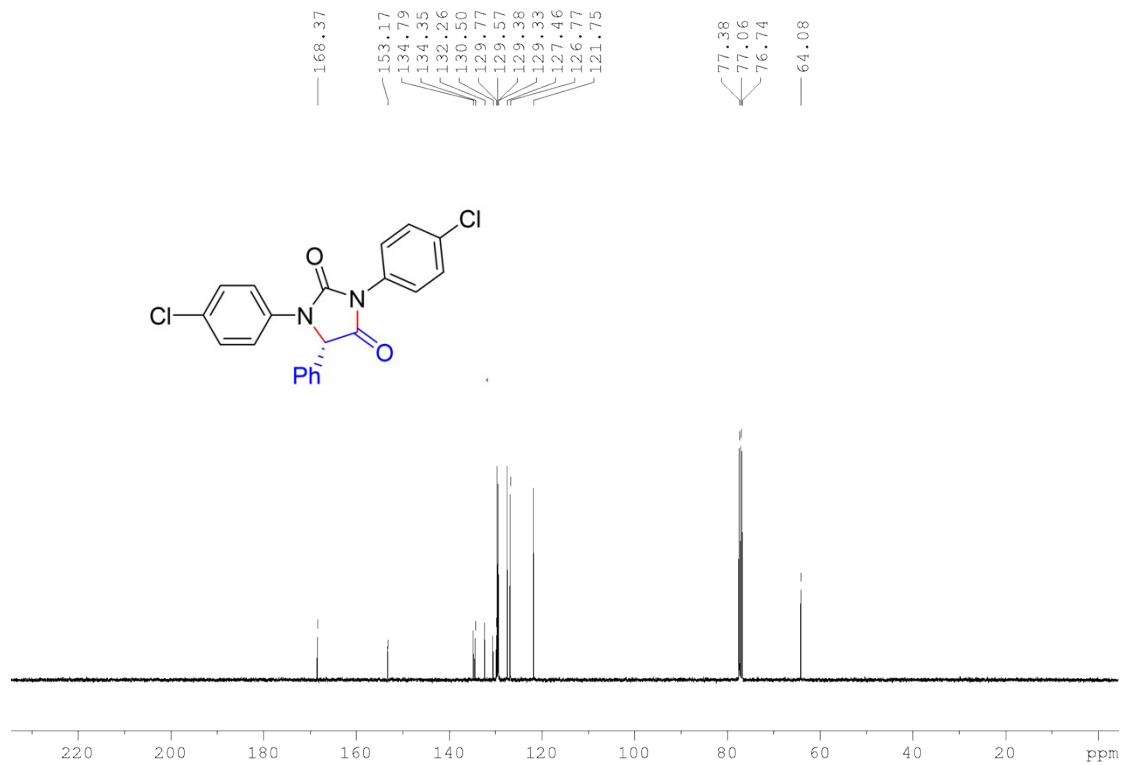

$^{13}\text{C}$  NMR (100 MHz,  $\text{CDCl}_3$ ) of **3ha**

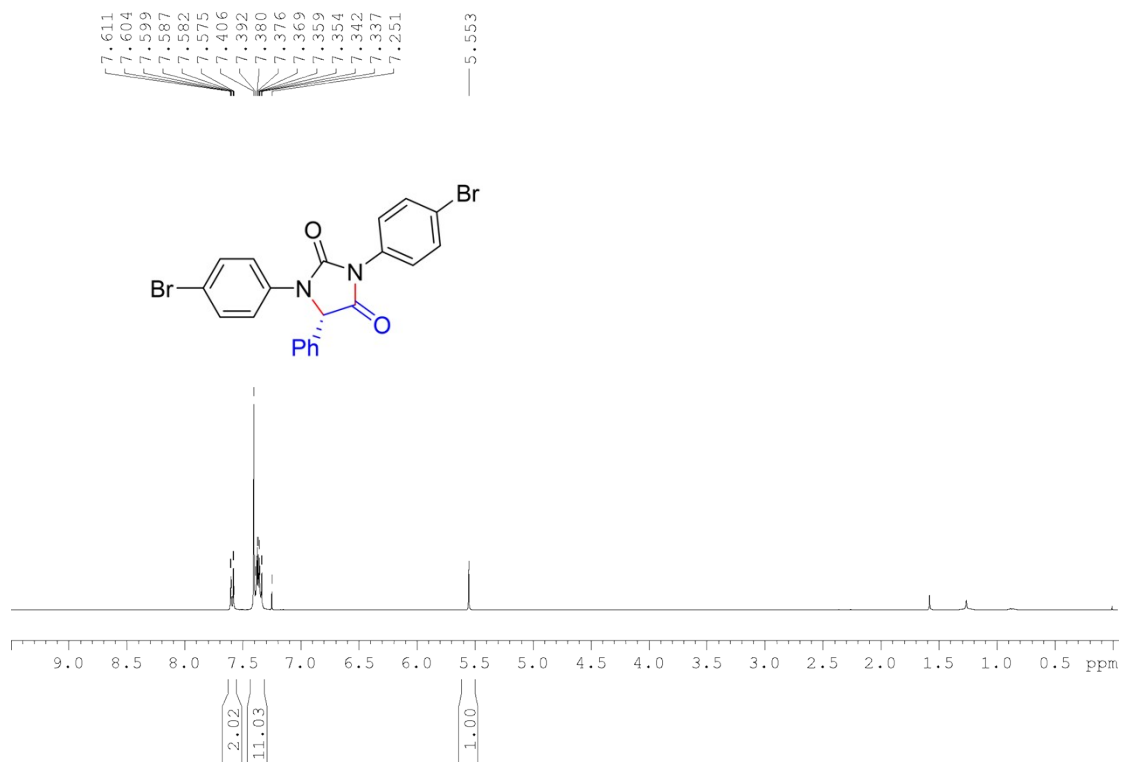

$^1\text{H}$  NMR (400 MHz,  $\text{CDCl}_3$ ) of **3ia**

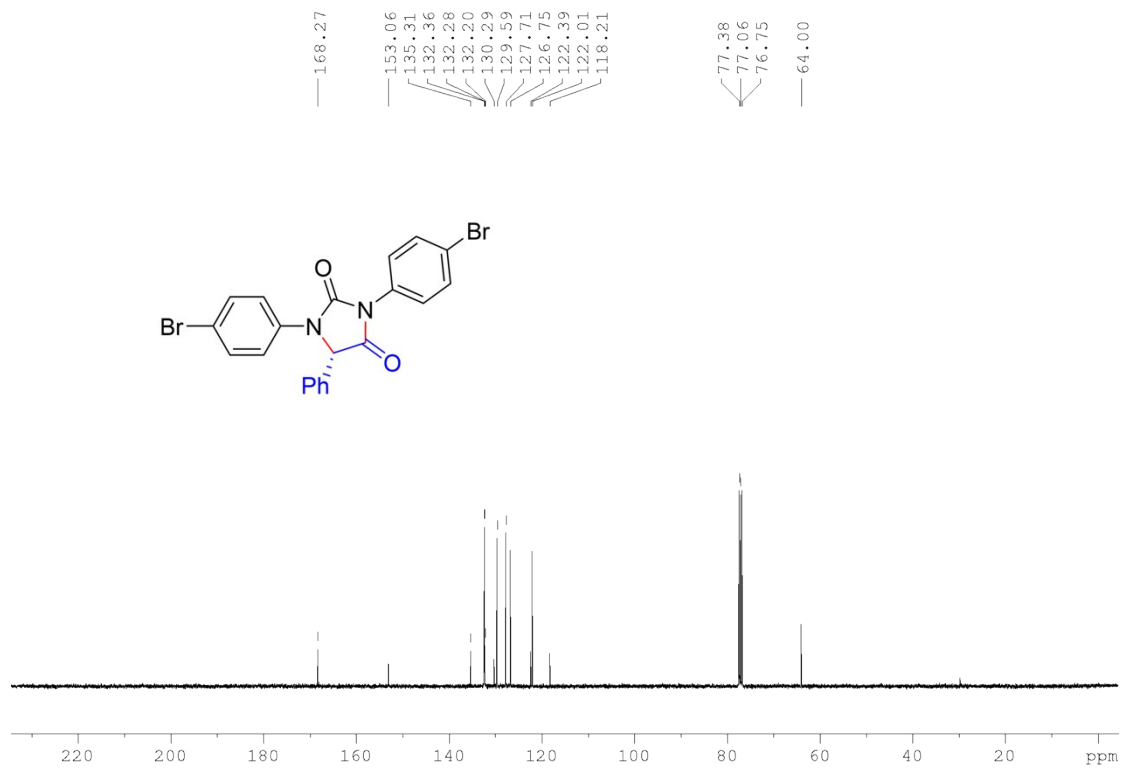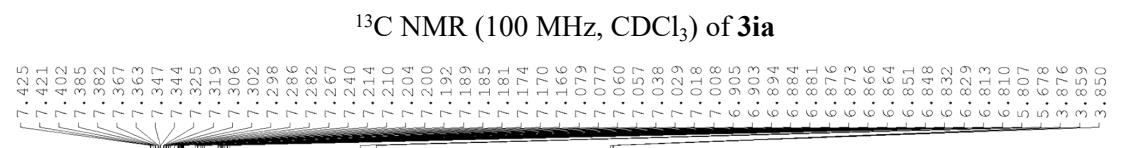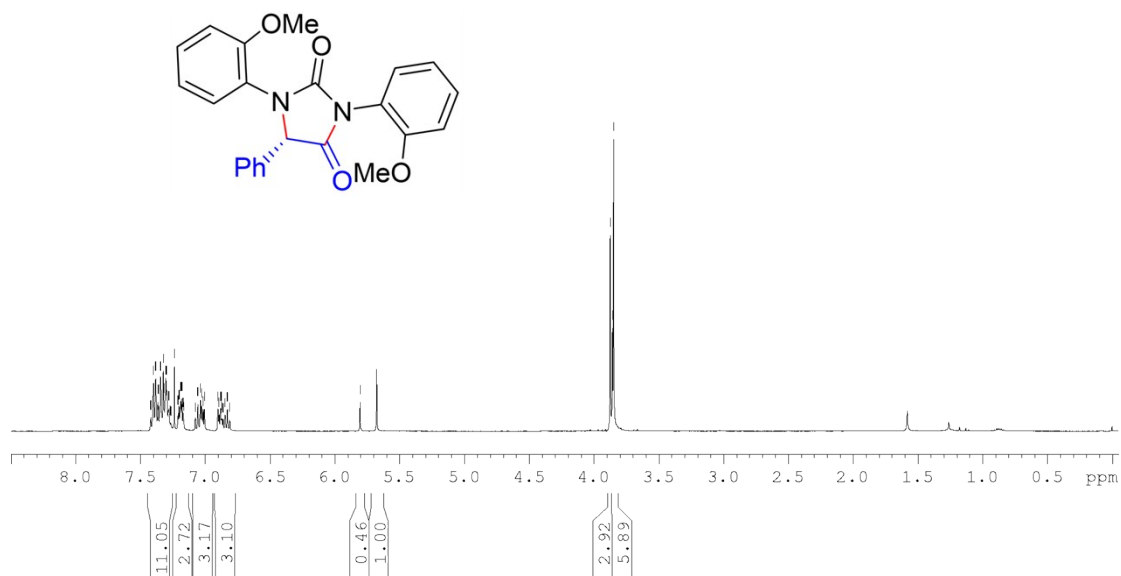

$^1\text{H}$  NMR (400 MHz,  $\text{CDCl}_3$ ) of **3ja**

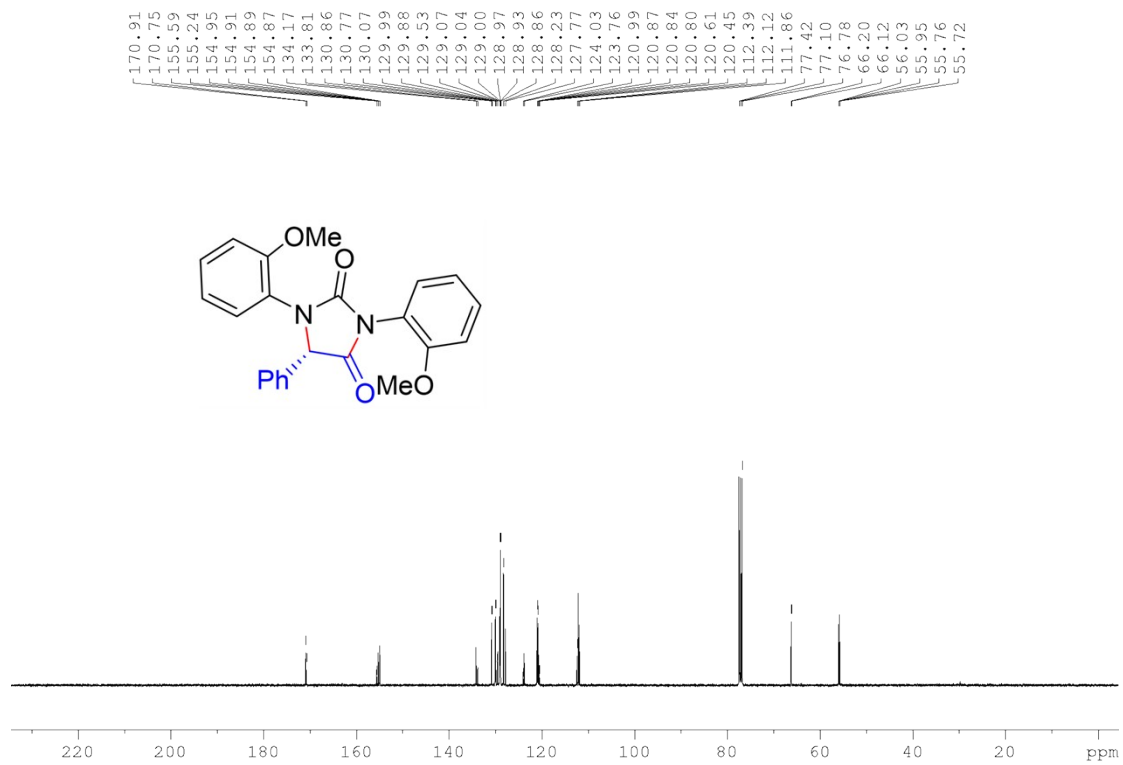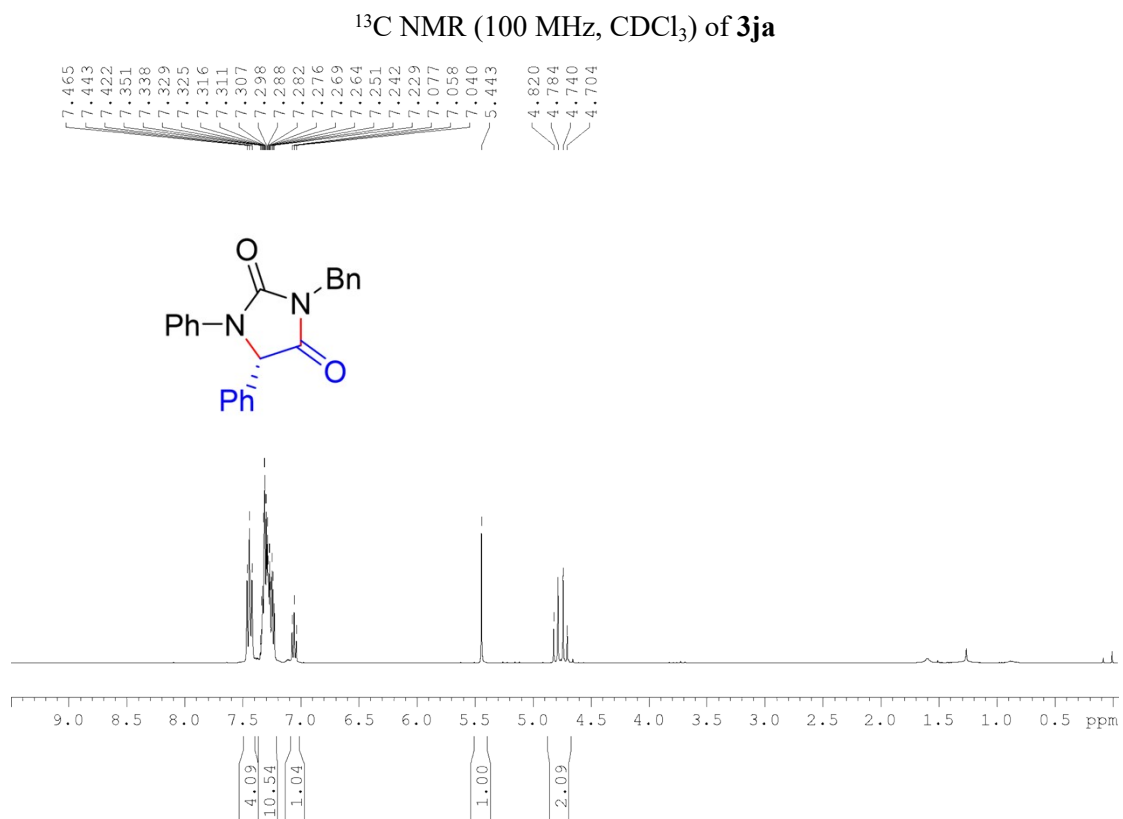

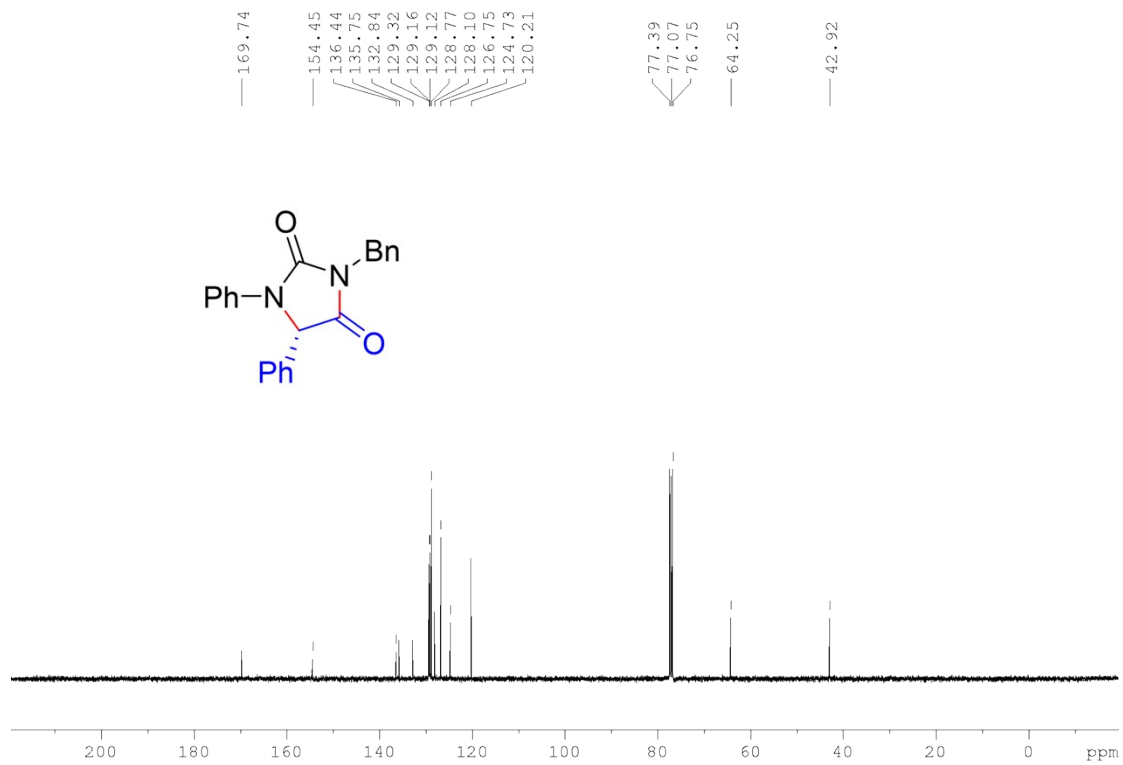

$^{13}\text{C}$  NMR (100 MHz,  $\text{CDCl}_3$ ) of **3ka**

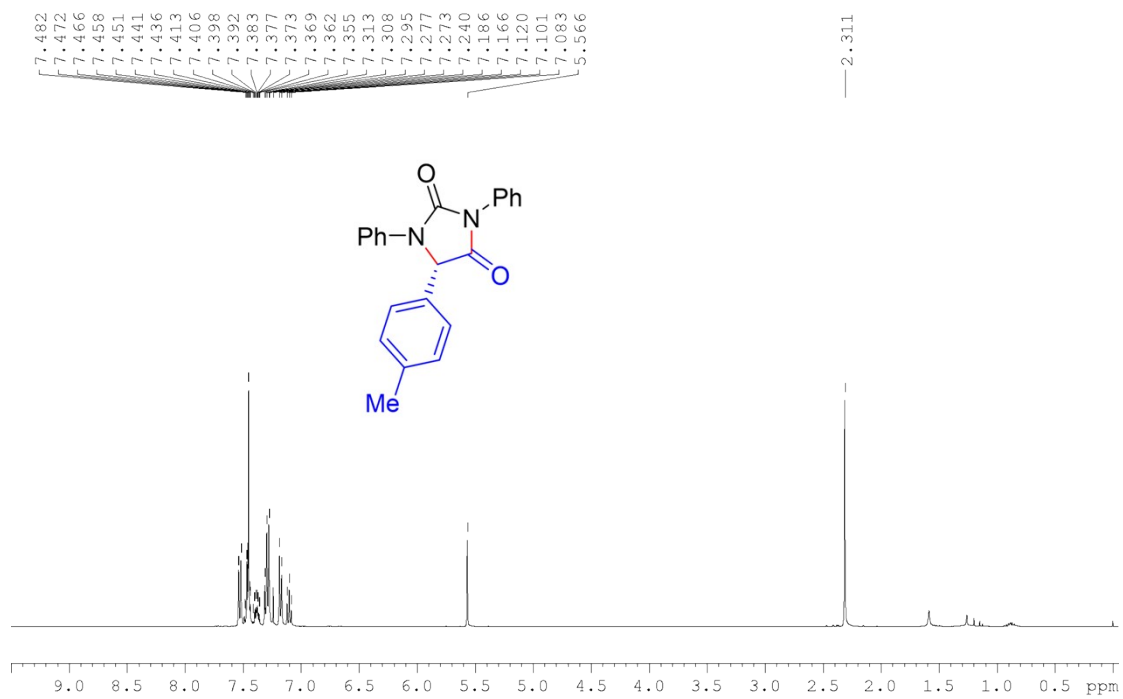

$^1\text{H}$  NMR (400 MHz,  $\text{CDCl}_3$ ) of **3bb**

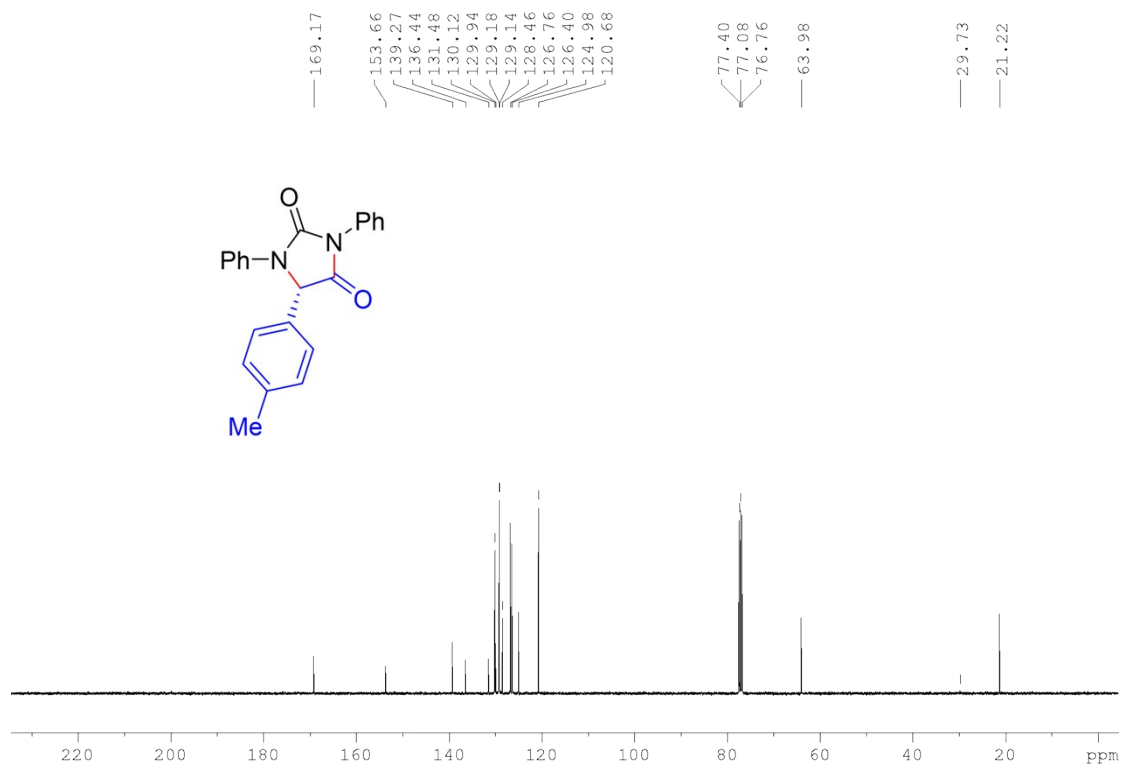

$^{13}\text{C}$  NMR (100 MHz,  $\text{CDCl}_3$ ) of **3bb**

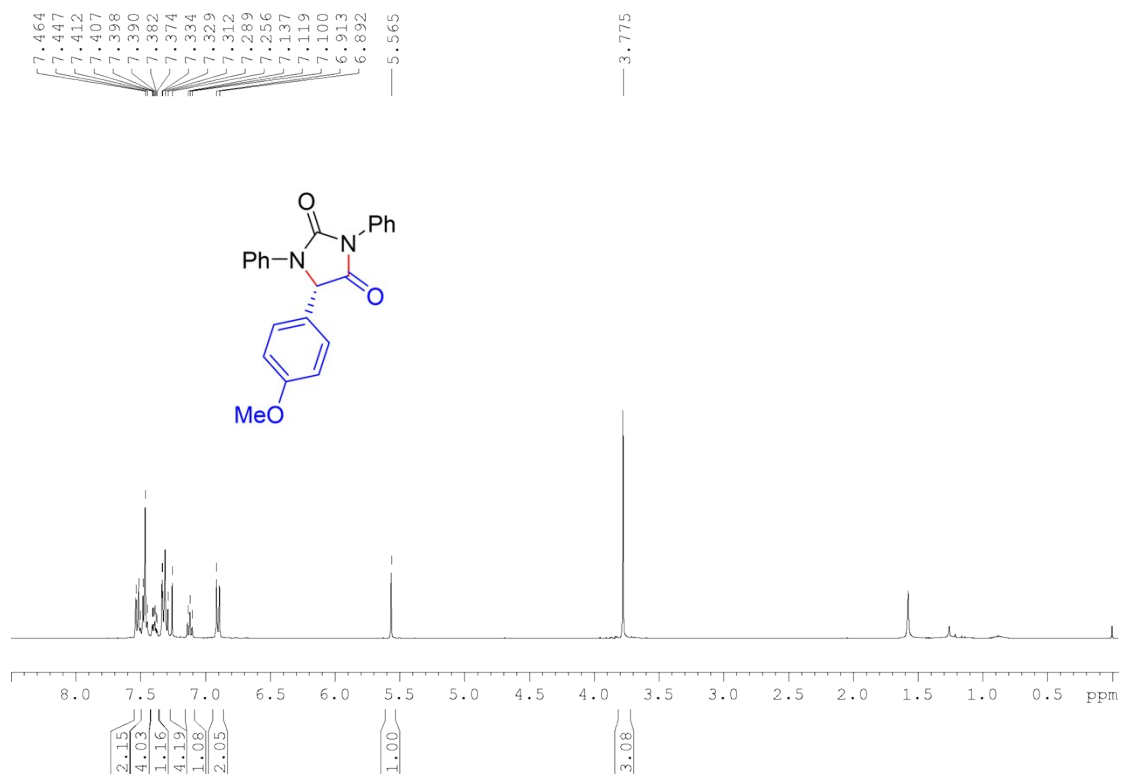

$^1\text{H}$  NMR (400 MHz,  $\text{CDCl}_3$ ) of **3bc**

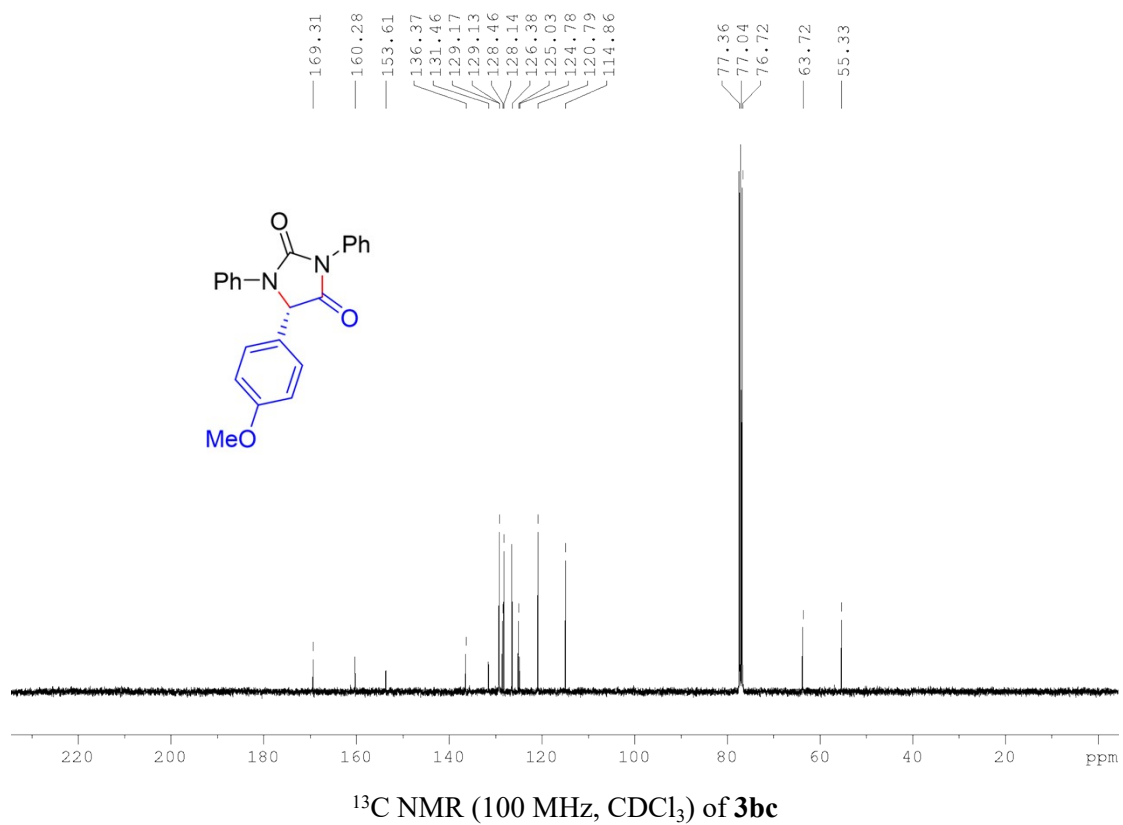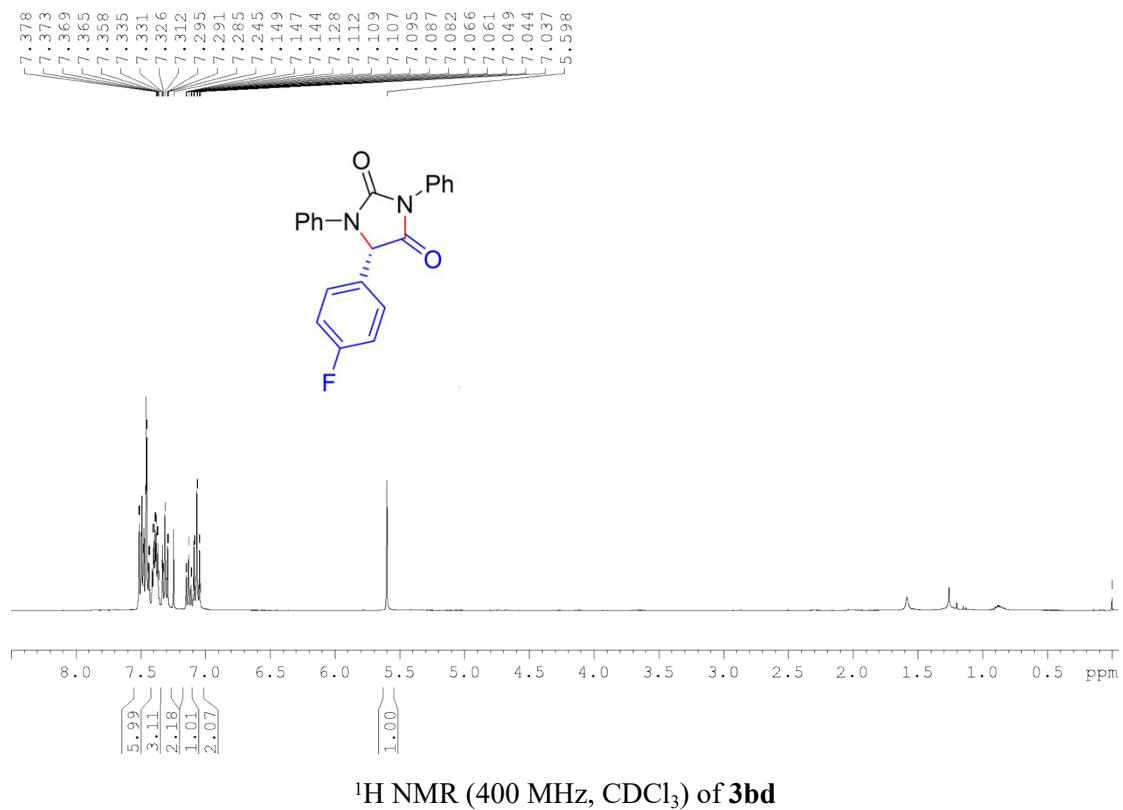



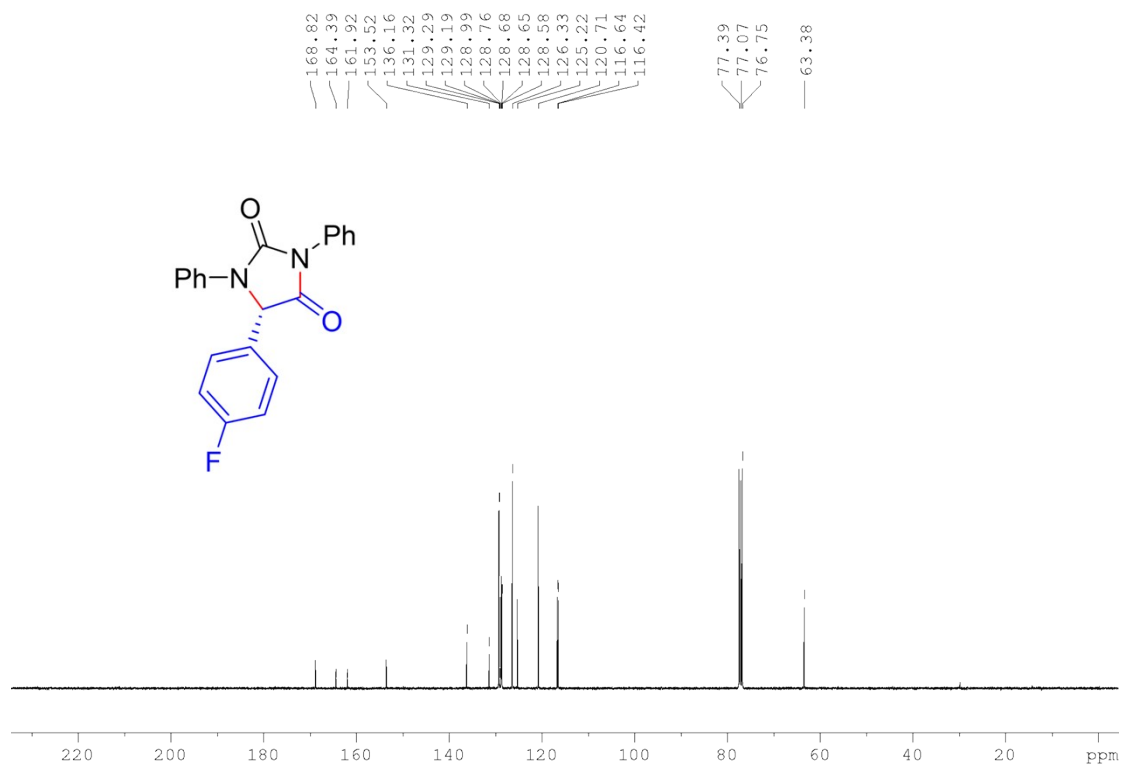

<sup>13</sup>C NMR (100 MHz, CDCl<sub>3</sub>) of **3bd**

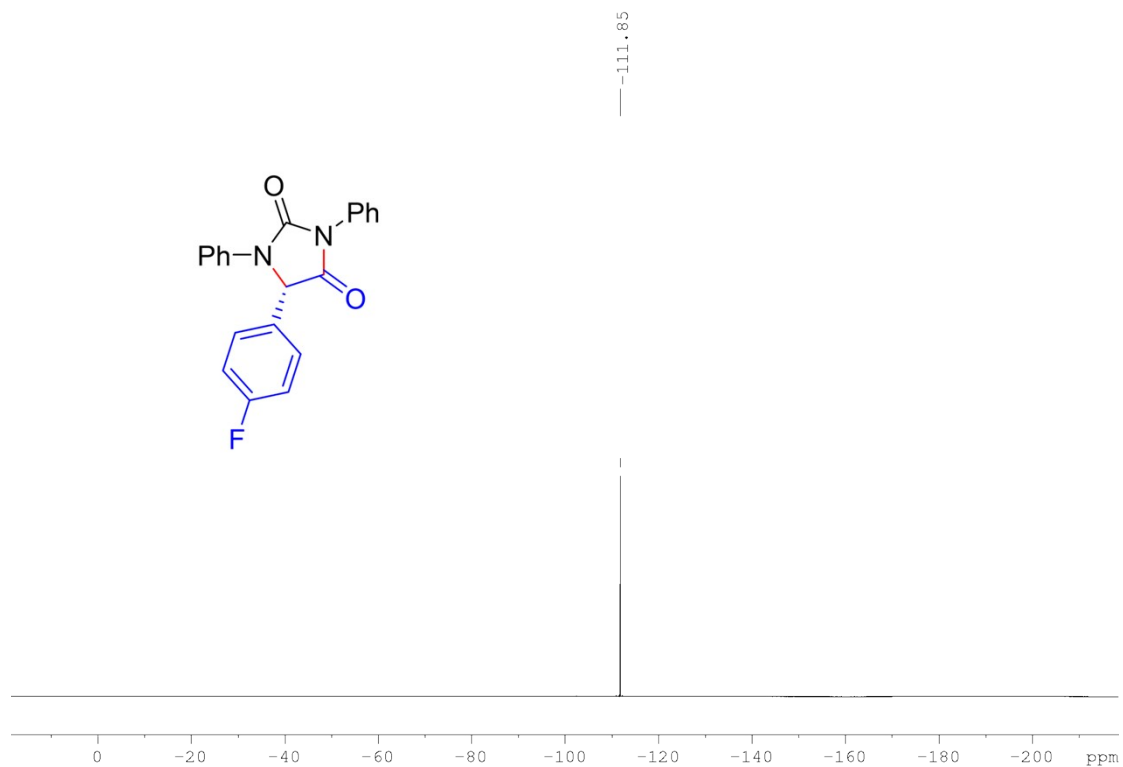

<sup>19</sup>F NMR (376 MHz, CDCl<sub>3</sub>) of **3bd**

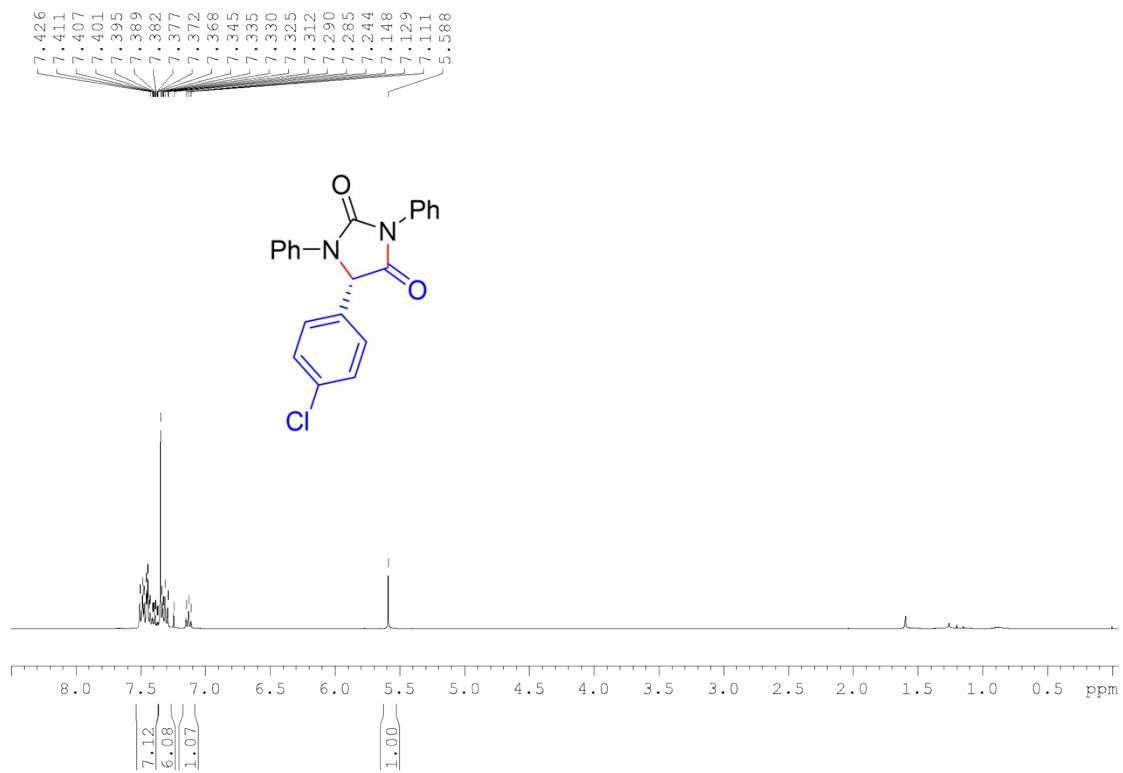

<sup>1</sup>H NMR (400 MHz, CDCl<sub>3</sub>) of **3be**

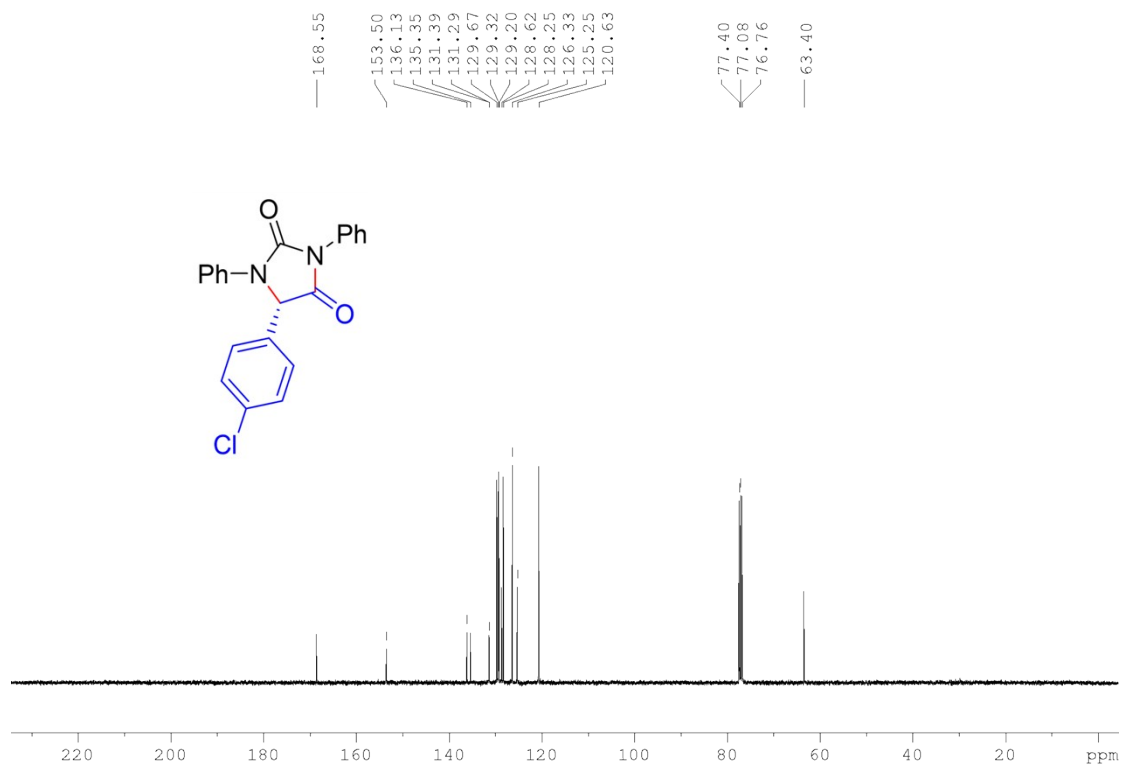

<sup>13</sup>C NMR (100 MHz, CDCl<sub>3</sub>) of **3be**

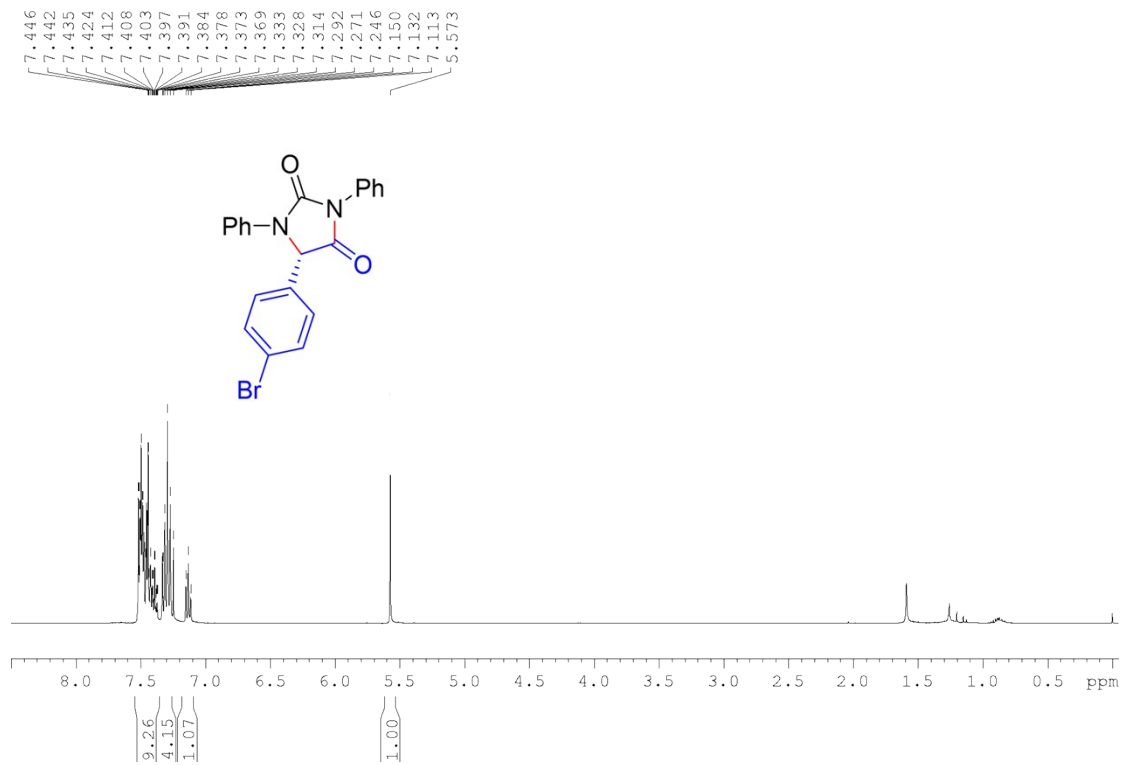

<sup>1</sup>H NMR (400 MHz, CDCl<sub>3</sub>) of **3bf**

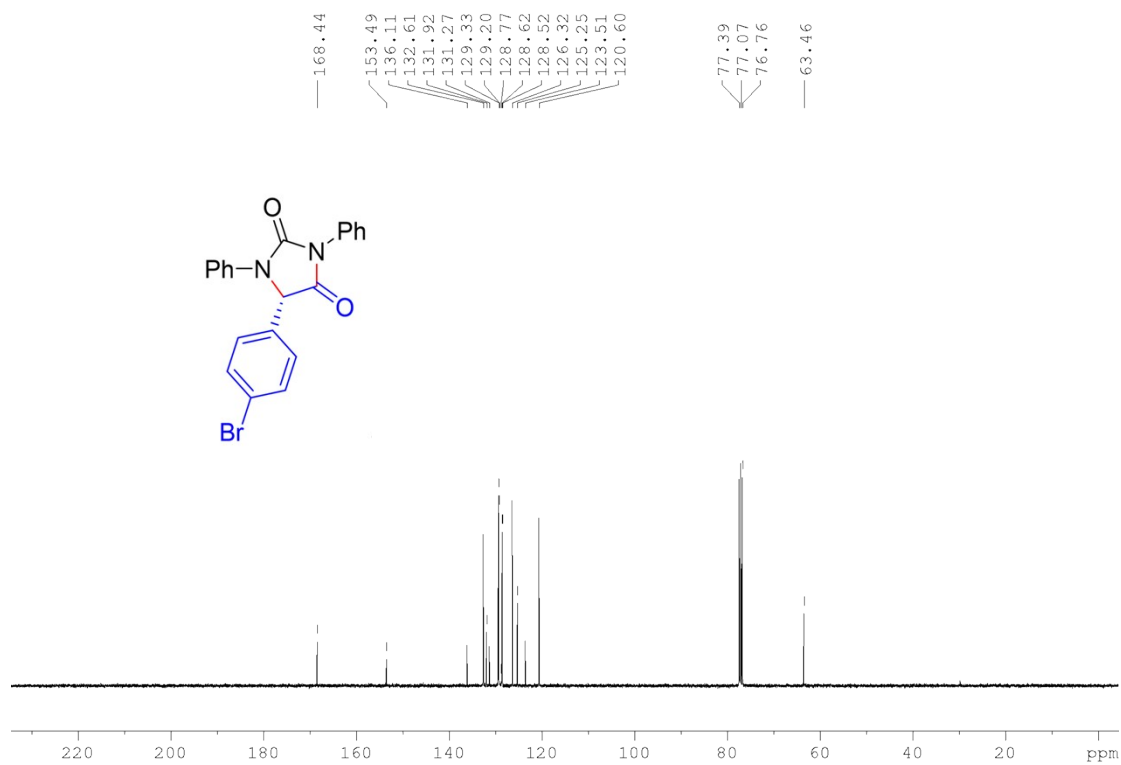

<sup>13</sup>C NMR (100 MHz, CDCl<sub>3</sub>) of **3bf**

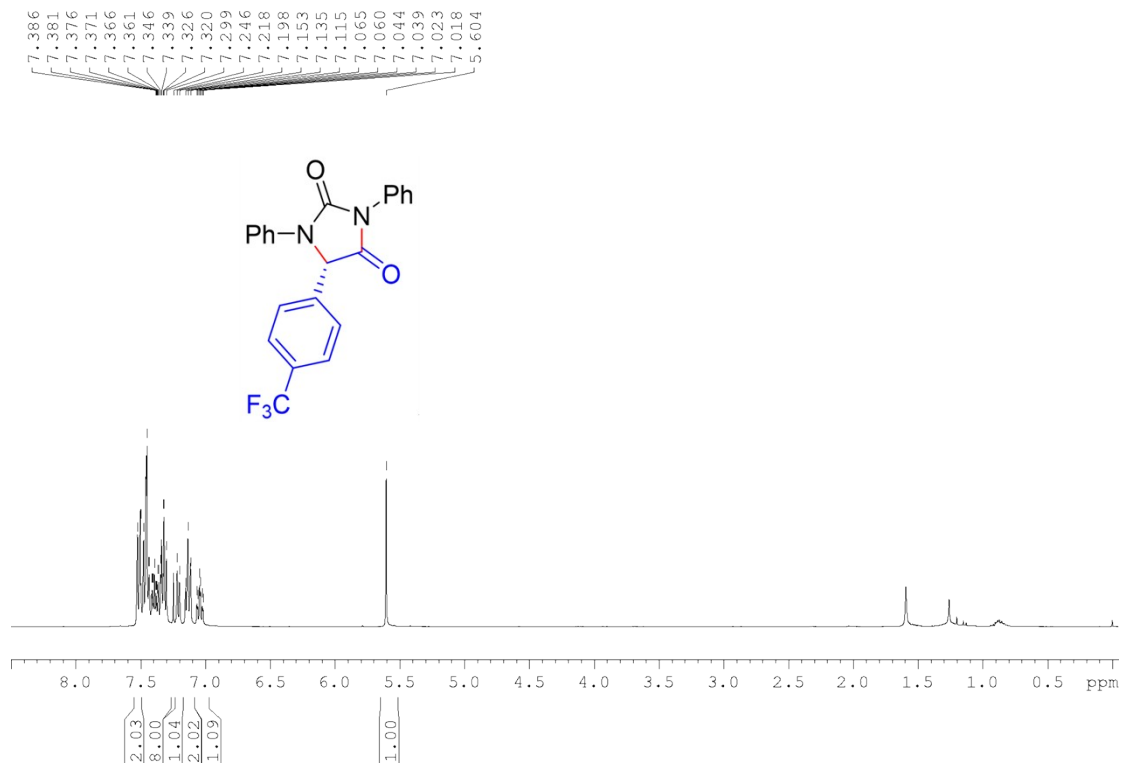

<sup>1</sup>H NMR (400 MHz, CDCl<sub>3</sub>) of **3bg**

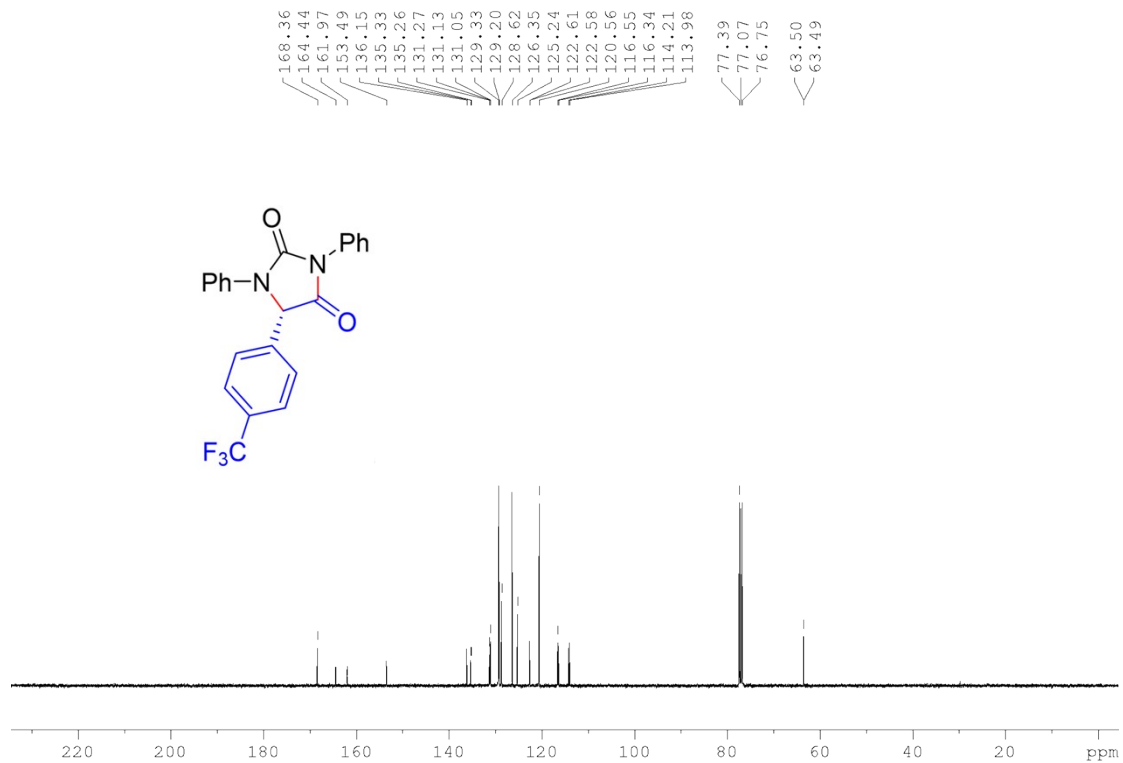

<sup>13</sup>C NMR (100 MHz, CDCl<sub>3</sub>) of **3bg**

--110.85

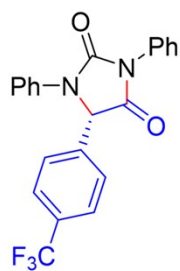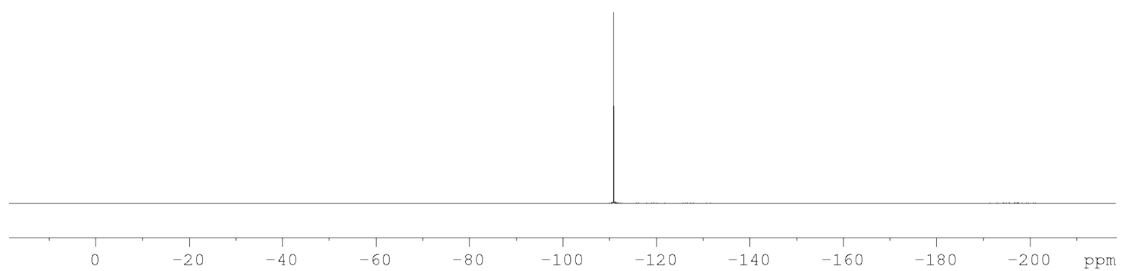

<sup>19</sup>F NMR (376 MHz, CDCl<sub>3</sub>) of **3bg**

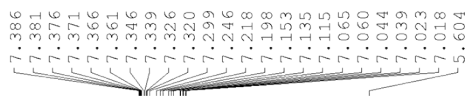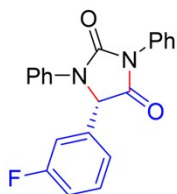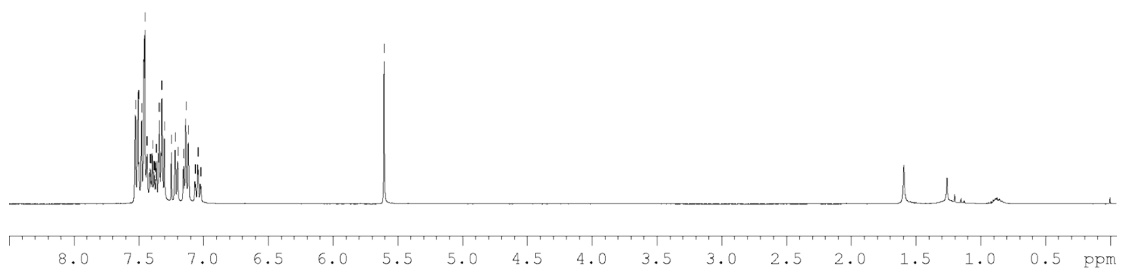

<sup>1</sup>H NMR (400 MHz, CDCl<sub>3</sub>) of **3bh**

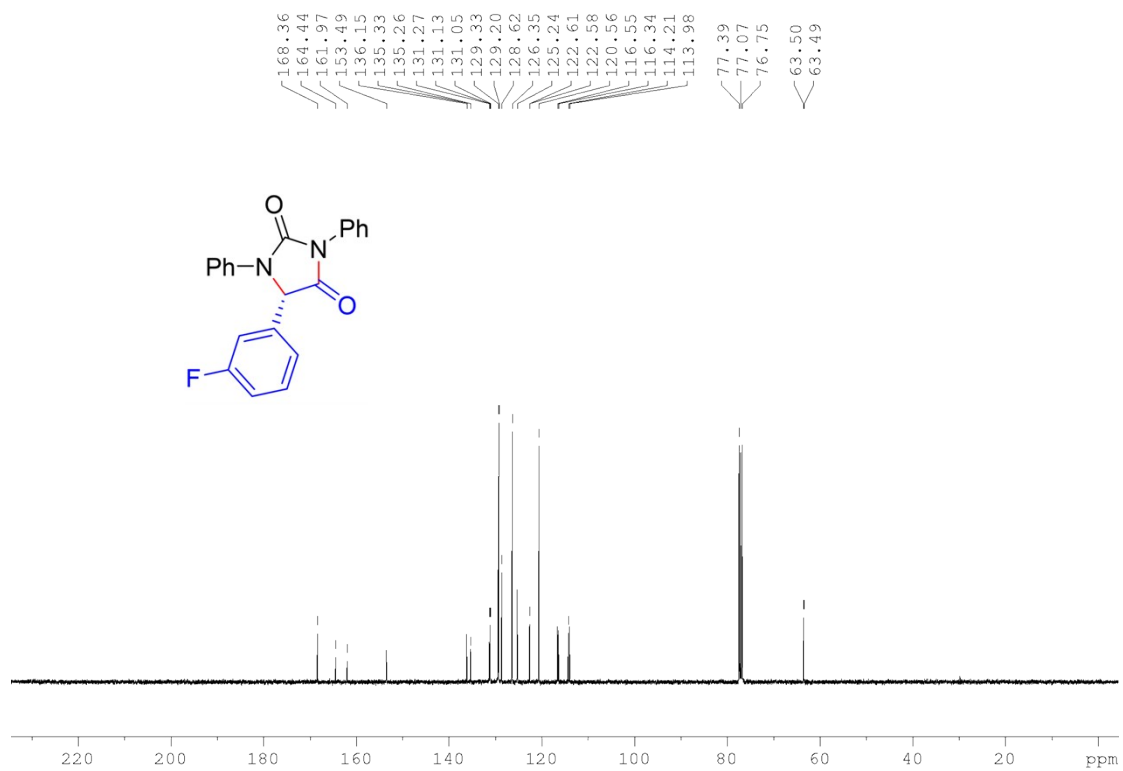

<sup>13</sup>C NMR (100 MHz, CDCl<sub>3</sub>) of **3bh**

--110.85

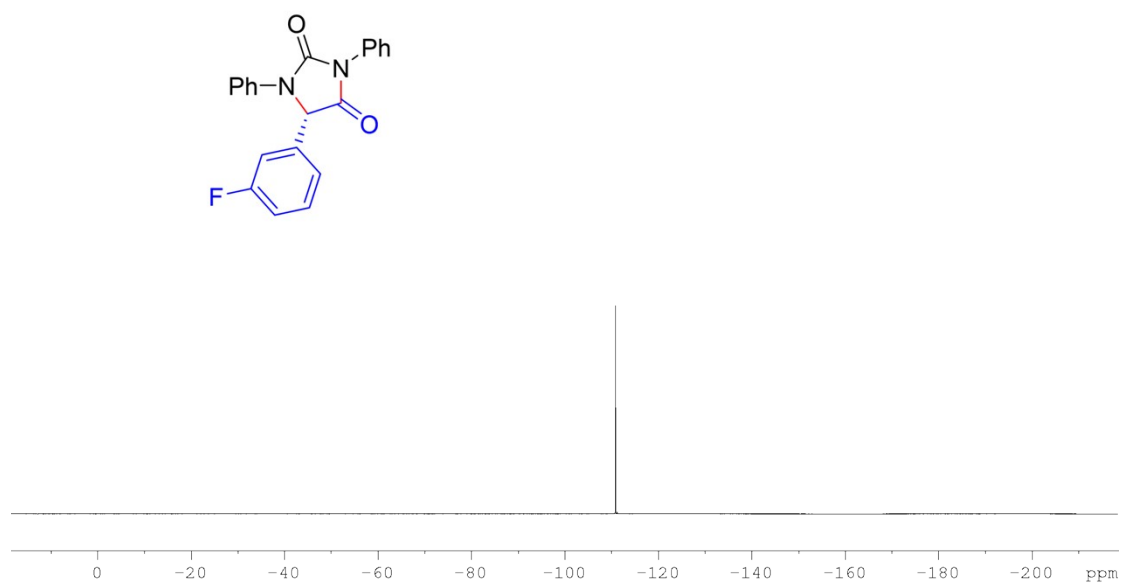

<sup>19</sup>F NMR (376 MHz, CDCl<sub>3</sub>) of **3bh**

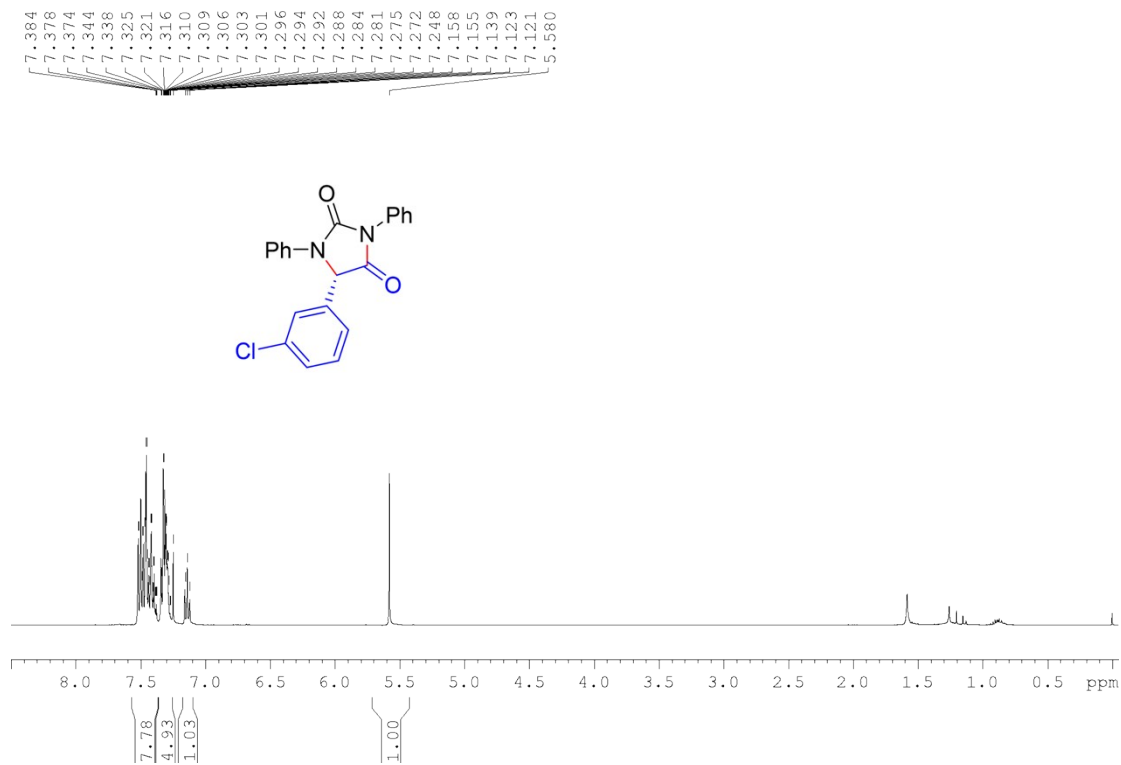

<sup>1</sup>H NMR (400 MHz, CDCl<sub>3</sub>) of **3bi**

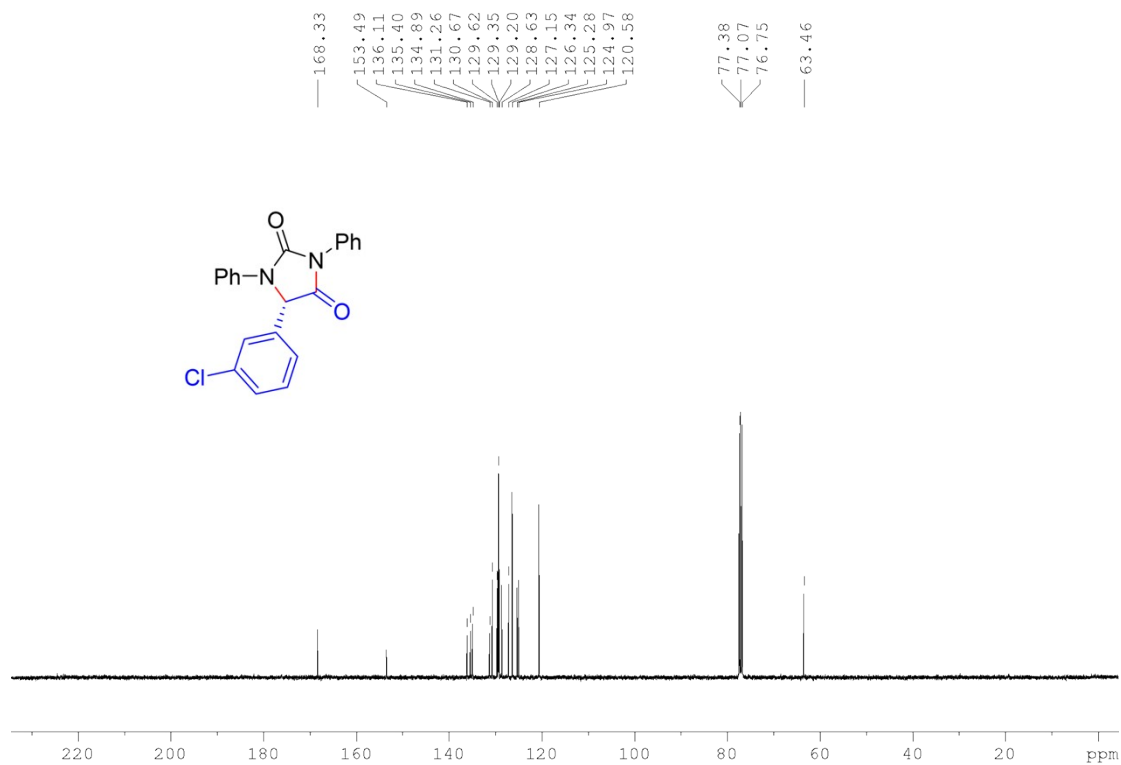

<sup>13</sup>C NMR (100 MHz, CDCl<sub>3</sub>) of **3bi**

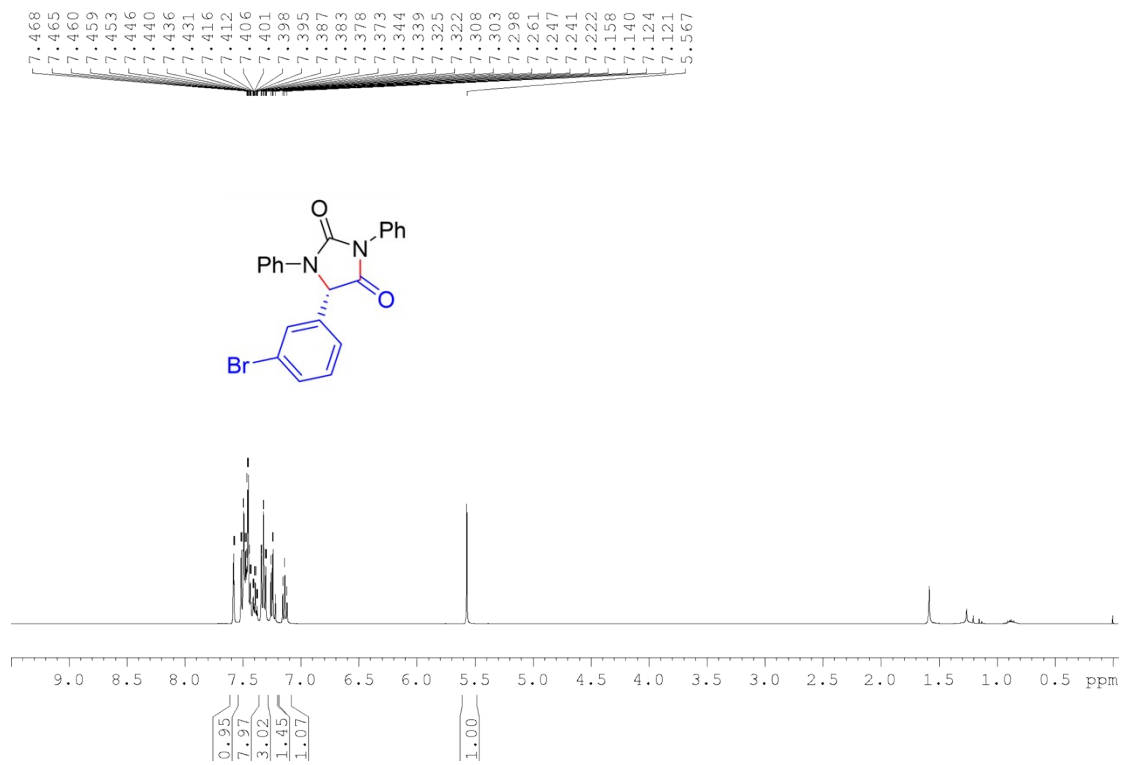

<sup>1</sup>H NMR (400 MHz, CDCl<sub>3</sub>) of **3bj**

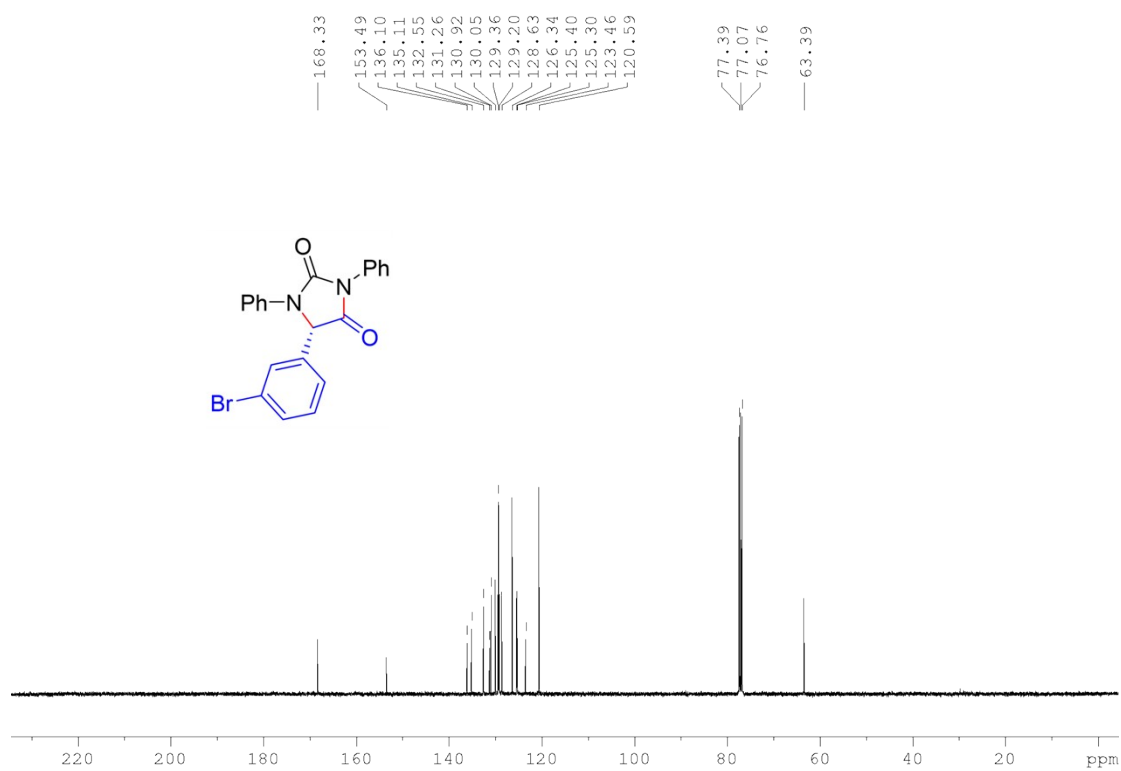

<sup>13</sup>C NMR (100 MHz, CDCl<sub>3</sub>) of **3bj**



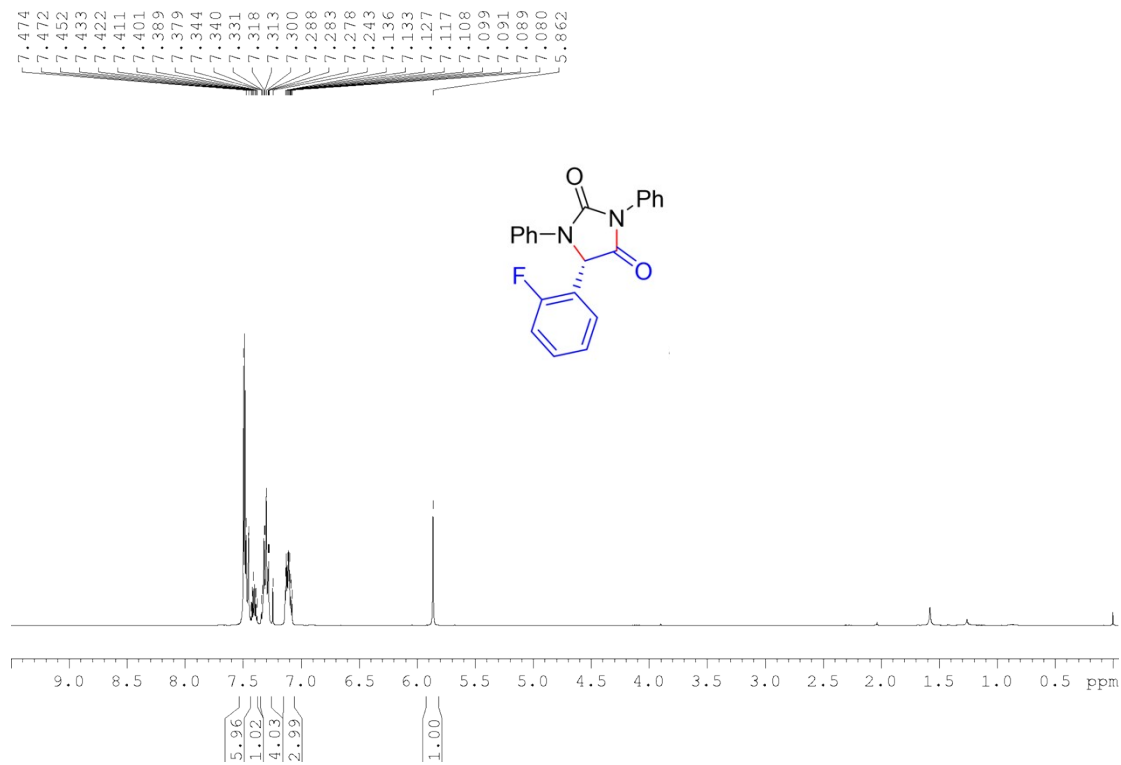

<sup>1</sup>H NMR (400 MHz, CDCl<sub>3</sub>) of 3bk

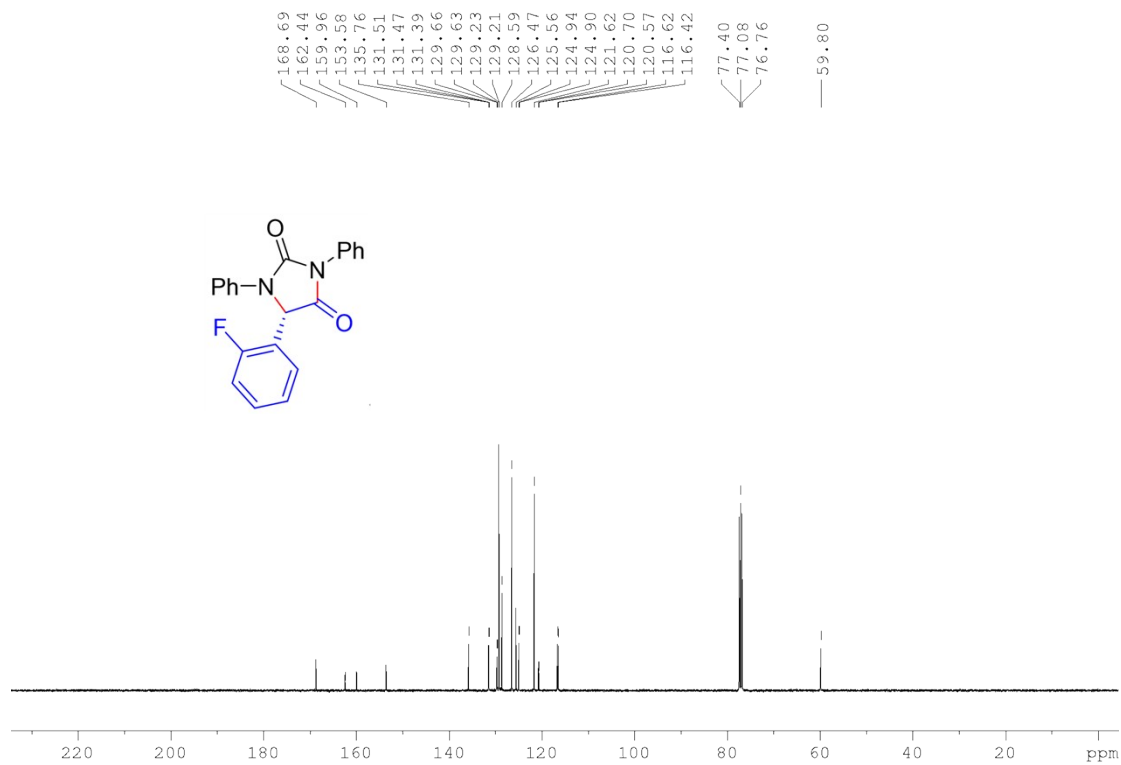

<sup>13</sup>C NMR (100 MHz, CDCl<sub>3</sub>) of 3bk

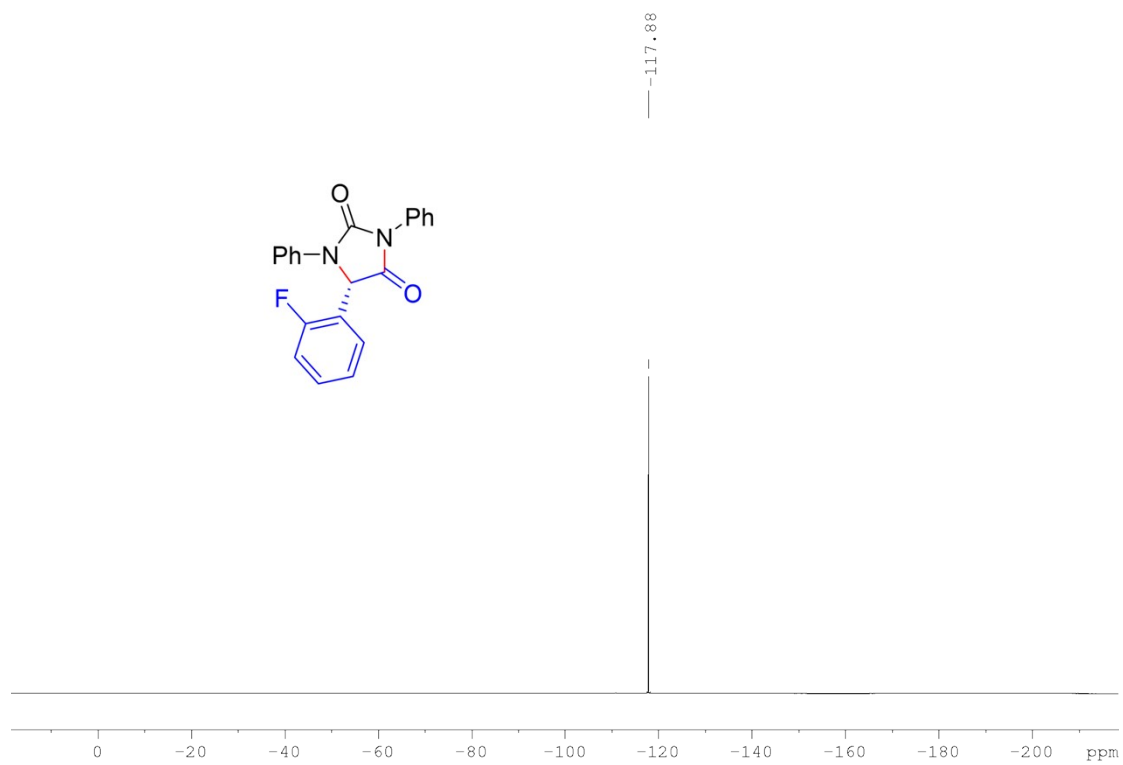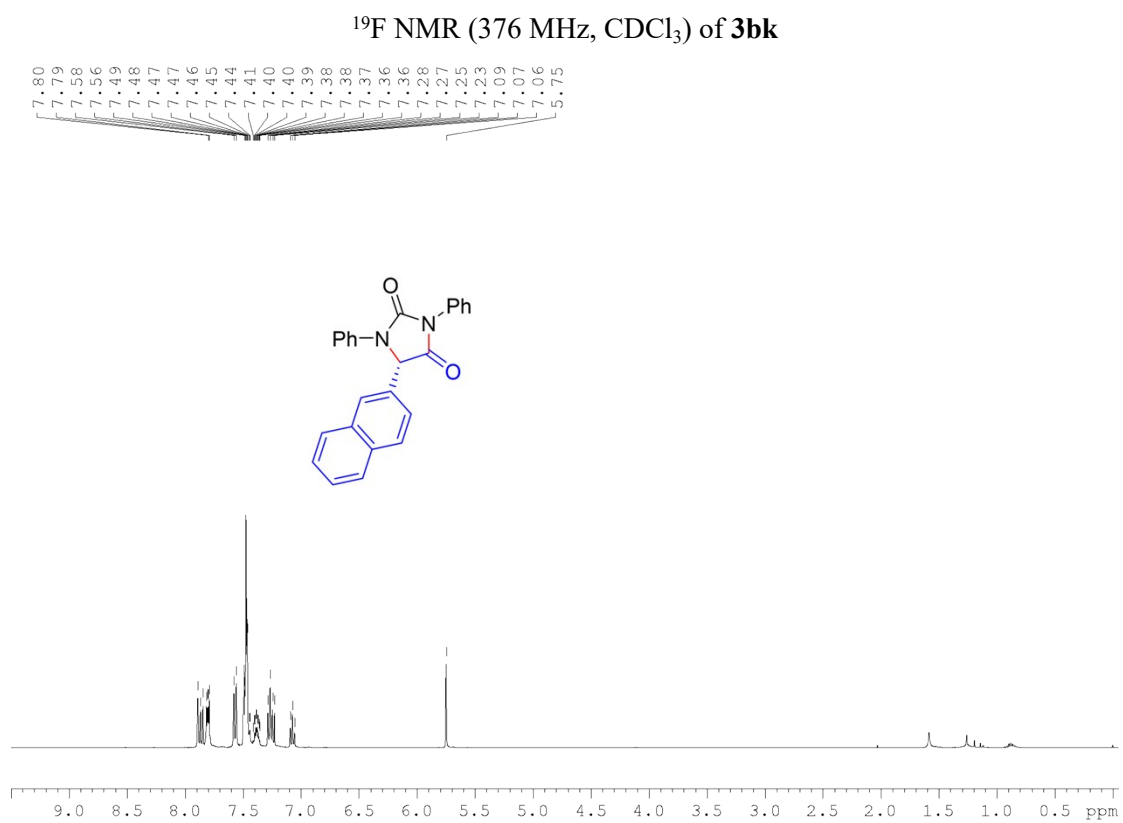

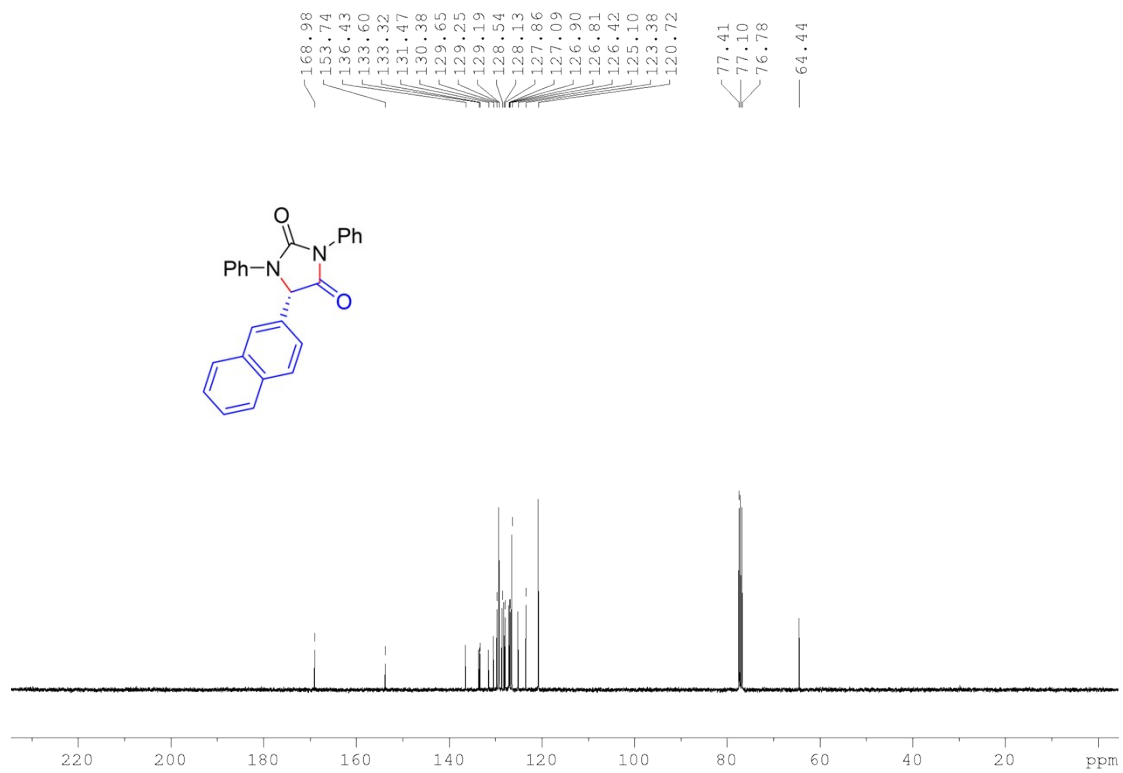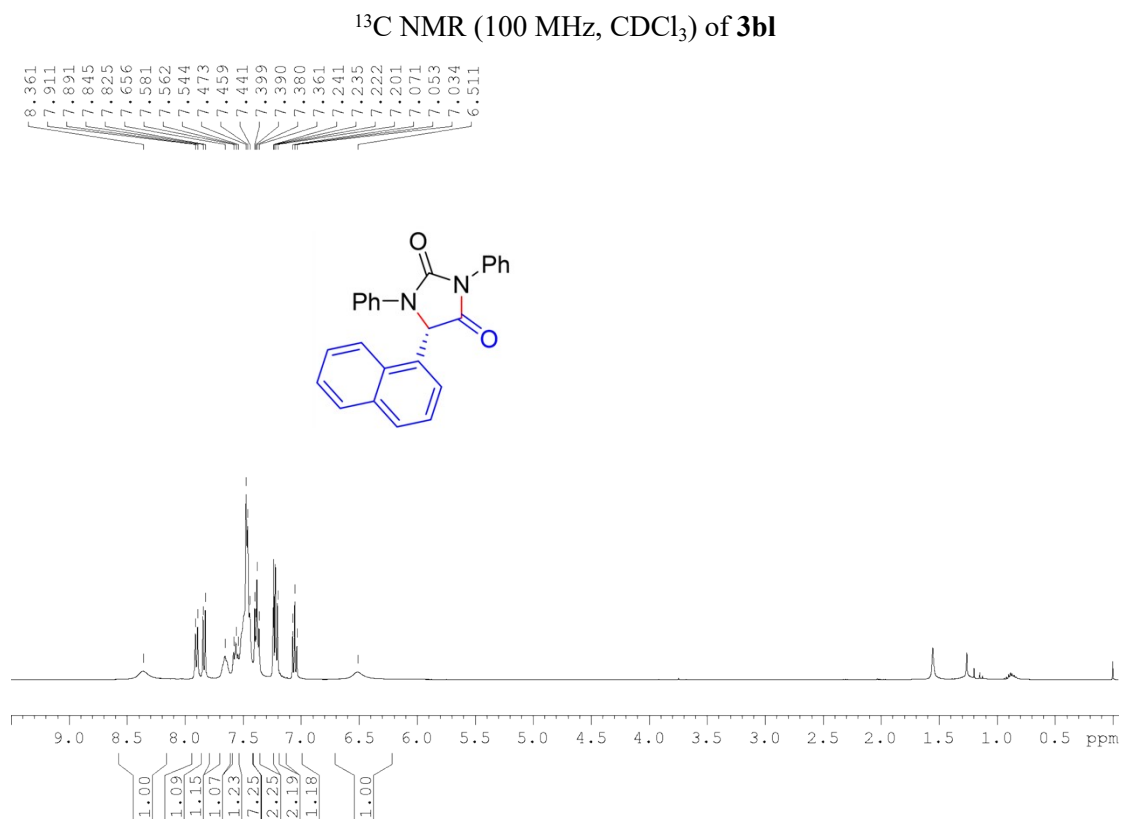

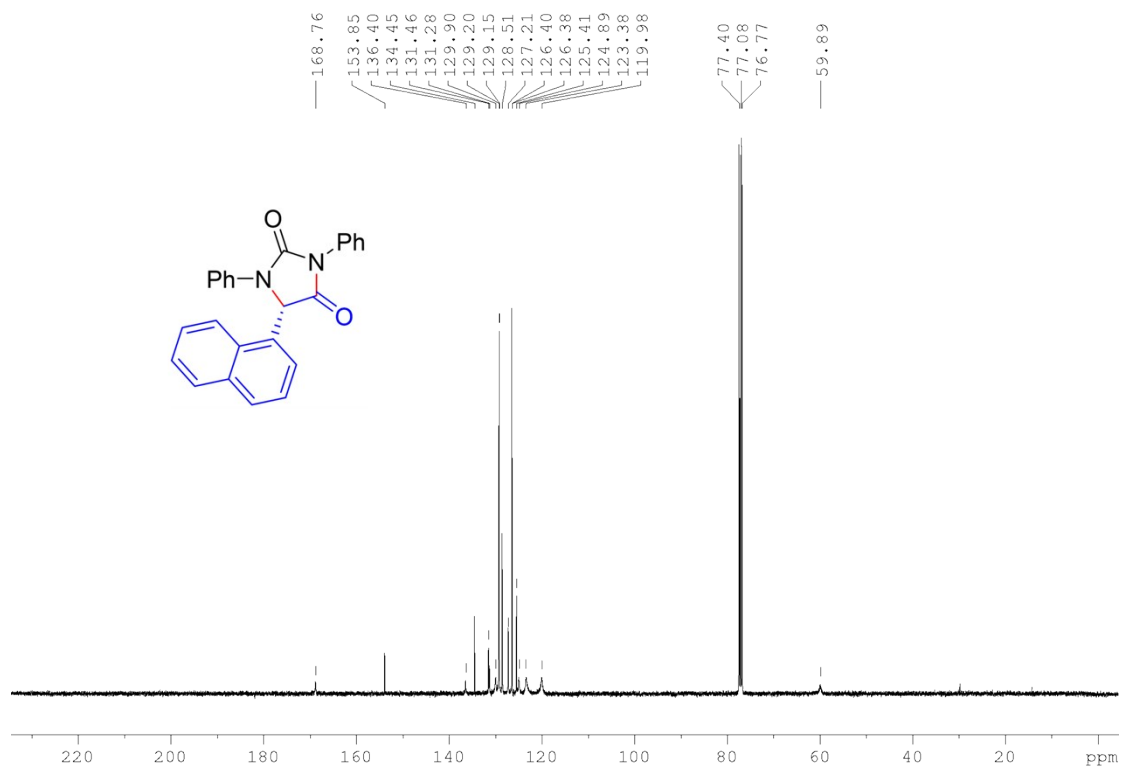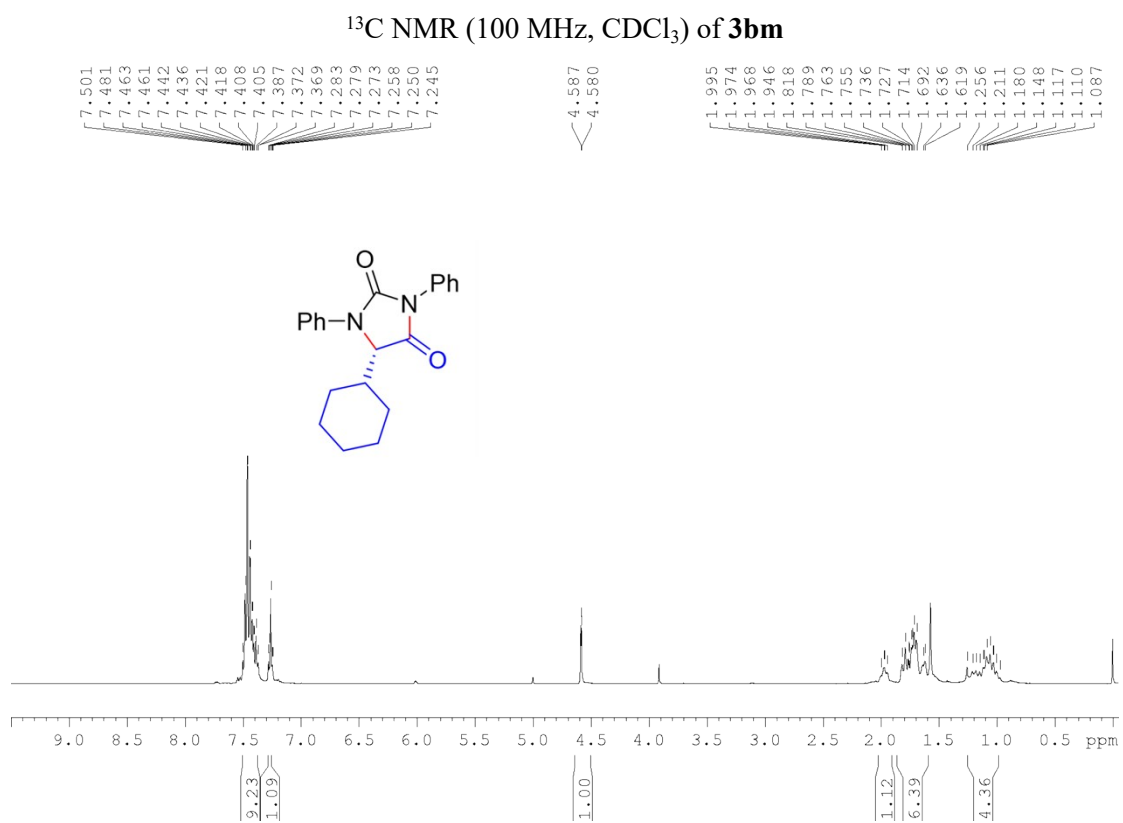

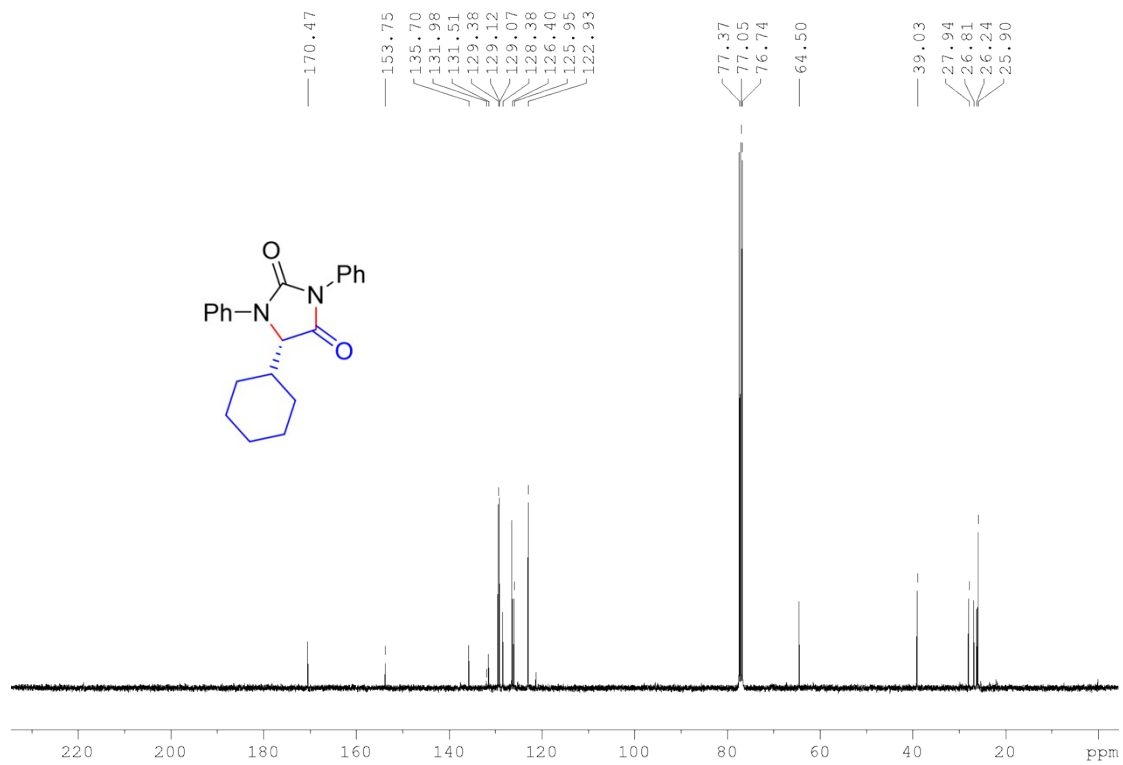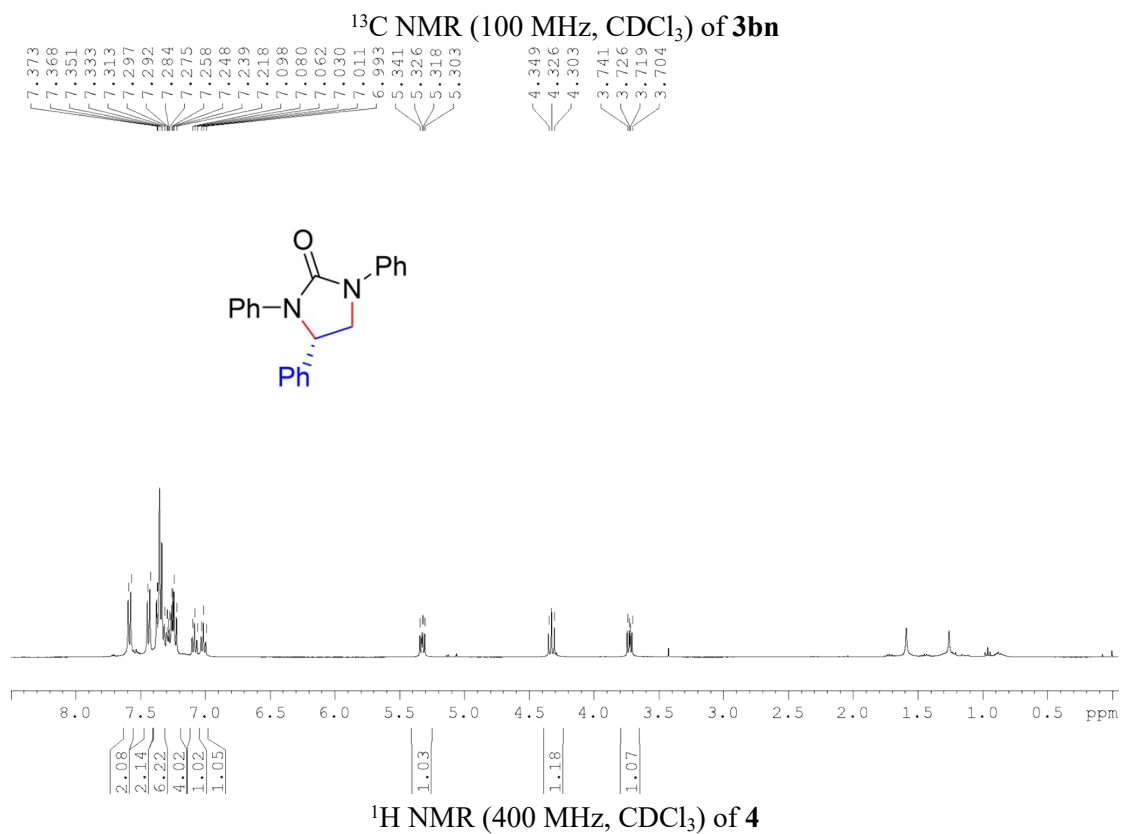

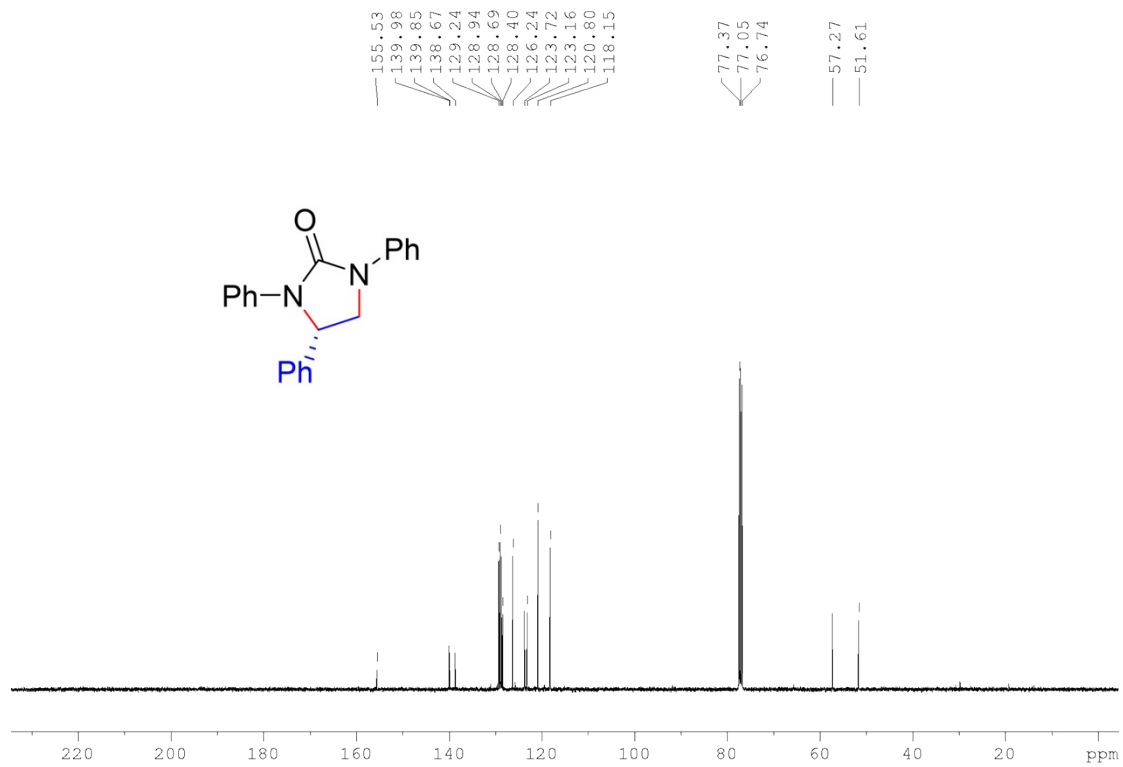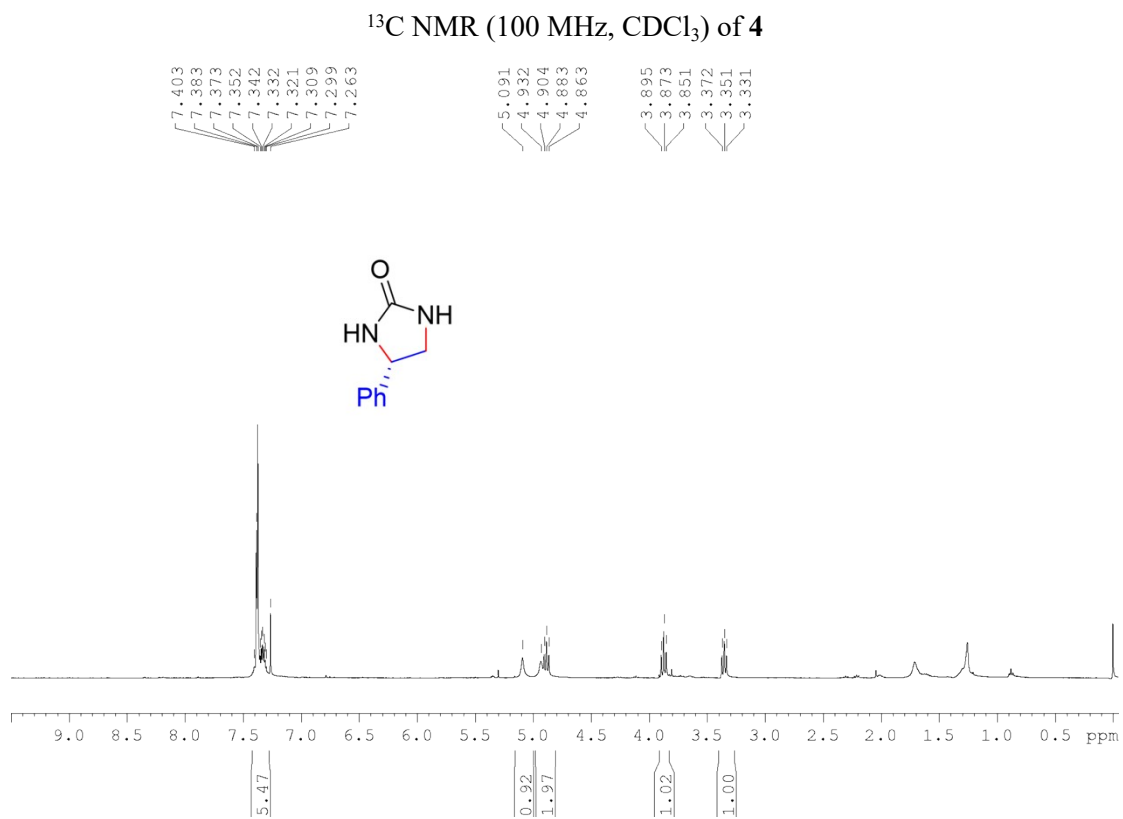

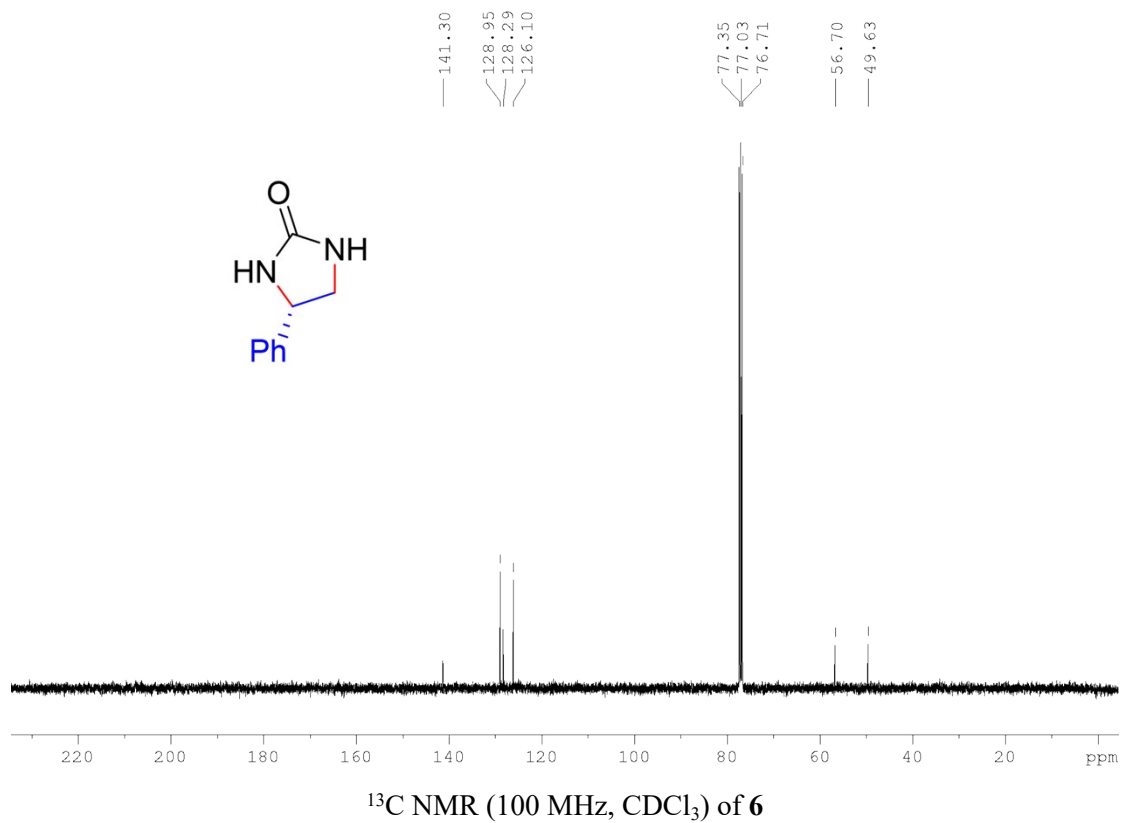

## VIII. Copies of HPLC Spectra

### HPLC spectra of 3ba

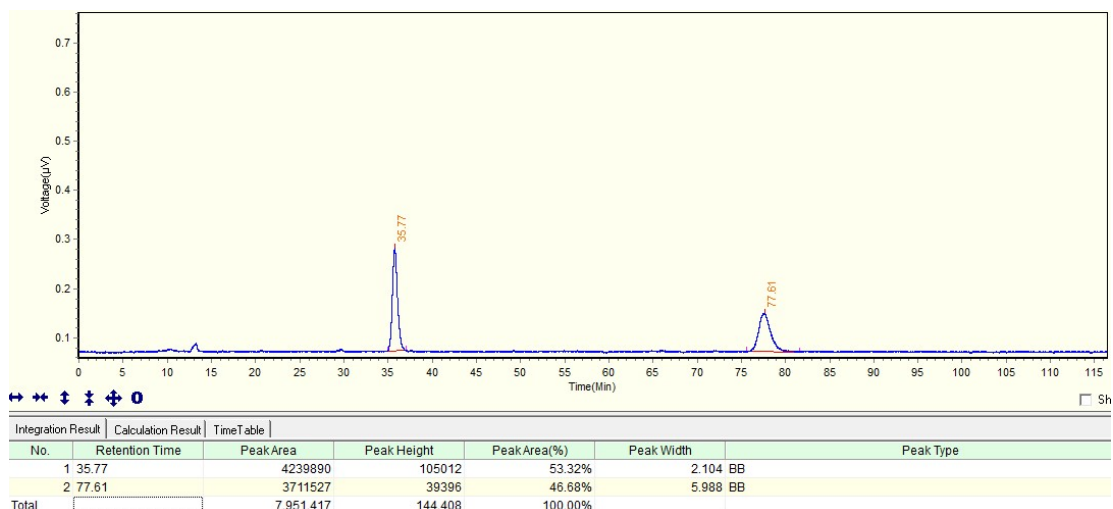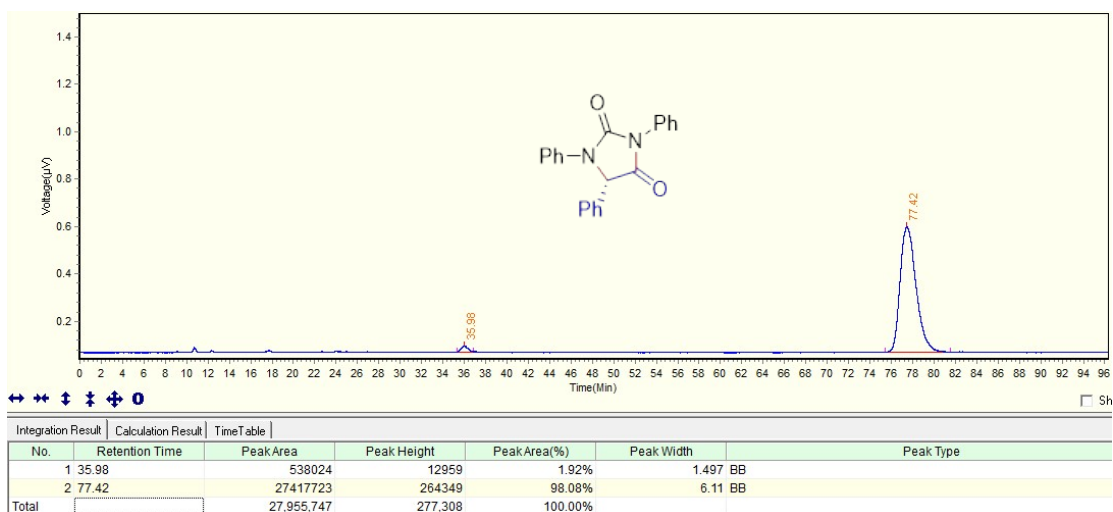

### HPLC spectra of 3ea

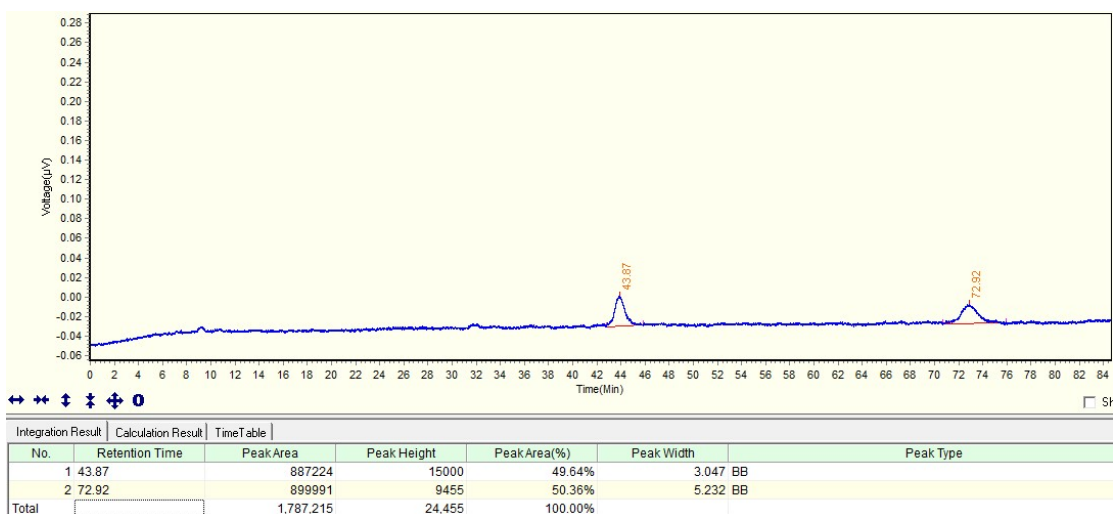



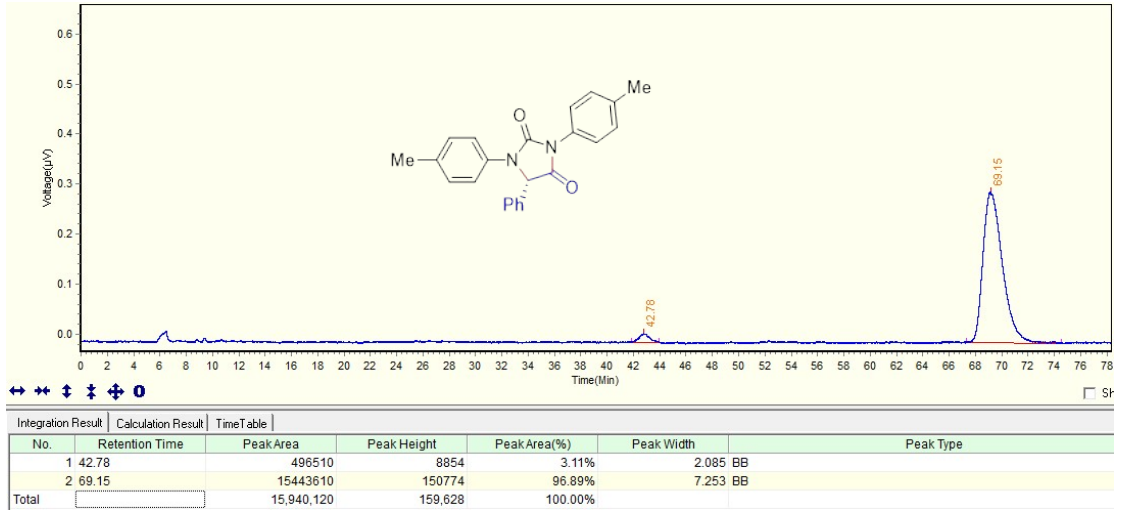

### HPLC spectra of 3fa

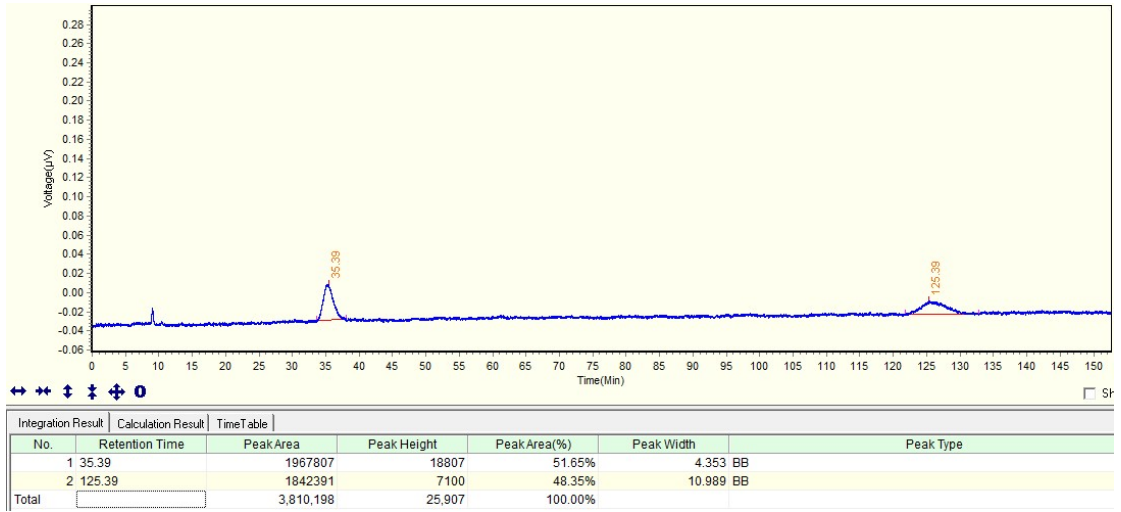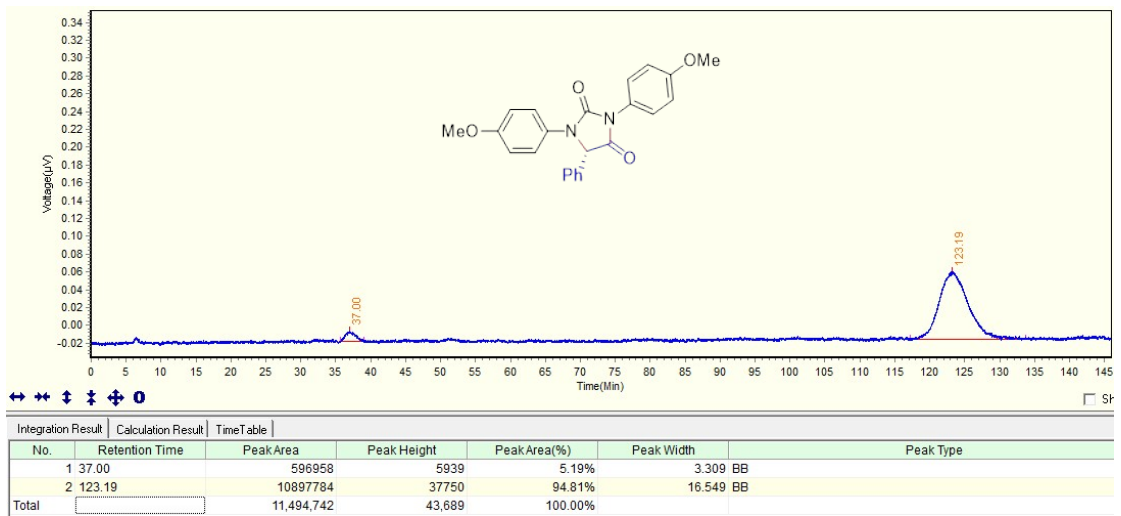

## HPLC spectra of 3ga

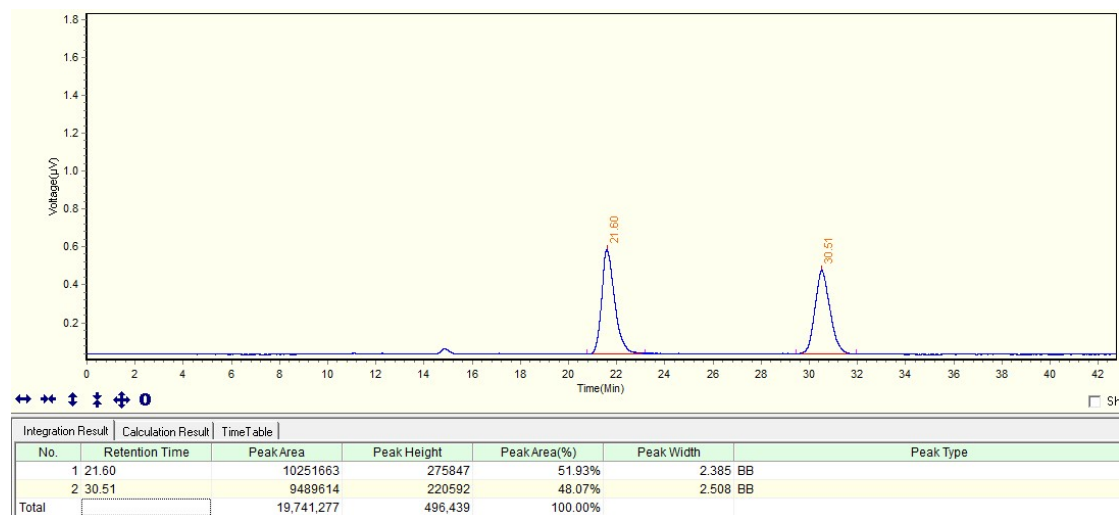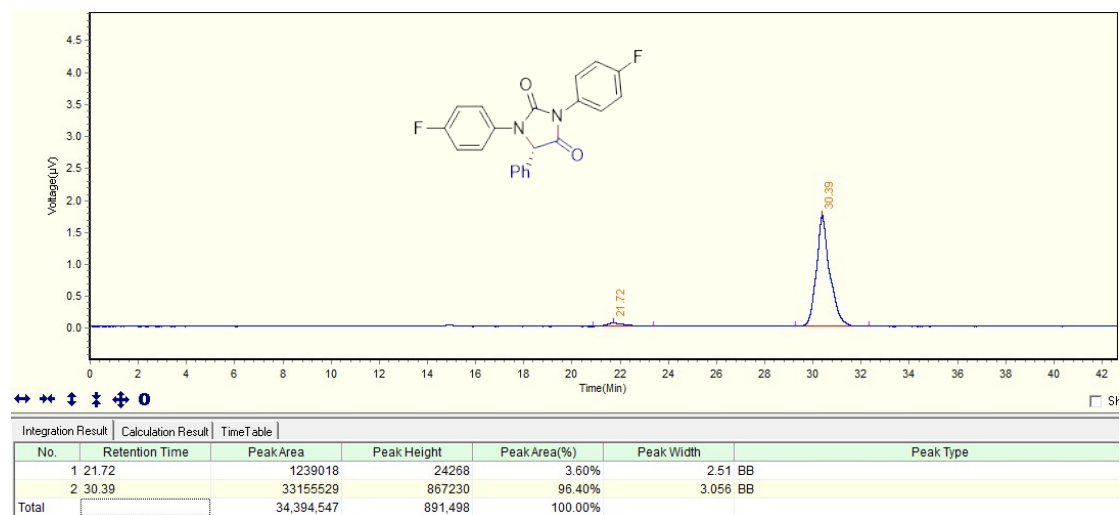

## HPLC spectra of 3ha

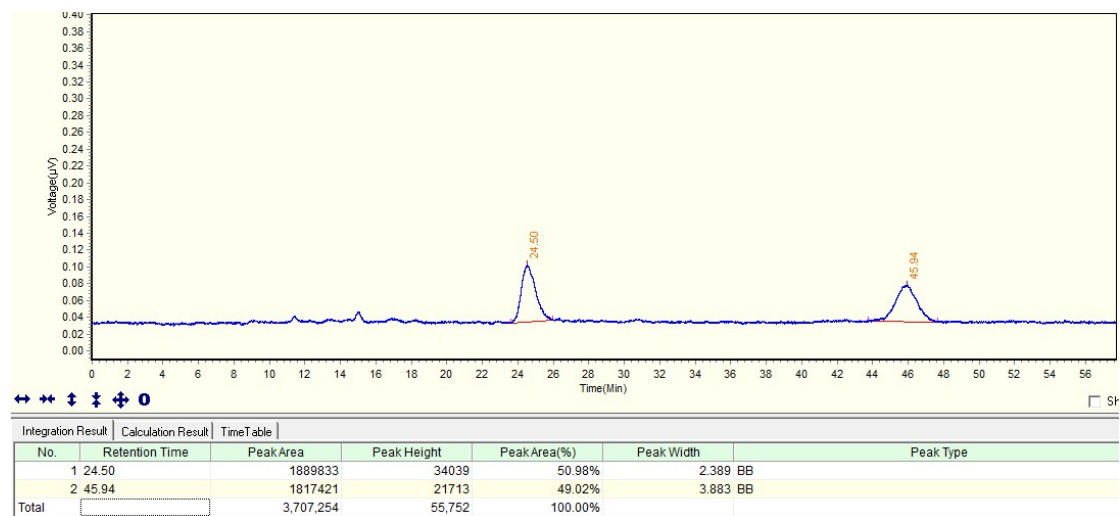

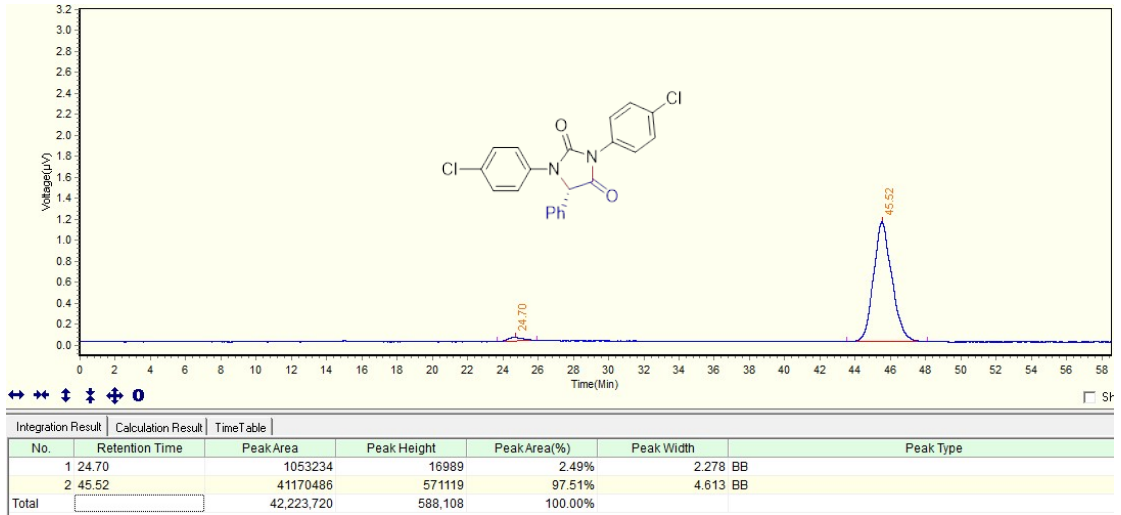

HPLC spectra of **3ia**

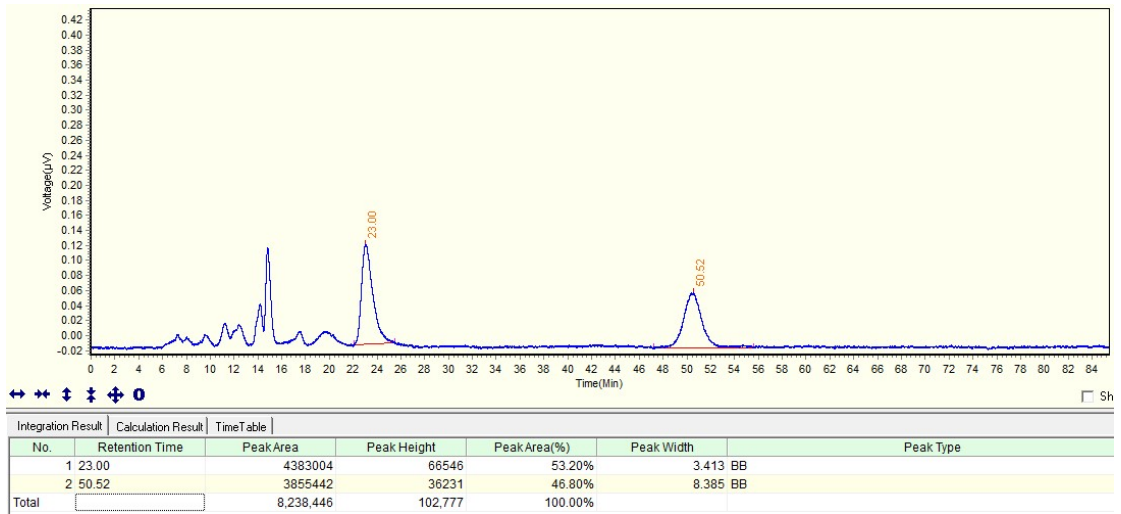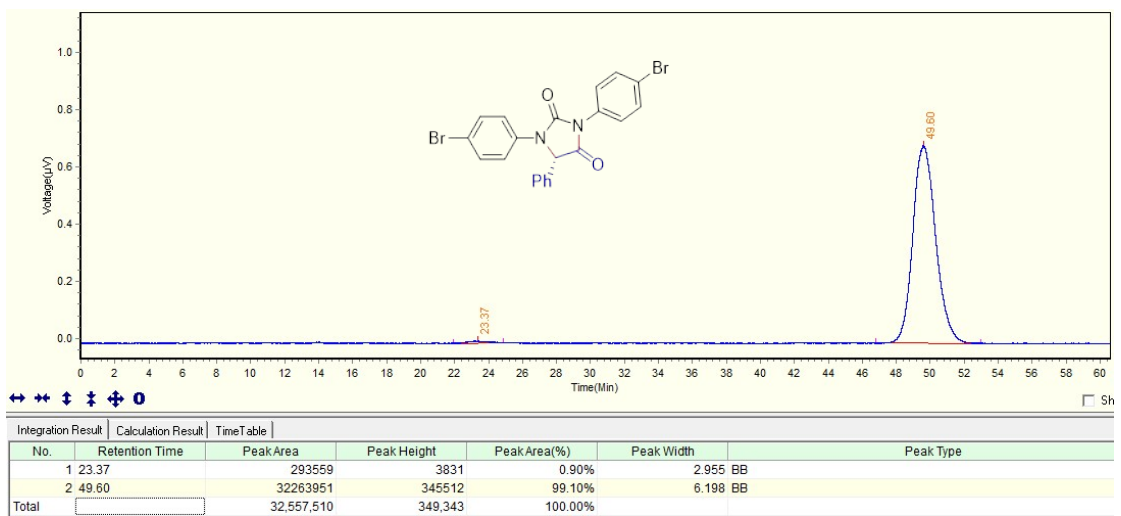

## HPLC spectra of 3ja

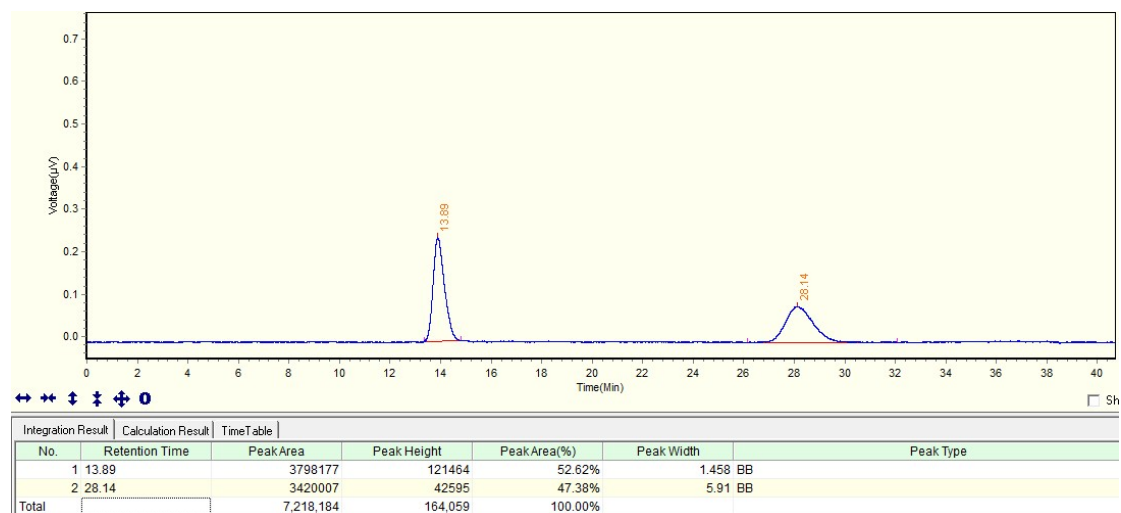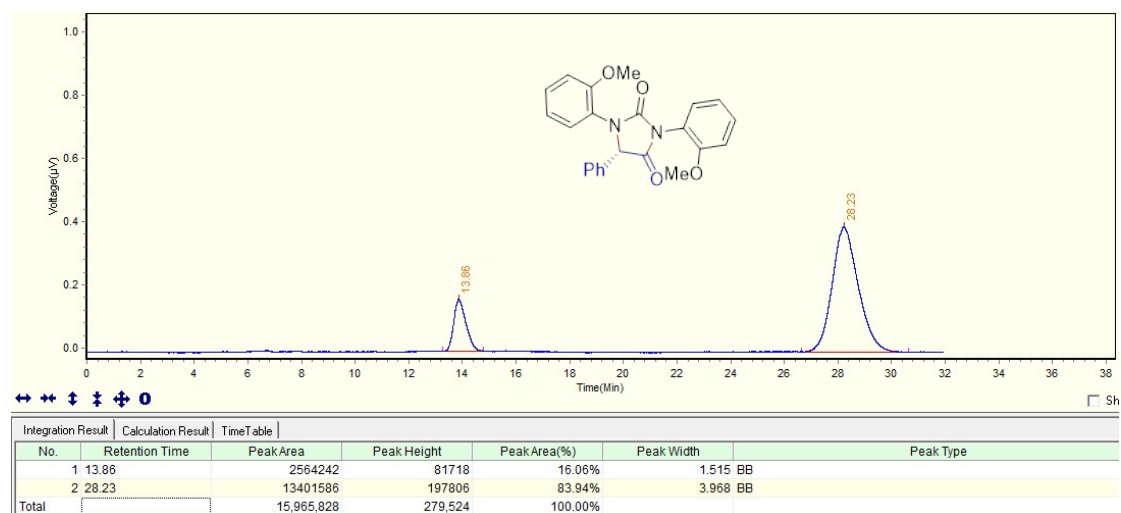

## HPLC spectra of 3ka

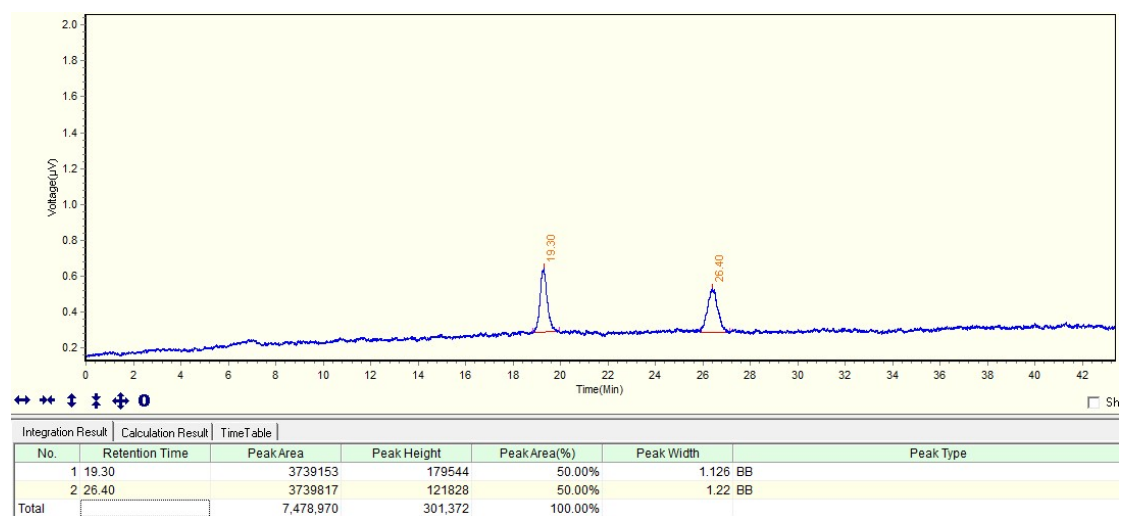

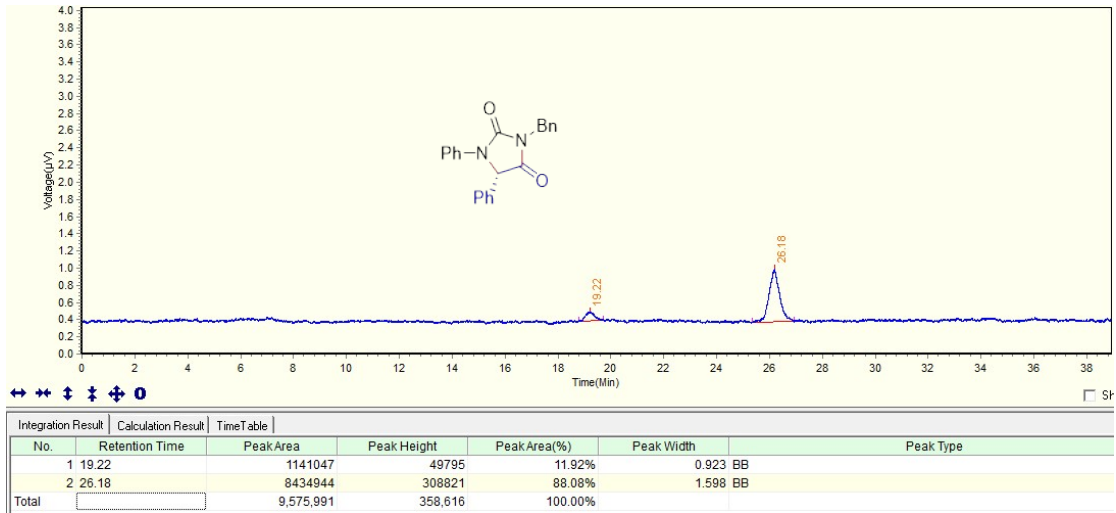

### HPLC spectra of 3bb

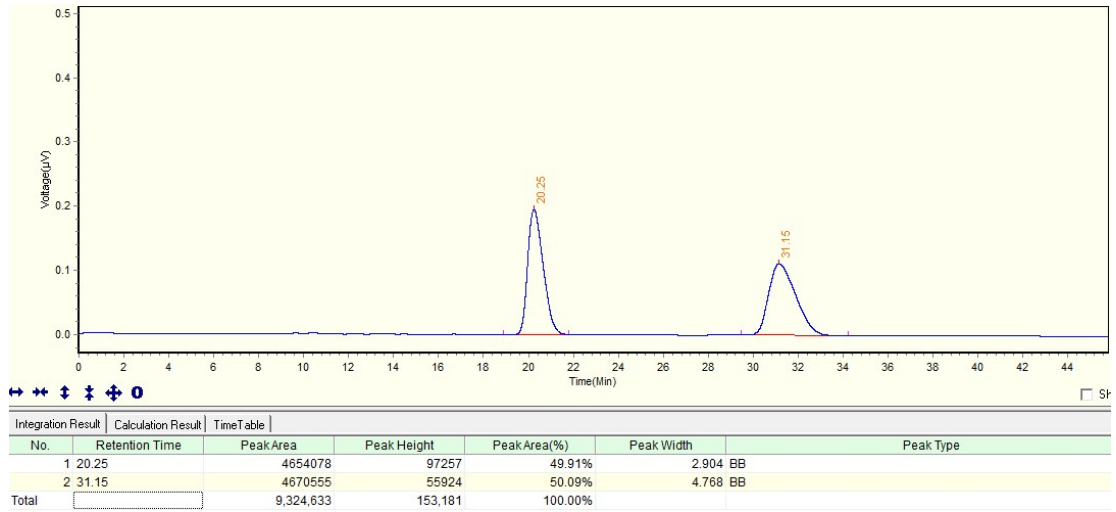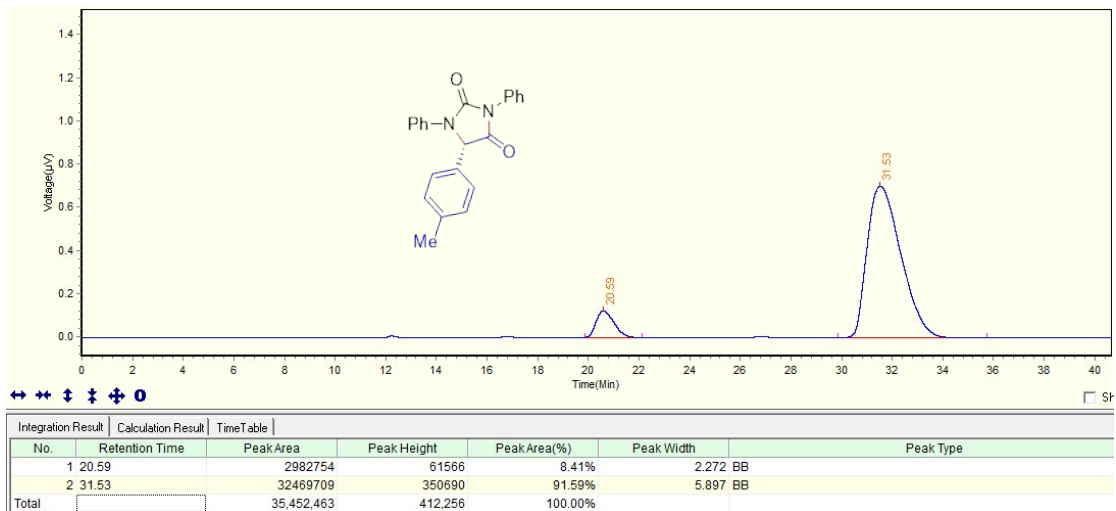

## HPLC spectra of 3bc

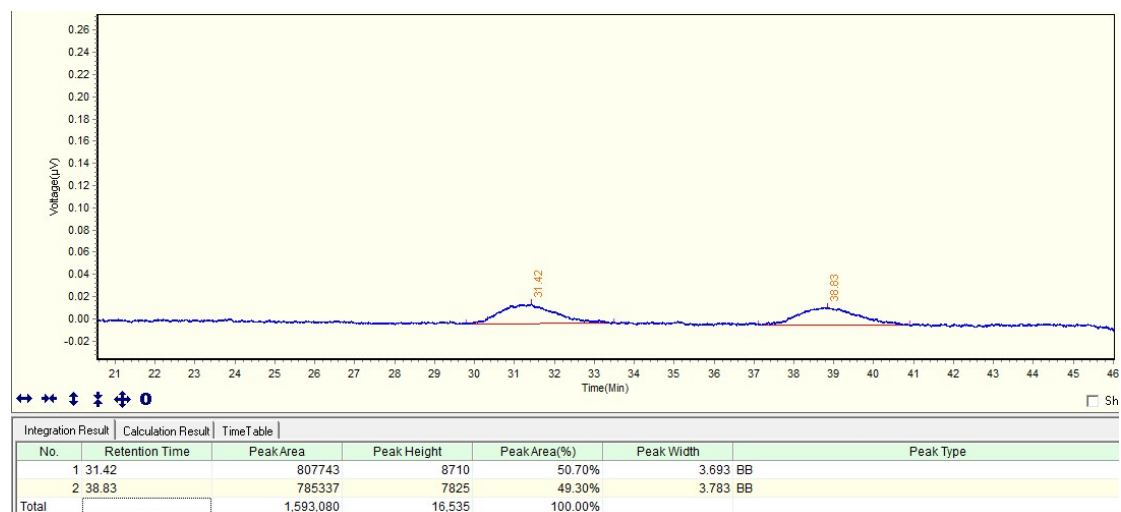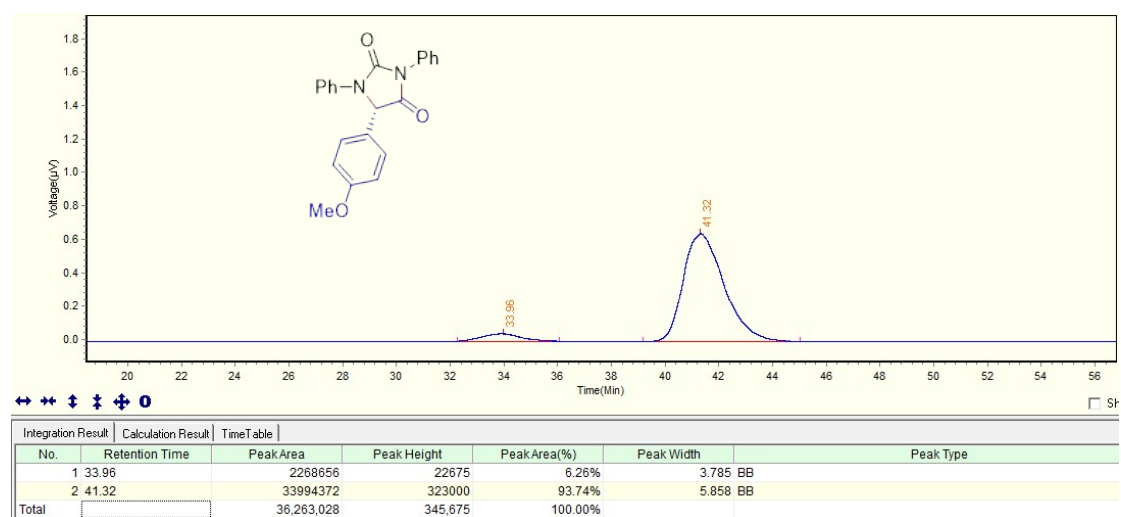

## HPLC spectra of 3bd

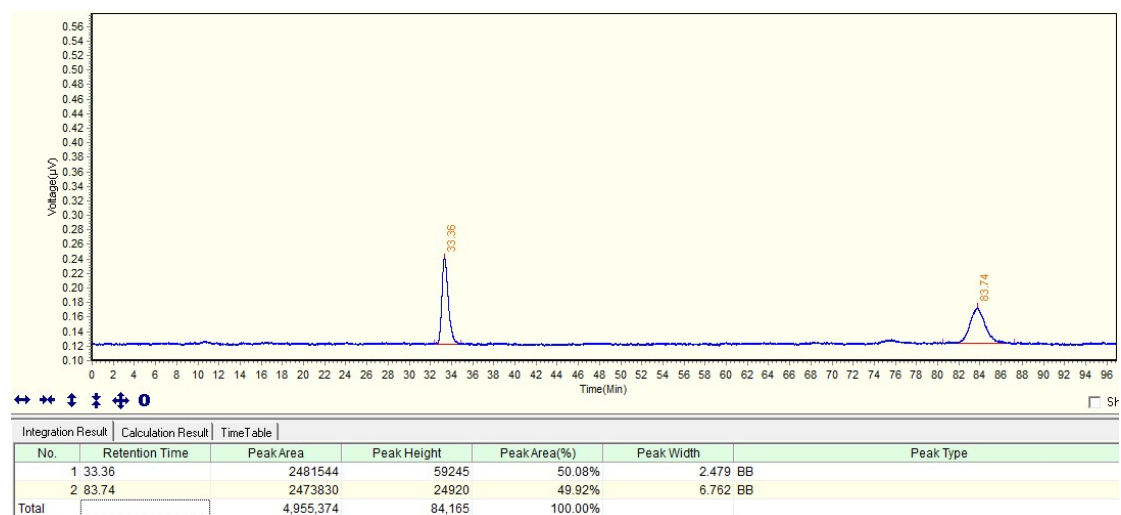

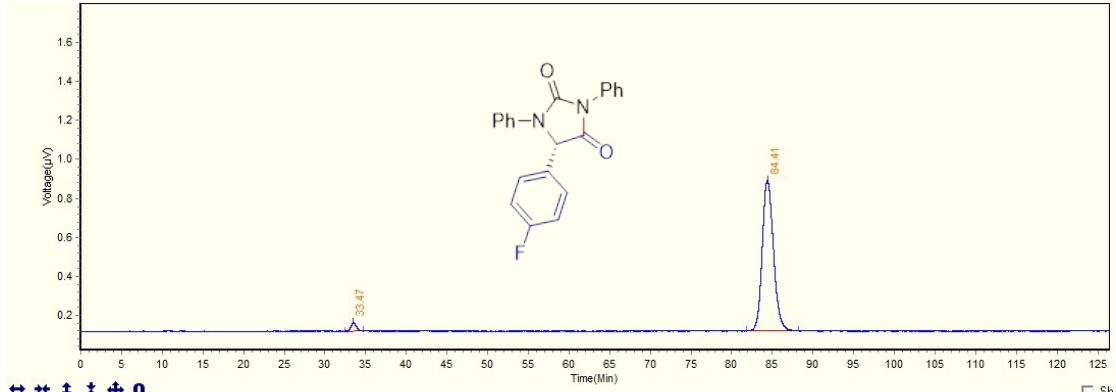

| No.   | Retention Time | PeakArea   | Peak Height | PeakArea(%) | Peak Width | Peak Type |
|-------|----------------|------------|-------------|-------------|------------|-----------|
| 1     | 33.47          | 1002349    | 22185       | 2.63%       | 2.245 BB   |           |
| 2     | 84.41          | 37072879   | 385801      | 97.37%      | 6.369 BB   |           |
| Total |                | 38,075,228 | 407,986     | 100.00%     |            |           |

### HPLC spectra of 3be

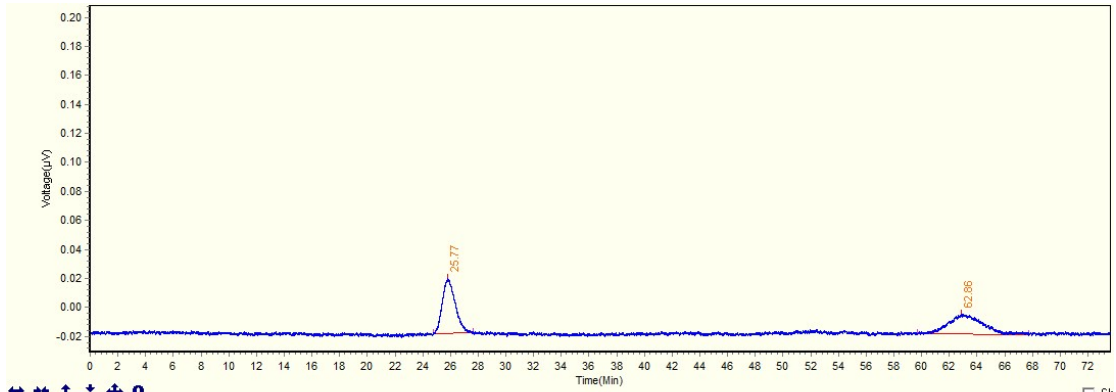

| No.   | Retention Time | PeakArea  | Peak Height | PeakArea(%) | Peak Width | Peak Type |
|-------|----------------|-----------|-------------|-------------|------------|-----------|
| 1     | 25.77          | 1223979   | 18944       | 50.65%      | 2.898 BB   |           |
| 2     | 62.86          | 1192334   | 6896        | 49.35%      | 8.053 BB   |           |
| Total |                | 2,416,313 | 25,840      | 100.00%     |            |           |

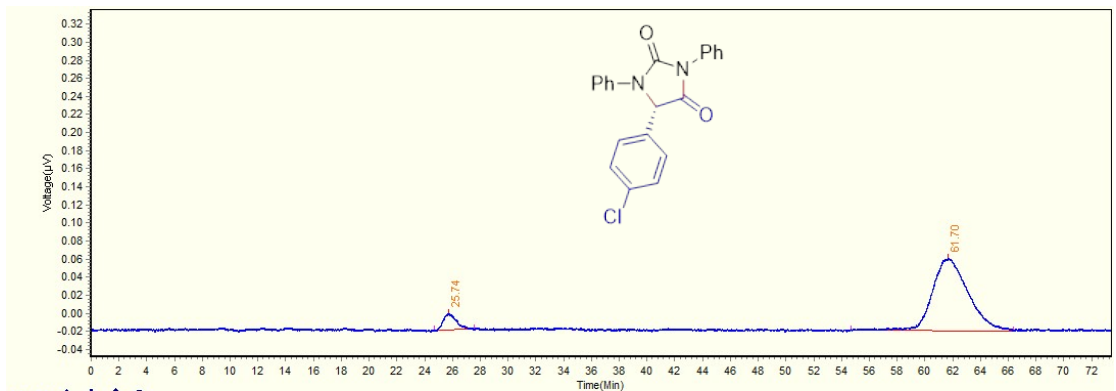

| No.   | Retention Time | PeakArea  | Peak Height | PeakArea(%) | Peak Width | Peak Type |
|-------|----------------|-----------|-------------|-------------|------------|-----------|
| 1     | 25.74          | 565716    | 9016        | 7.44%       | 2.89 BB    |           |
| 2     | 61.70          | 7040405   | 39649       | 92.56%      | 11.684 BB  |           |
| Total |                | 7,606,121 | 48,665      | 100.00%     |            |           |

## HPLC spectra of 3bf

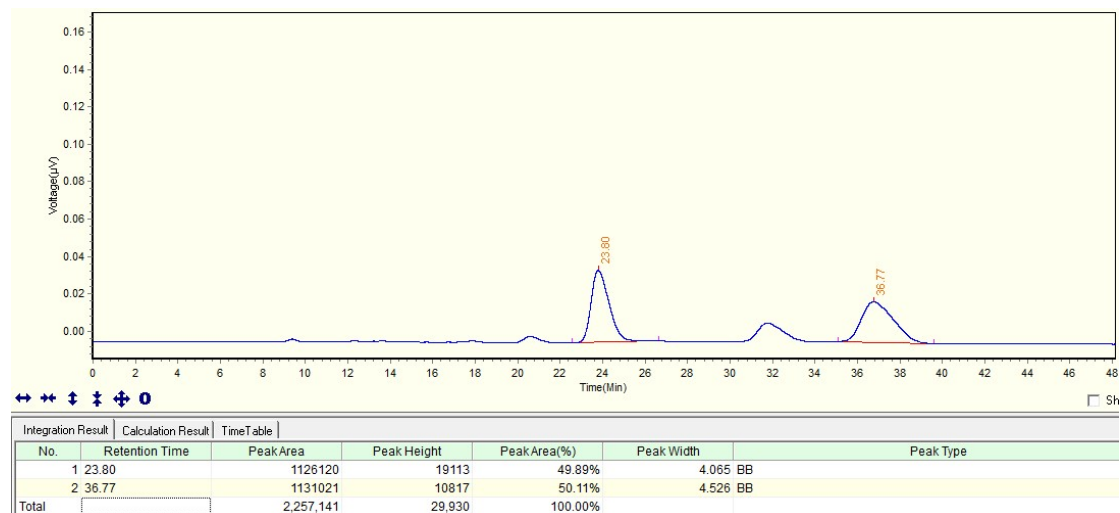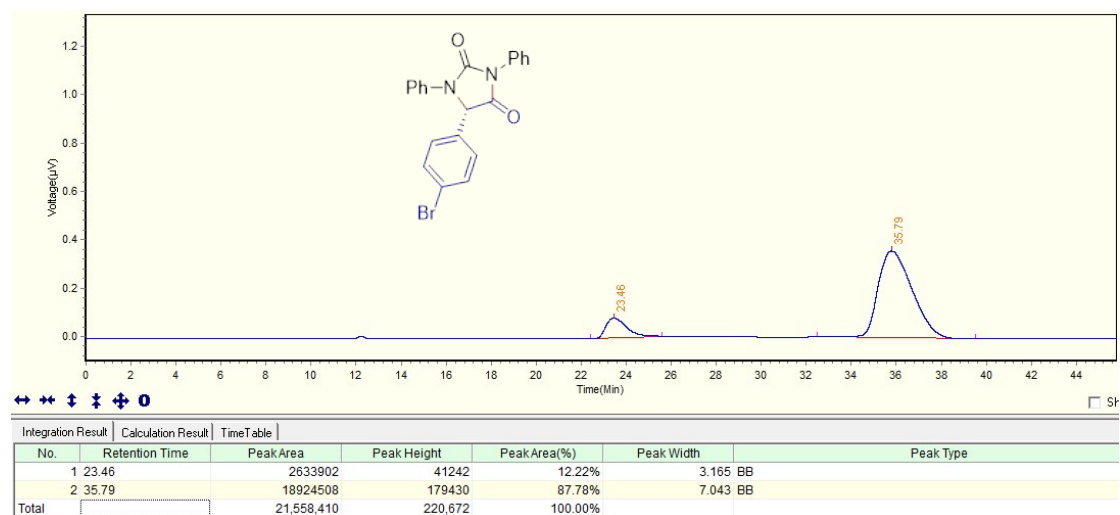

## HPLC spectra of 3bg

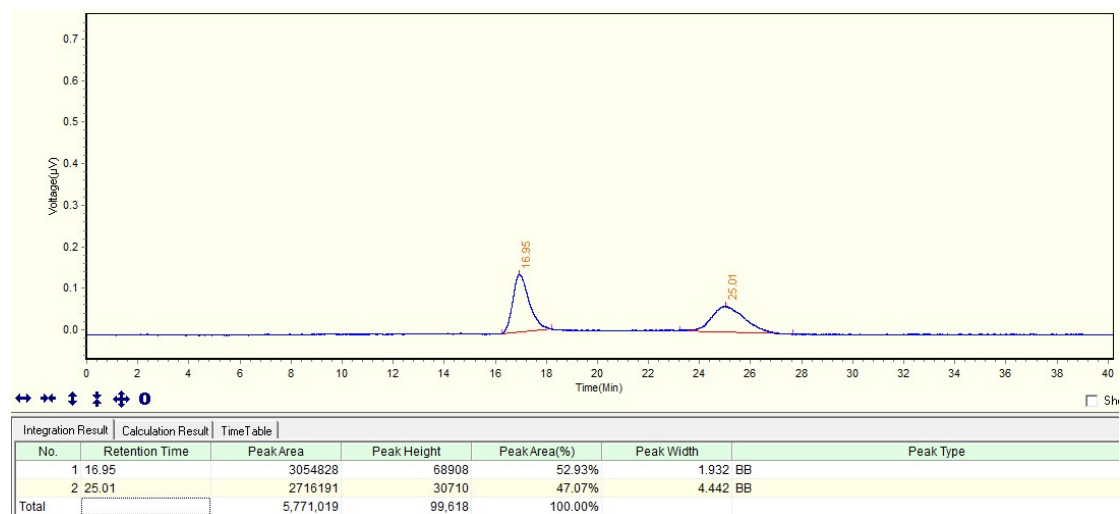



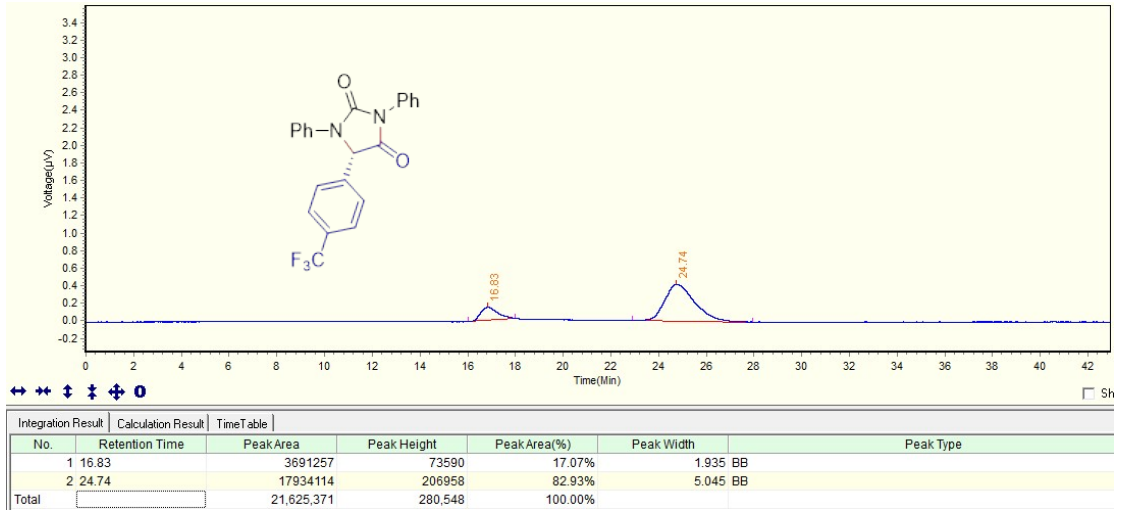

### HPLC spectra of 3bh

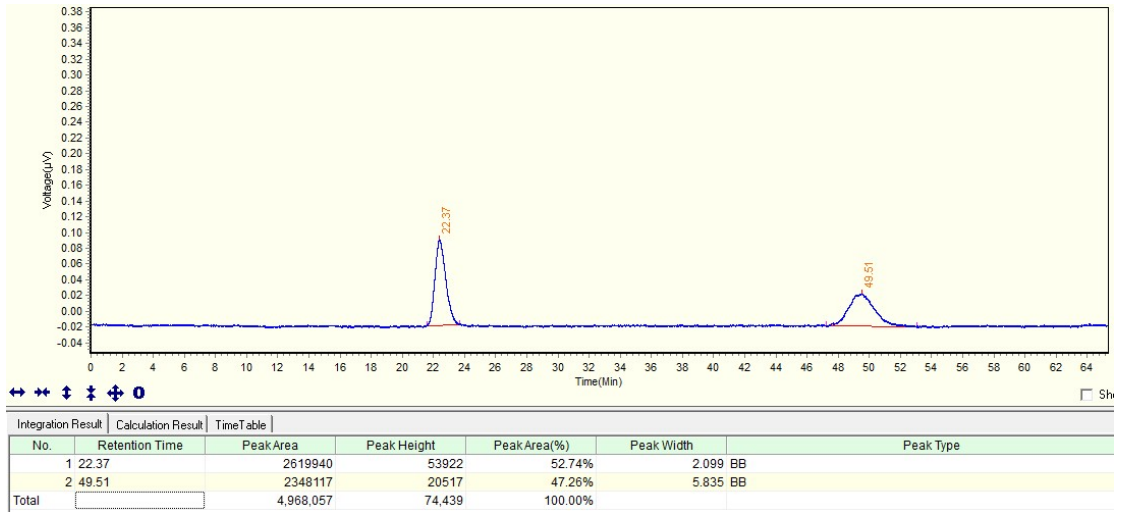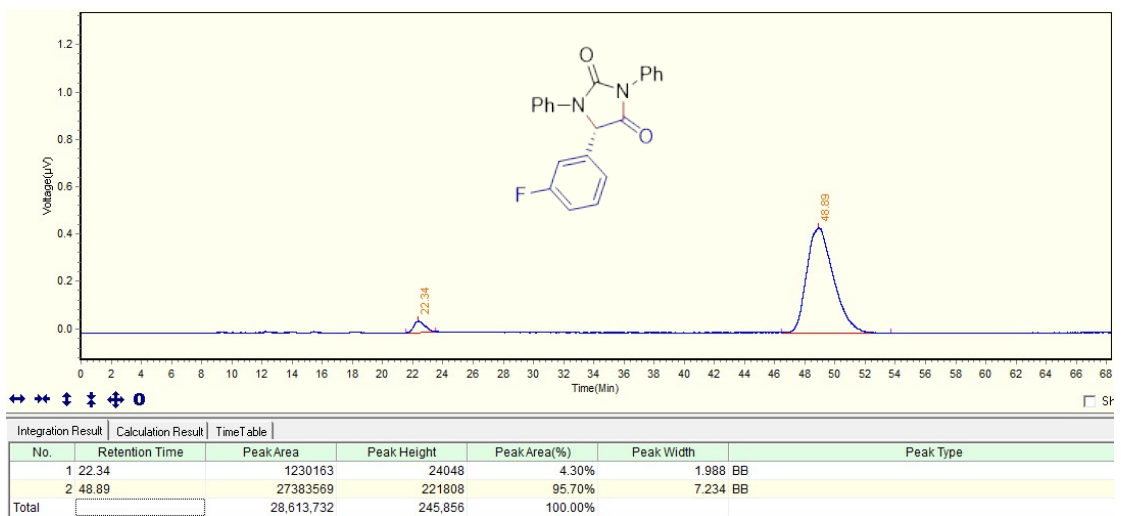

## HPLC spectra of 3bi

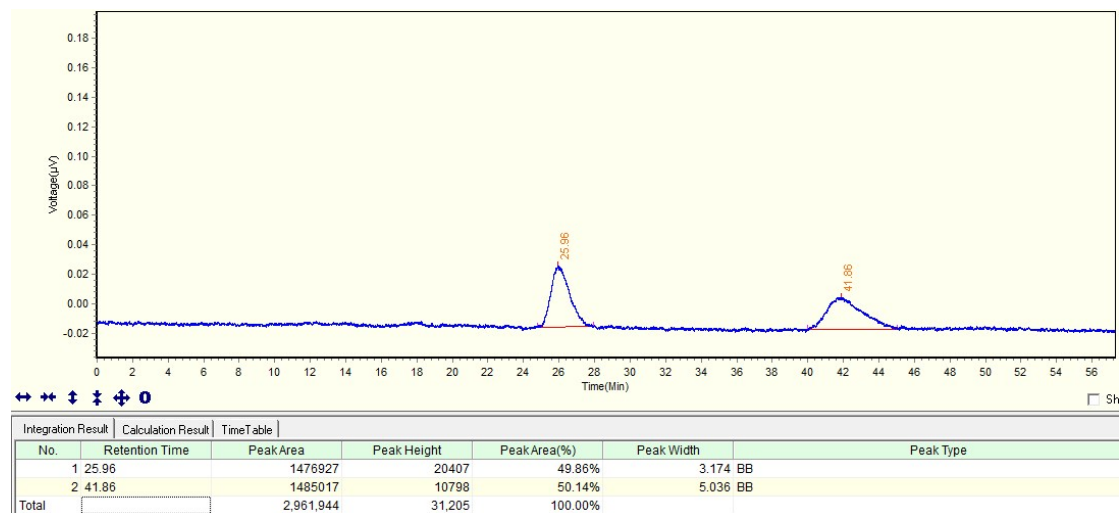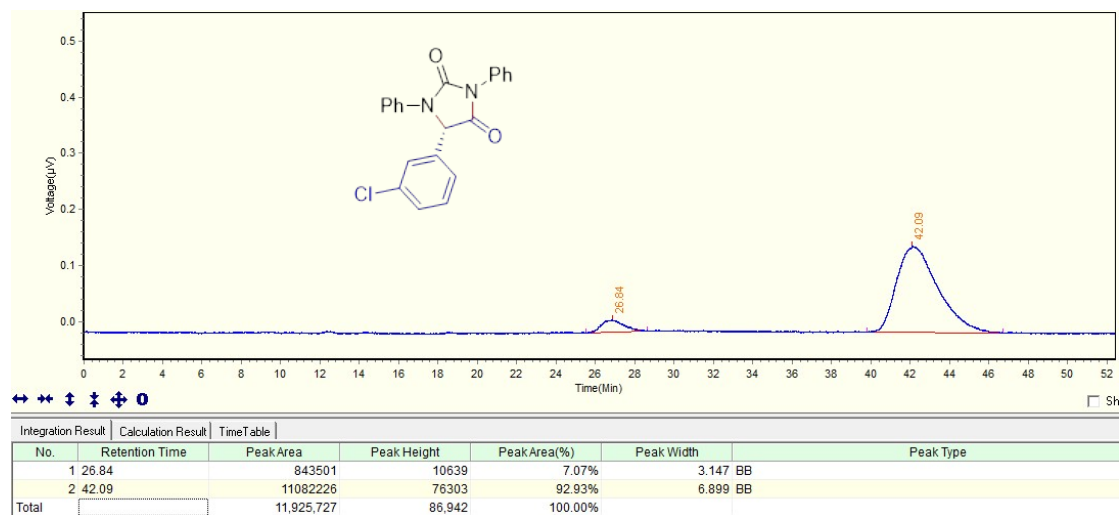

## HPLC spectra of 3bj

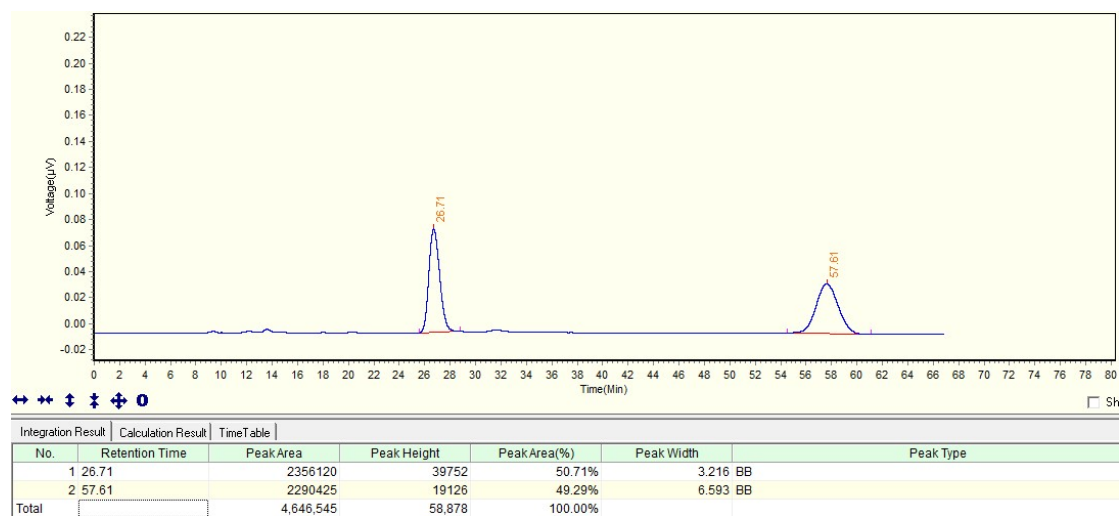

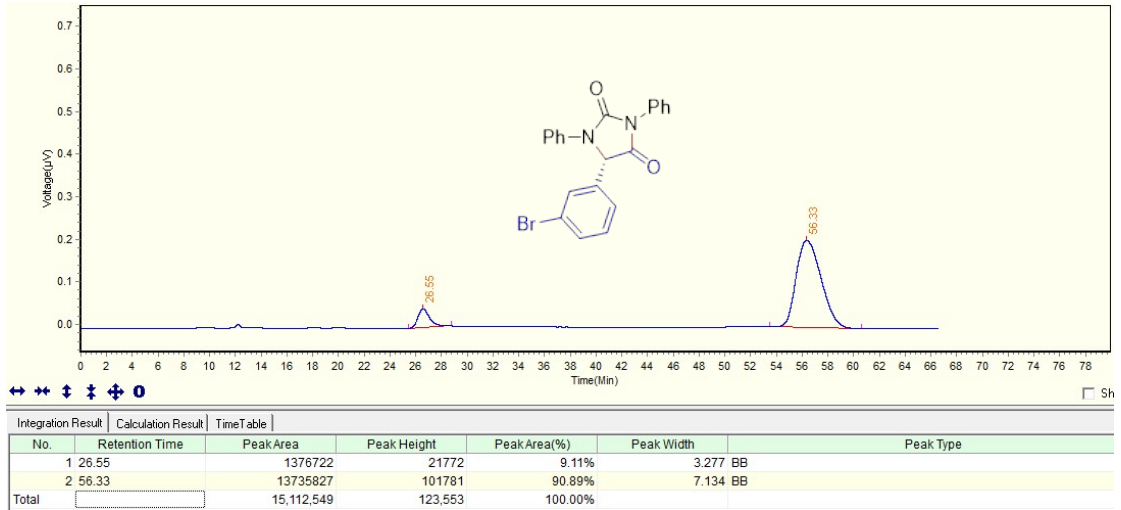

### HPLC spectra of 3bl

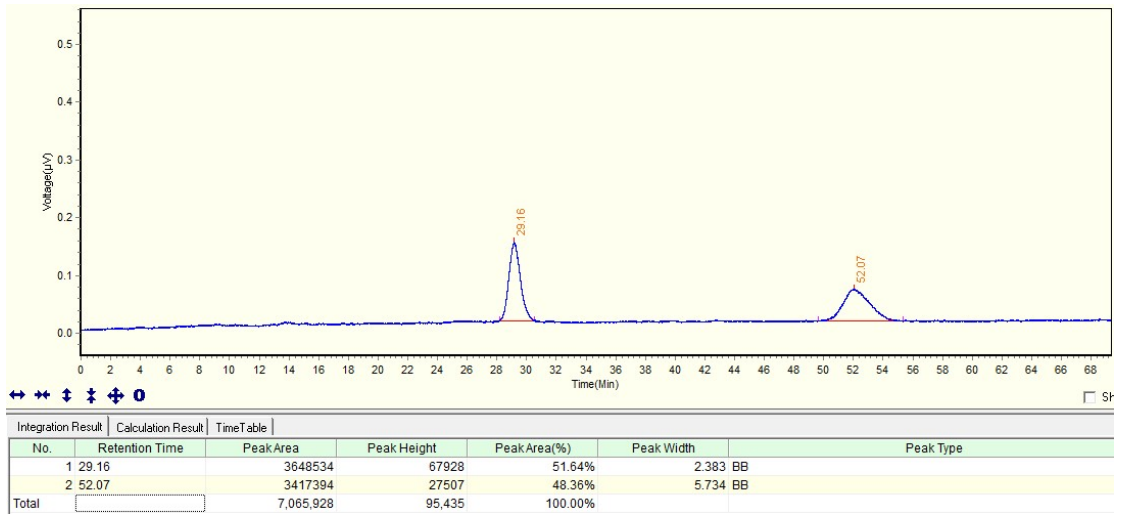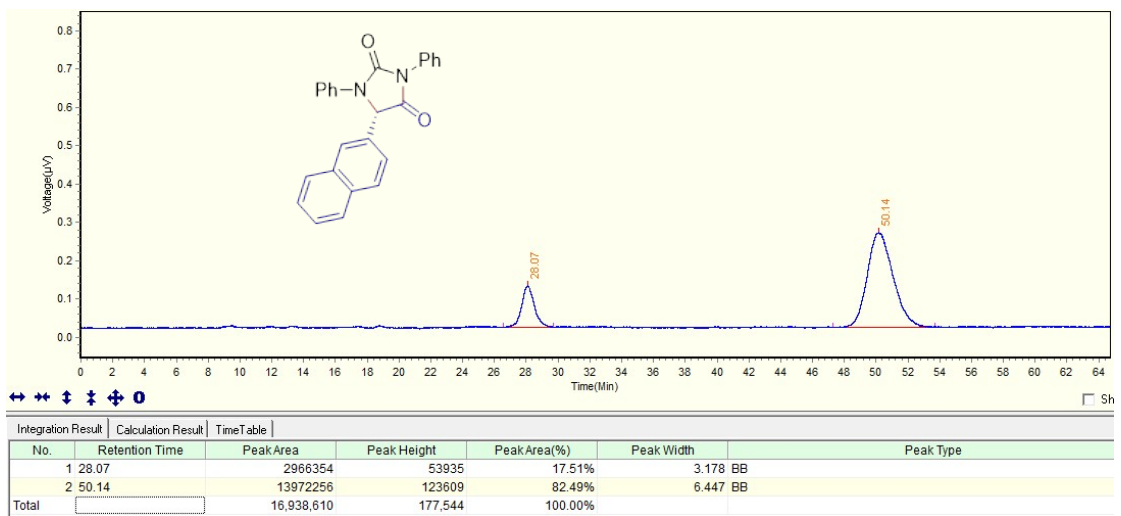

### HPLC spectra of 3bm

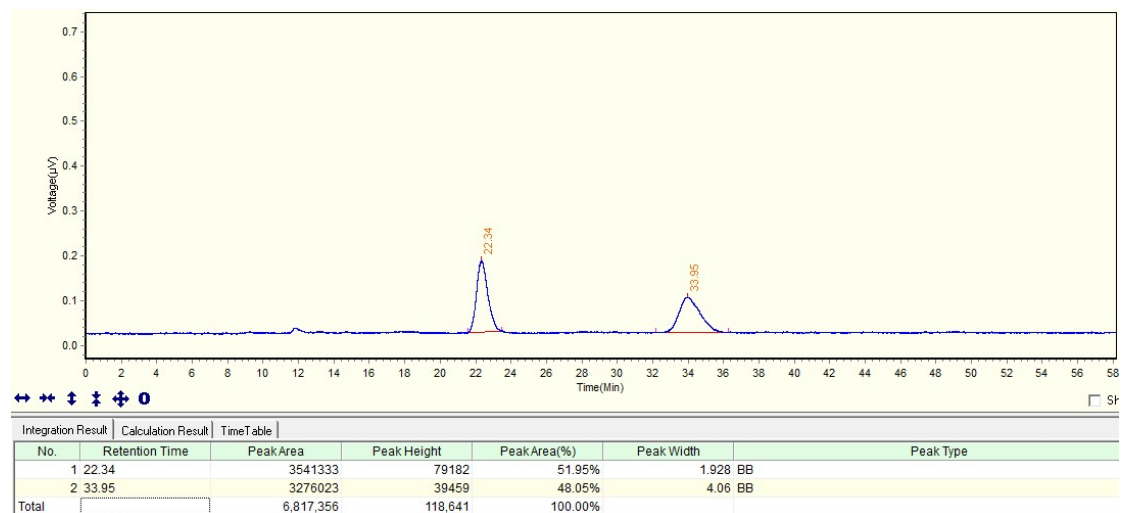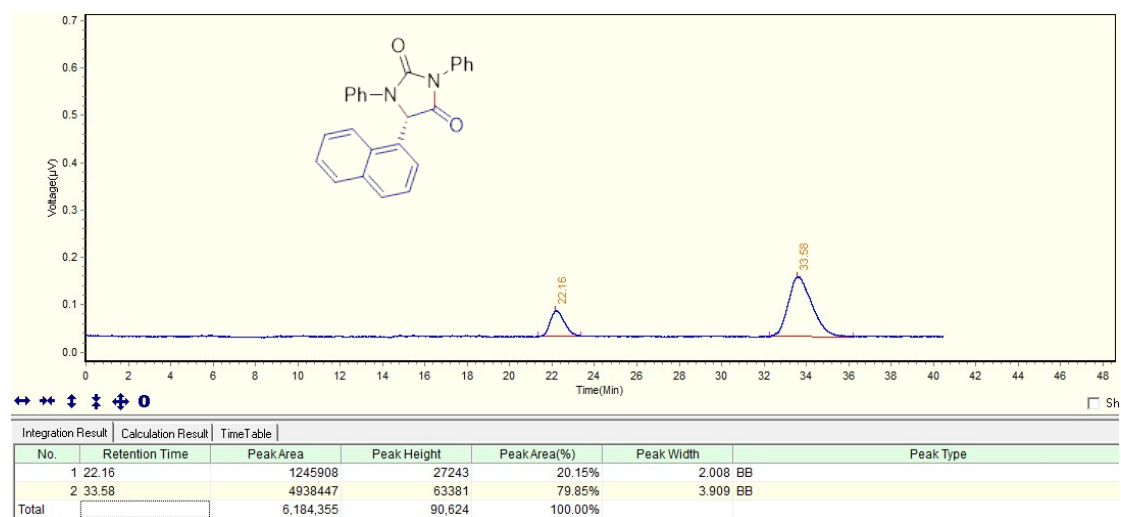

### HPLC spectra of 3bn

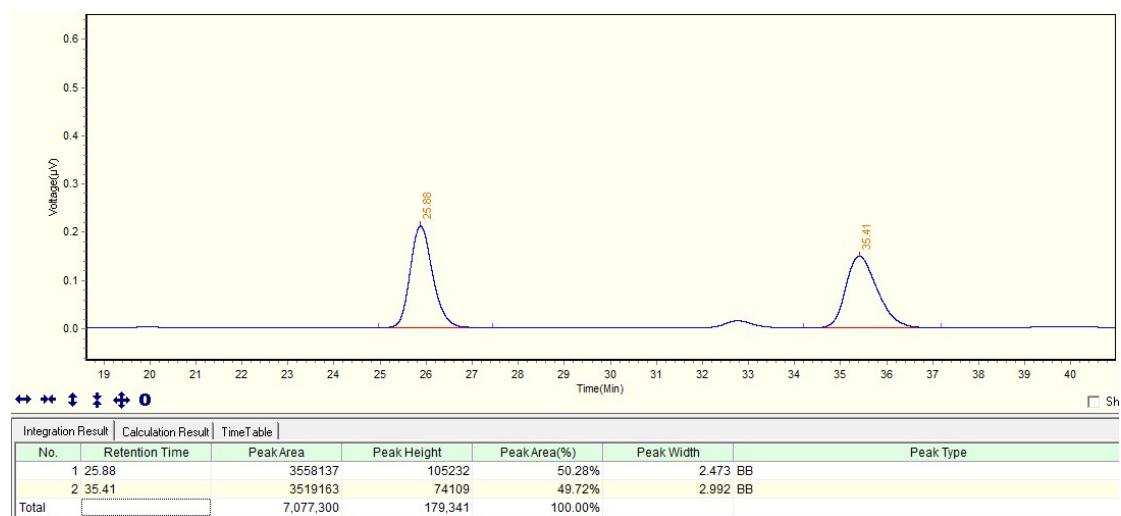

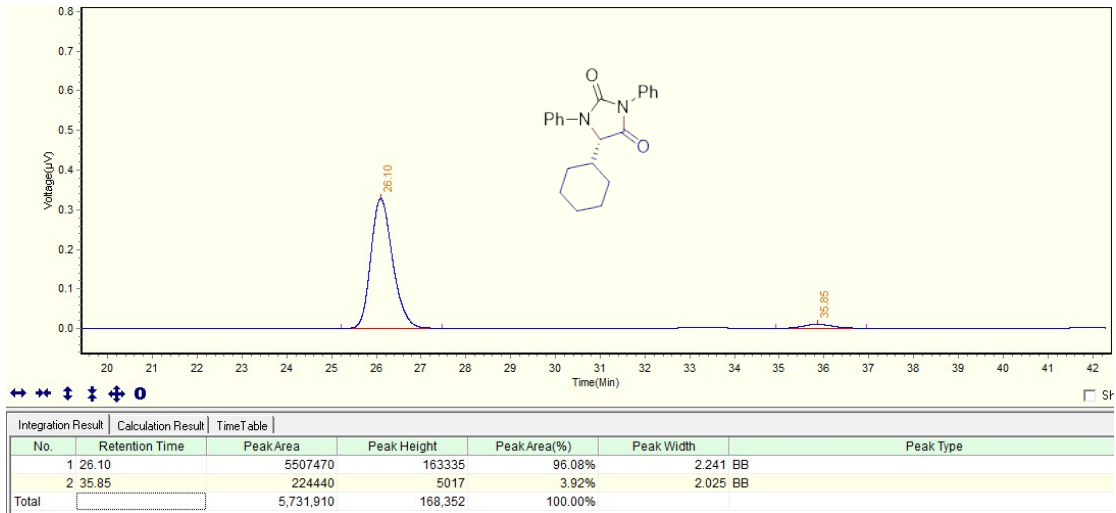

### HPLC spectra of 4

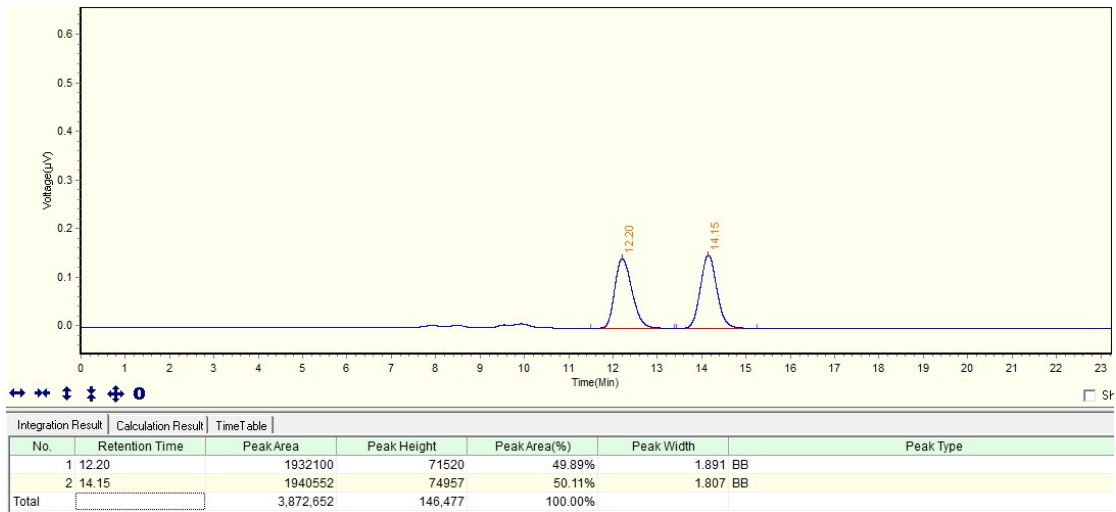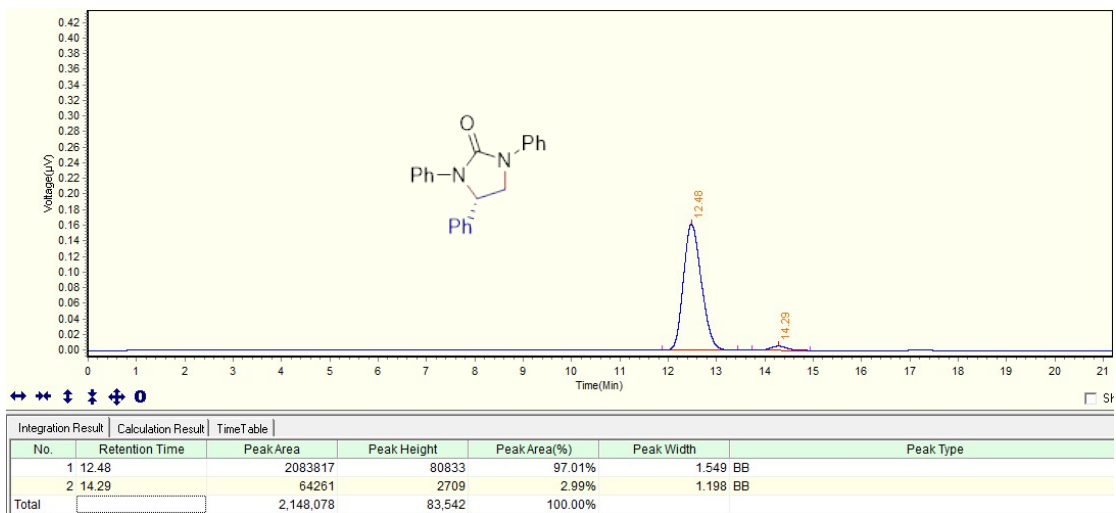

## HPLC spectra of 6

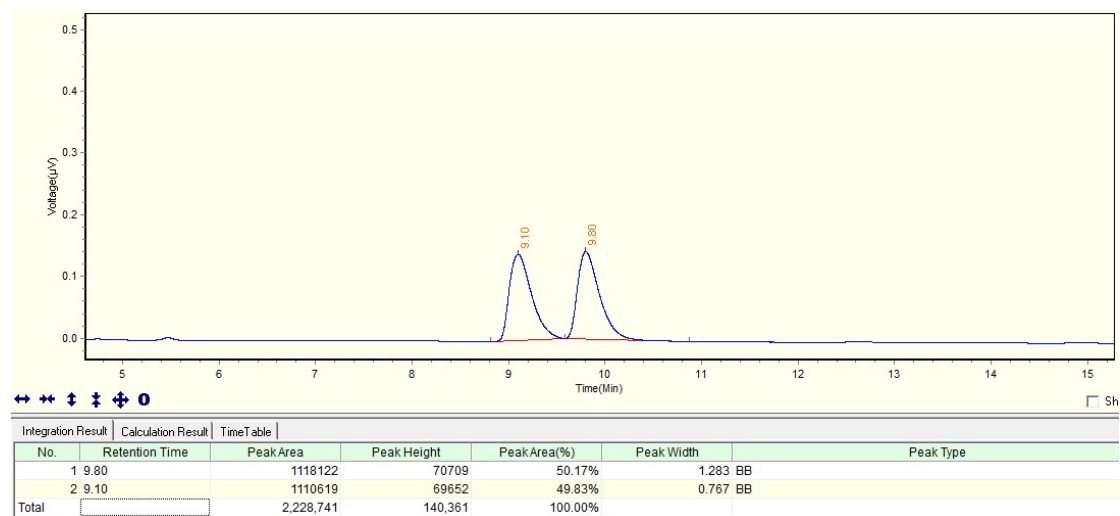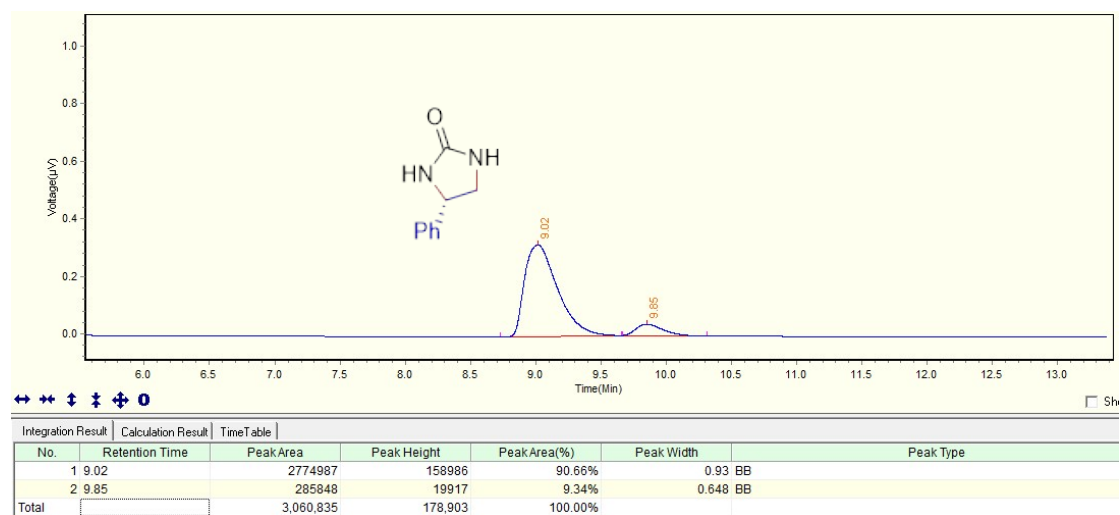

Supplement: d3qo01194a1.pdf [file d3qo01194a1.pdf]
